# Supplementary material for: SpoVT: From Fine-Tuning Regulator in Bacillus subtilis to Essential Sporulation Protein in Bacillus cereus
Source: Front Microbiol. 2016 Oct 13;7:1607. doi: 10.3389/fmicb.2016.01607 (PMC5061766; doi:10.3389/fmicb.2016.01607)
Supplement: Table S1 — Primers used in this study. [file DataSheet1.XLSX]

## Sheet: S1_primers
Table S1 - primers used in this study
Primer	Sequence
AKupVT-F	CGGAATTCGTTTAGGAATGGAAGGATCAC
TIFN16	GGGGTACCTTACTGTTCCATTTGTTTCGCTAAG
BsuVTF2	CGCGTGATCACATCAAATGAAAGAGAGGCAC
BsuVTR	CGCGAAGCTTCGGCACGCATGAAAAAG
dCVT-F1	CGCGCCCATGGGAGACGGGTGTAGATATTCCG
dCVT-R1	CGCGAAGCTTGTTGCTTTCATTCTAATGCTGCCTC
dCVT-F2	GCGCAAGCTTGGAACAGTAAGGGTATATTG
dCVT-R2	GCGCGGAATTCGGACACTGAATCAGCCATCTG
TIFN41	GGCGGGTACCGCGTGCAGAATTTATTGGATGGTGG
TIFN42A	CGCGGAATTCCAATTTCATTCACCCCTTCACTCTTCCTCGTAGTTGTAGTATG

## Sheet: S2_Bce_expression rpkm RAW
Table S2 - rpkm values representing expression of genes during three different time points in sporulation of Bacillus cereus ATCC 14579.
WT :	wild type
delta-VT:	ΔspoVT (BC0059)
locus tag	T3-WT1.rpkm_9	T3-WT2.rpkm_9	T3-deltaVT1.rpkm_9	T3-deltaVT2.rpkm_9	T4-WT1.rpkm_9	T4-WT2.rpkm_9	T4-deltaVT1.rpkm_9	T4-deltaVT2.rpkm_9	T5-WT1.rpkm_9	T5-WT2.rpkm_9	T5-dVT1.rpkm_9	T5-dVT2.rpkm_9
ABC_transporter_permease	31	36.1	26.3	15.2	54.6	44.6	212.4	31.7	22.5	12.1	23.2	18.9
ATP-binding_protein	74.6	75.9	57.2	72.6	181.8	41.7	58.5	33.1	47.5	19.5	13.2	36.7
BC0002	49.4	90.6	101.4	20.4	86.8	33.4	19.5	107.3	75.1	45.6	64.4	72.8
BC0003	1369.1	1077.2	1366.1	1137.1	2203.5	1926	447.9	605.2	360	280.2	374.4	228.7
BC0006	1964.9	1466.2	1591.4	1269.6	1728.9	2429.2	1962.3	1262.9	1323.1	1276.5	1484.7	1581.4
BC0007	482806	258646	216293	178383	944031	326289	386366	135658	188648	126928	253536	313213
BC0008	12424.2	3453.5	5488.6	4366	2903.5	6466.5	7639.2	21652.7	10895.9	12131	14321.4	19389.3
BC0009	51199.7	18419.5	17831.8	13280.2	14179.2	27927.9	26908.9	111023	53570.5	37031.6	76773.2	80071.7
BC0010	3.40121e+06	1.66726e+06	1.2524e+06	1.24424e+06	4.54673e+06	2.02753e+06	2.16928e+06	779916	866088	744829	1.21841e+06	1.36798e+06
BC0011	1.08754e+07	1.68451e+06	1.76278e+06	1.73732e+06	980877	4.85367e+06	4.86128e+06	1.7997e+07	5.06291e+06	6.54983e+06	1.68923e+06	1.03918e+07
BC0012	49.9	20.9	20.5	30.6	26.7	13.1	48.9	39.1	38	38.7	17.6	29.1
BC0013	2644.2	2800.6	2654.5	3065.4	2225.2	2646.4	3141.9	1846	2806.3	2160.2	2237.3	2603
BC0014	292.2	191.6	158.4	303.6	232.4	169.9	99.8	124.9	315.7	229.2	381.4	234.9
BC0015	5170.6	3451.8	3848.1	4919.2	3083.6	3606.6	3319.6	2073.2	6499.8	3884.1	5230	4518.7
BC0016	4700.2	3121.8	2963.4	3447.6	3356.2	4013.3	4531.1	2710.6	7000.5	3859.4	4413	5192.1
BC0017	885.4	787	926.5	875.2	615.4	1522.3	1282.5	1112.1	886	729.7	1012.5	966.7
BC0018	329305	53824.9	62272.5	53838.7	48722.4	105192	107098	818218	287372	586032	146728	485982
BC0019	557.7	531.8	790.4	1038.1	627.5	1205.1	662.5	1076.6	1071.1	1947.8	1284.7	2124.9
BC0020	0	14.8	12.6	3.9	18.3	240.5	4.1	36.1	24.4	2.7	27.4	75.5
BC0021	6.5	21	10	20	46.9	56.6	27.5	24.4	11.3	31.5	27.4	34.7
BC0022	99.9	58.1	60.5	42.8	93.2	42.2	55.2	298.6	68.7	27.4	37	120.1
BC0023	58.6	75	125.1	165.6	34.1	33.9	39	46.8	69.2	48.4	40.7	33.3
BC0024	3852.3	2634.4	2567.7	3346.3	2600.7	1974.3	2246.1	1727.9	2648	1623.5	1979.1	2044.7
BC0025	2697.1	3042	3319.9	3439.3	3515.8	2736.7	2421.2	2261.8	2975.3	1891.2	2414.3	2891.3
BC0027	3491.6	4624.3	4883.6	4517.1	6466.1	4488.4	3694.3	3750.5	6261.6	4124.3	5093.4	4524.3
BC0028	132.9	74.5	72.7	49.2	192.1	567.9	91.9	50.6	59.9	66.4	72.1	113.2
BC0029	557510	269268	217409	174926	947685	312274	381630	137930	190735	123764	261325	308821
BC0030	14790.7	3147.2	4082.6	3631.8	1556.6	6611.5	7427.2	24351.4	12674	9593	14777.6	19867.3
BC0031	47698.6	18868.8	17865.9	14753.5	13586.8	28488.1	33278.5	107102	49818.9	33832.7	76118	73122.8
BC0032	1.41464e+06	946722	591446	605275	1.85088e+06	1.0803e+06	1.09066e+06	560610	508454	382792	724799	773058
BC0033	1.07775e+07	1.69929e+06	1.76451e+06	1.74381e+06	974283	4.86845e+06	4.89028e+06	1.79779e+07	5.05494e+06	6.55029e+06	1.67388e+06	10462421
BC0034	0	18.7	79.9	134.2	0	20.7	158.3	51.1	22.6	20.4	48.6	42.9
BC0035	105.1	106.8	170.7	117.8	86.5	20.1	96.7	65.4	52.8	40.7	44.7	35.9
BC0037	596.9	717.7	757.8	520.4	506.2	368.7	567.4	508.3	255.2	355.6	161.5	153.3
BC0038	990.7	1333.5	1255.7	1604.6	1452.2	1055.6	1073.8	593.1	624.5	331.1	526.2	285.1
BC0039	994.7	1084.6	876.8	1704.7	1834.8	782.2	1690.8	651.8	716.8	971.9	1010	1084.4
BC0040	14	33	17.3	38.5	59.5	5	7.8	55.6	20.5	4.8	30.9	33.7
BC0041	49.2	35.6	28.5	31.3	51.6	10.9	14.7	27.3	85.7	90.5	46.7	53.7
BC0042	2992.2	1751.7	1498	1693	4234.4	985.6	320.2	747.5	704.1	901.6	609.1	244.6
BC0044	35.2	159.9	60.2	86.9	119.5	110.9	480.2	97.7	165	136.7	174.7	101.7
BC0045	294.3	150.5	157.1	82.8	229.9	195.1	31.9	55.4	49.7	37.4	41.4	147.3
BC0047	28.8	13	30.6	24.7	7.2	23.9	12.5	35.6	28.6	41.5	34.5	18.1
BC0048	0	23.2	26.9	23.3	0	6.8	0	35.6	14.8	16.2	17.1	30.7
BC0049	834	1205.5	907.5	646.8	503.7	650	1049.7	825.4	549.3	1295	696.4	678.6
BC0051	789.4	871.3	973	1051.7	902.1	1029.4	1061	1058.2	1071.9	1131.5	1308.7	1226.9
BC0052	526.4	530.4	658.5	536.9	346.1	1849	769.3	477	539.8	1087.8	754	585.3
BC0053	16639.5	23362.3	32352.7	38935.7	15766.8	48286.7	70202.3	50045.1	33780.1	82714	61262.1	59085
BC0055	1612.3	788.6	882.6	1148.3	785.7	1344.4	1156.8	1060	1041.9	857	1078.7	1276.8
BC0056	3839.9	3891.4	5324.4	5802.2	3491.4	9095	20173.7	6613.1	8638.8	18324	15378.5	14342.4
BC0057	1520	1539.4	1419.6	1280	477.5	1508.4	2507	1382.5	2047.7	2977.5	2381.2	2338.1
BC0058	666	643.3	465.9	429.2	761.6	614	436.9	252.4	349	381.4	443.5	358.5
BC0059	712.7	758.7	15.2	2.9	759.8	504.8	16.3	24.7	396.2	933.1	18	8.9
BC0060	82.5	133.2	132.9	136.6	77.7	95.8	117.1	74.7	161	135.7	199.7	146.4
BC0061	440.8	341.5	323.6	364.5	324.2	305.7	311.5	249.1	495.6	365.5	780.7	694.9
BC0062	315.1	353.4	376.6	385.1	501.8	286.4	304.8	443.5	490.7	623.7	503.3	572
BC0063	57	174.4	237.2	235.9	353.2	88.2	206.8	202.9	194.7	235.2	365.2	382.3
BC0064	2657.3	1329.8	1618.8	1243.3	295.9	1390.7	1099.1	873.5	1313.6	1035.6	1366.7	1029.5
BC0065	7019.3	3237.7	4152.4	4117.1	1578.4	4851.8	3059.7	3876.4	3350.4	2923.5	2561.8	2594.2
BC0066	6459.2	6922.7	7832.4	7389.4	5651.8	7861.4	8051.8	5743	7383.7	5422.2	5669.8	5990
BC0067	88144.4	9281.3	15637.9	23930.3	20934.2	42457.8	41971.4	117377	31370.8	49223.3	27781.5	89560
BC0068	8599.1	1001.3	2401.5	2195.8	455	3250	4124.7	3543.4	3305.8	5636.2	2388.5	6318
BC0069	246.4	159.8	445.5	295	1377.1	2794.5	14730.6	4573.3	13382.9	20129.4	20092.6	23364.8
BC0070	1392.3	1279.5	1510.5	1661.2	1036.8	754.2	767	845.4	919.9	985.3	587.6	678.8
BC0071	2360.5	1615.6	1703.4	2315.1	1825.6	617.9	1122.2	938.8	1255.4	898.1	1023.2	898.5
BC0072	4028.5	4217.1	4940.4	5776.5	4440.4	4972.9	5784.4	3399.2	5760.5	4198.4	5914.3	6318.7
BC0073	468	220	242.8	292.6	56.9	119.4	35.5	202.5	151.9	330	139.2	100.7
BC0075	16760.1	14744.9	17440.1	12483.7	13693.3	28909.2	30735.7	16119.4	47440.6	37135.8	40094	41079.6
BC0076	424.4	436.5	519.3	539.9	434.6	271.6	481.6	339.4	363.2	190.6	253.8	304.8
BC0077	153.8	443.9	623.9	563.6	330	307.8	263.9	395	293.2	313.2	296.1	314.8
BC0078	270.4	214.6	290.7	277.9	155.6	249.6	354.7	456.3	192.2	229.3	194.2	253
BC0079	163.5	176.3	186.4	176.4	230.4	73	180.2	193.4	217.3	61.8	137.9	129.6
BC0080	214.9	142.9	238.3	198.7	163	15.2	185.5	145.7	39	59.9	122.9	44.1
BC0081	202	109.6	143.5	351.6	179	109.6	163.9	186.2	116.7	40.2	129.7	123.9
BC0082	698.7	90.2	127	248.3	257.2	68.6	28.2	147.6	100.9	47	193.8	81.8
BC0083	629.4	210.3	266.5	248.7	140.6	216.1	333.6	200.2	300.1	280.4	253.2	197.6
BC0085	505820	289029	240592	200266	1.15634e+06	365659	439114	146550	216857	140481	274785	352770
BC0086	2598051	1.46804e+06	1.03039e+06	1.01105e+06	3.58751e+06	1.70628e+06	1.82827e+06	684743	757941	624211	1.0782e+06	1.18556e+06
BC0087	58601.5	6587.7	10021	10693	9164.1	14478.1	18990.8	84129.5	20522	29972.8	23784.7	43435.8
BC0088	26673.8	5133.9	6536.5	4953.9	6919	14076.6	11387.2	34400.7	11685.8	13497.4	12276.4	20939.4
BC0089	10526	2875.1	3822.2	4166.8	4334.9	8702.1	4155.7	16622.5	6616.3	6056.2	6405.3	13084.7
BC0090	13536.2	1819.5	3103.4	3869.9	1932.1	3504.5	4129	35544.6	3151.6	6764.1	3035.2	8637.9
BC0091	113446	20277	36713.3	41942.4	17347.1	60510.4	60652.7	227620	73261.3	77359.1	59309.1	134412
BC0092	30955.7	6488.5	19211.2	24206.6	4989.1	17464.5	19907.5	38350	34998.7	39413.2	10453.2	55514
BC0093	13650.7	2440.3	4788.3	3675.5	4177.2	3819.9	6597.6	13022.2	3648.1	4522.9	4791	7440.2
BC0094	19606.3	4925.8	8984.7	5075.7	5702.5	6056.8	9225.5	25901.8	5737	7200	7480.4	10382.6
BC0095	83477.1	22113.6	27096.4	24454.1	13956.6	37288.1	44339	172307	68932.2	49593.3	88883.8	111749
BC0096	525350	309413	247047	205181	1.37103e+06	363376	434534	154409	204415	136269	307063	334171
BC0097	2.65517e+06	1423962	998115	970858	3.50762e+06	1664434	1774972	687358	750073	611955	1.05877e+06	1.16209e+06
BC0098	1.09162e+07	1706234	1.76608e+06	1.73701e+06	1.01134e+06	4.85365e+06	4.86324e+06	1.79547e+07	5.09533e+06	6.51581e+06	1.69401e+06	1.04124e+07
BC0099	308.5	564.2	436.8	769.9	313.9	243.3	873.2	386.4	411.5	449.6	623.5	377.7
BC0100	1114.1	1324.8	1699.3	1555	1665	2389.8	1470.8	1140.9	2239.6	2350.4	2604.2	2545.1
BC0101	2457	2635.2	2617.7	2446.7	1920.5	2465.3	4118.5	2404.2	4489	3620.4	5716.8	5977.6
BC0102	9749.7	8818.8	9098.8	8134.6	8523.6	14818.8	21327.8	10670.6	16920.4	20314	25058.1	28793.2
BC0103	462.2	703.5	699.9	720.4	807.8	724	812.8	703.5	890.7	680.4	1189.3	1254.1
BC0104	229.4	514.6	394.8	342.2	405.3	697.7	846.5	360.2	515.6	455.9	634.8	653.3
BC0105	1061.5	1224.2	1177.7	1594.6	1180.1	1249.7	1227.8	1232.4	1546	1226.2	1779.4	2081
BC0109	195.9	423.3	408.7	396.7	683.5	599.7	961.6	437.4	1108.5	452.8	763.1	934.9
BC0111	2488.6	1013.6	994.3	1047.6	1457	2366.4	1606.8	1296.1	1502	946.9	1116.2	1379.8
BC0112	1492.3	1100	1423.5	1132.2	1987.2	2724.2	2349	1669.8	1474.1	931	1385.6	1819
BC0113	1090.5	1518.1	2622.9	1971.6	2379.4	3621	2787.9	2542.9	2022.4	1644.8	1653.3	1733.1
BC0114	5877.4	5723	5559	5786.7	5418.4	7268.4	8188.3	6130.9	9883.7	10822.7	6902.7	6356.6
BC0121	23	70.2	126.4	104.3	88	49.9	6.9	59.8	100.2	115.2	134.8	73.7
BC0123	7343.4	3523.8	4925.8	4991.7	4285.8	9397.4	11170.2	7652.2	5439.1	5354.4	8674.9	10363.8
BC0124	8392.6	5586.7	9501.6	9522.9	6779.5	17258.1	18077.2	15281.9	8036.3	7780.3	10782.5	14742.5
BC0126	3637.3	3107	3916.7	4874.7	4577.9	5592	6022.8	5383.9	5744.9	4403.5	7473.8	7986.6
BC0127	3728.2	1613.1	1828.6	2470.9	3992.9	4363.6	1736.4	4278.6	2060.8	1936.3	3930.6	4203.9
BC0157	5036	3323.2	3022.7	4915.6	1645.3	2234	3520.4	2366.4	2570	2368	4057.3	4952.2
BC0158	7762.7	3318.8	3653.1	5365.5	2291.4	3450.4	5101.7	4209.2	3048.5	2866.8	5506.2	5771
BC0166	0	5.4	5.3	5.1	5.1	14.9	14.5	42.3	8.8	3.9	26.5	46.2
BC0167	17.4	10.3	8.7	8.1	5.9	2.5	36.4	42.3	28.2	2.4	26	3.4
BC0168	2684	3383.6	4565.1	4508.6	2002.8	5534.1	3523	2993.7	1257	1164	879.2	1316.9
BC0169	149.7	738.7	983.6	1163.3	444.4	617.8	819.8	597.4	214.9	263.9	151.7	244.4
BC0170	745.5	1609	1926.7	2167	1090.6	2867.6	981.4	1476.3	999.8	1027.6	690.3	1004
BC0171	24.8	21.4	21.6	3.6	18.1	71	7.8	18.6	11.6	9	29.7	9.6
BC0172	52	5.1	23.9	14.7	48.9	8.2	16.8	55.9	8	4.5	19.4	8.5
BC0173	480331	256472	214156	176631	939732	323932	389163	136573	190725	123450	255484	312729
BC0174	2.59219e+06	1.46916e+06	1.0283e+06	1.0107e+06	3.59664e+06	1.70216e+06	1.83451e+06	688284	759566	622367	1.07859e+06	1.18588e+06
BC0175	179322	13312.3	33407.7	37397.9	19856	74909.7	67226.8	201621	118046	203678	68539.6	289452
BC0176	31689.2	7676.1	13027.1	10666.5	5633.8	31795.8	22312.3	55638.3	31405.6	34558.1	38692.7	50158.9
BC0177	26495.7	4204.8	7007.7	3849.1	10898.9	7740.4	10276.3	38262.1	9225.7	11241	9449.8	13967.4
BC0178	33689.6	8482.9	9323	8312	6095.8	13906.2	14596.2	70136.7	19417.8	24572	30925.1	35211.2
BC0179	69573.6	11357.4	12350.8	9572.8	8742.3	20366.5	21155.4	187662	38615.1	30444.2	38556.7	45587.4
BC0180	20081.1	3405.7	4927.6	3952.2	5928.7	8308.1	7818.3	79789.8	16927.3	22382.4	16951.6	30814.4
BC0181	3246.8	491.3	1142	1165.3	447.4	1559.1	961.8	2784.1	781.8	1344.2	640.5	2262.4
BC0182	62068.1	7870.3	10347.3	11627.4	8530.4	18422.8	24633.5	111695	16421.9	20173.5	22115	36871.7
BC0183	6004.1	1052.6	1322.5	1769.2	667.8	3323.7	5453.7	20096.7	2029.4	2162.9	3468.7	4344.2
BC0184	88.5	16	37.4	24.1	58.7	9.5	63.2	33.6	34.4	58.2	31.2	17.9
BC0185	40.9	100.7	102.1	75.3	64.4	48.3	33.9	62.6	33.4	26.5	67.6	37.4
BC0186	1258.7	642.3	612.3	637	784.8	475.4	713.4	382.2	390.5	251.6	426.8	246
BC0187	794.6	545.9	417.3	414.7	923	289.3	262.1	201.5	433.6	405.6	338.3	425.5
BC0189	2574.2	1092.4	732.8	1342.4	1251	588.9	424.2	969.6	513.3	675.5	606.6	580.2
BC0190	2691.6	1138.9	1036.3	1583.5	1052.3	921.5	811.7	575	803.4	669.9	964.6	715.3
BC0191	646.8	396.2	182.9	208.7	501.8	105.7	138	182.7	242	256.9	257.9	314.4
BC0192	281.5	54.5	62.9	32.4	116	75.8	116.3	39.4	102.8	62.2	51.5	54.9
BC0193	539.9	450.6	522	433.8	339.5	341.3	552.2	323.9	551	600.2	672.2	786.4
BC0194	976.1	1896.5	4010.8	8431.2	2065.8	13711.7	9282	9542	74.4	170	55.1	184.1
BC0196	1498.6	1120.7	1684.2	1722.1	760	2830.5	3284	2302.2	3756.6	2469.6	3110.5	3836
BC0197	240.7	111.9	111.2	104.9	329.2	178.9	219.5	277.3	1168.6	933.8	1230.1	1511.9
BC0198	67.9	33.5	26.6	25.1	126.4	87.9	31.1	58.7	837.3	469.5	1045.3	781.1
BC0199	14	11.6	13.7	2.7	2	8.4	3.3	20.5	10.1	5.9	8	13.6
BC0200	1851.4	1414.3	1171.3	1302.9	1688.3	2592.8	819.4	422.2	1357.1	1489.6	997.5	985.1
BC0201	12.4	27.2	23.9	26.5	33	30.6	39.6	27.3	50.8	29.3	23.2	27
BC0202	13.2	21.1	31.2	55.6	11.9	0	0	110.1	26.4	23.9	17.9	23.3
BC0203	502.9	688.3	717.1	710.2	434	979.7	648.7	435.9	570.5	541.9	595.1	584.8
BC0204	186.5	92.2	239.4	225.6	233.6	228.9	315.5	161.4	329	210.5	419.8	390.2
BC0205	33.6	114.6	138.8	49.2	85.6	345.9	12.8	89.7	68.9	42	62.7	40.5
BC0206	111.8	65.3	95.1	77.3	49.6	38.6	134.1	109.4	19.4	120.9	98.9	33.4
BC0207	9	12.5	9.8	13.9	10.3	6.5	4	24.3	27.3	50	26.1	45
BC0208	76.2	53.5	46.6	117	59.2	29.8	2.7	45.2	60.9	3.9	28.2	47
BC0209	88.4	70.4	60.5	39.4	174.6	46.1	181.9	77.6	120.6	81.8	73	58.7
BC0210	526.1	109.1	84	60.1	250.7	97.1	131.6	68.2	134.5	36.8	61.7	48.8
BC0211	766.9	154.3	88.3	111.9	168.1	184.7	107.8	102.7	38.6	86.9	23.8	45.9
BC0212	8.9	4.8	10.4	51.8	12.6	22.9	146.4	73.6	28.8	203.2	37.5	30
BC0213	86.3	105.7	55.6	42.3	49.9	20.5	41.9	53.2	49.3	48.8	30.6	62.9
BC0214	24.2	41.6	26.1	27.4	21.3	10.4	7.7	58.4	4.7	39.5	20.5	18.1
BC0215	136.3	56	83	83.6	103.2	89	132.5	129	81.5	32.5	76.3	67.1
BC0216	6055.2	3017.7	3656.6	5480.1	996.5	1729.5	2039.5	1926.3	1405.6	791.4	918.9	1069.8
BC0217	188.7	419.4	521.8	348.1	502.3	831.6	1099.1	799.6	726.9	1265.8	1911.3	1970.9
BC0218	210.8	316.2	344.7	310	338.5	182.6	578.1	319.6	515.7	417.5	711.7	894.3
BC0219	10.5	22.5	9.3	63.4	23.3	17.1	11.6	22.9	14.4	6.6	7.4	18.5
BC0220	43.5	62.5	53.4	43.1	42.8	174.2	64	111.1	107.2	139.4	134.6	172.9
BC0221	77	19.6	35.5	49.8	19.4	31.5	248.4	69.6	13.7	55.8	54.1	79.5
BC0222	85.6	233.8	296.2	291.5	272.4	196.3	248.3	206.4	87.5	57.6	120.2	39.3
BC0223	0	11.9	41.1	14.8	26.7	44	43.4	64.1	110	82.9	16.1	77.2
BC0224	25.1	74.3	32.5	92.8	39.8	8.4	85.4	76.5	50.8	74.9	47.7	22.7
BC0225	4.6	22.9	52.8	32.8	17.6	29.6	89	78.8	58.9	59.3	166.9	51.1
BC0226	0	28.7	16.6	17	0	16.9	102.7	23.3	25.9	27	6.7	13.2
BC0227	29.8	3.1	0	3.1	8.9	17.2	24.6	12.8	24.8	7.5	6.4	5.2
BC0228	3665.3	2886.6	3751.1	5602.8	2340.9	4425.6	2236.8	3096.5	329	329.9	599.3	487.2
BC0229	0	32.7	94.1	37.1	0	164.4	33.5	66.4	29.3	111.7	32.8	106.8
BC0230	807.7	88.5	73.7	123.4	57.1	141.7	46.1	81.8	89.3	69	83.3	60.5
BC0231	12.5	24.1	17.9	5.4	29.2	11.3	9.8	74.9	32.6	8.6	18.4	11.8
BC0232	59	55.5	113.7	83.8	78.6	19.9	104.4	42.4	44.7	44.3	77.5	50.6
BC0233	0	6.2	4.1	0	5.2	15	0	34.3	11.4	5.5	14.4	17.5
BC0234	37.9	13	9.6	1.2	16.6	6.2	3.9	24.7	8.1	4.6	20.3	23.7
BC0235	75.3	36.1	39.9	24.4	64.3	31.3	28.6	45	20	8.1	14.3	46.6
BC0236	618.5	1098	1134.1	1405.3	541.6	970.3	1070.5	937.8	168.6	308.4	245.6	296
BC0237	109.6	108.9	129.4	46.6	158.9	66.8	103.2	159.1	138.3	177.4	150.5	105.8
BC0238	29843.5	35738.7	66117.5	90665.5	25234.1	248032	152590	77237.1	234261	361386	39024.7	296977
BC0239	60.9	41.7	49.8	68.7	131.2	21.2	92.5	39	50.9	40	49.9	29.4
BC0240	423.6	354.5	429	284.1	120	891.6	500.4	401.4	325.1	389.8	426.1	688.9
BC0241	15023.1	4915.6	4705.8	2559.4	4435	7009	4271.5	3095.6	10992.2	8304.1	6103.2	5937
BC0242	1404.5	586	467.1	310.2	569.8	185.2	293.9	186.2	1118.7	576.5	555	663.2
BC0243	2085.7	1659.2	1391.1	1185	1102.5	589.6	785.7	701.4	2212.8	1036.1	1107.4	1643.2
BC0244	4532.9	2676	2248.1	2077.8	1796.7	2306.3	2592.7	1819.6	2531.7	1373.9	1556.7	2567.5
BC0245	5262.1	3649	3452	3581	2290.7	4266.2	4335.7	3819	3339.1	2309.6	2087.8	3128.3
BC0246	370	516.1	644	698.8	292.9	592	268	395.2	325.5	460.8	280.7	312
BC0247	36991.3	41475.5	27044.4	25709.1	30258.9	27593.3	6334	7006.4	39.5	1119.7	194.7	641
BC0248	45817.8	72044.7	48371.7	51637.2	50435.2	44202.2	13548.1	7644.9	432.7	1571.4	233.5	2214.8
BC0249	21957.6	64558.2	42529.8	53367	58488.6	51863.8	12832.9	13031.5	76.9	1081.8	290.7	634.2
BC0250	24615.3	58767.9	42773.9	55818	51050.9	54206	21622.7	14492.4	248.1	1789.7	122	615
BC0251	36150.8	62848.5	61561.9	76159.3	38673.9	84167.4	20733.5	22498.6	379.6	2064.8	306.2	1305.1
BC0252	2096	2381.7	2636.8	2562.5	5912.7	8180.4	7907.5	6268.3	2627.7	1803.2	1768.8	2994.6
BC0253	2123.3	1839.8	1875	1752.8	6002.4	7505.6	7434.8	5228.7	1392.9	1345.5	1472.8	1859.9
BC0254	4986.1	5044.1	5631.4	5441.4	11662.1	25167	17393.4	14903.3	4400.2	3694	4181.3	5052.3
BC0255	1312.5	1179.1	1208.9	1069.5	541.2	621.3	633.9	454.7	1628.4	776.2	612.8	940.2
BC0256	41.1	104.3	142.1	112	31.1	55.5	80.3	55.2	67.8	149.6	187.5	102.2
BC0258	100.6	85.8	117.6	67.7	133.5	251.4	110.8	182.3	141.7	123.9	225.7	244.3
BC0259	275.9	509.6	464	897.3	494.6	385.7	435.2	308.7	586.6	493.6	810.4	748.7
BC0263	306.4	228.4	186.8	71.8	123.5	325.4	123.2	132.8	117.1	243.6	247.3	260.2
BC0264	199.7	298.4	294.6	150.5	105.2	186	393.1	171.8	135.6	212.6	218	243.8
BC0265	5678.8	3985.5	6283.2	5576.5	5017.2	5334.5	6193.5	3802.1	6259.8	3065	4449.7	5442.6
BC0266	5706.7	5916.1	6215.7	7026.4	3361.2	9566.1	7503.6	4198.6	8430.5	4746.8	7332.6	6177.6
BC0267	83.3	71.6	88	89.3	162.5	56.3	50.9	89.4	64.2	104.8	109.6	98.2
BC0268	84.2	33.4	15.1	23.9	70	28.2	9	59.6	54.8	7.7	22	44.5
BC0269	50676.8	8491.7	14161.9	15059.7	8677.7	37142.2	15517.2	84660.6	25675.6	43600.2	27698.8	46087.5
BC0270	2.18769e+06	223962	332554	259516	294953	678366	722990	3.96648e+06	1377614	2659061	695576	2.85332e+06
BC0271	24323.7	3773	8010.4	7659	11298.4	7153	16406	35800.9	11819.9	13005.7	8954.6	15615.5
BC0272	21415.3	4104.4	7863.6	6789.2	5358.3	8952.8	11910.4	61569.1	12892.4	14076.7	18449.1	19557
BC0273	44972.6	9843.7	17459.3	17688.9	14396.3	28858.5	29762.6	112113	26253.2	30071	24301.3	42481.2
BC0274	62048.1	16220.1	20223.1	21350.9	22644.7	35715.3	37987.6	167884	49282.8	46398.1	33788.1	94384.6
BC0275	21875.7	3545.2	7780.1	7242	8437.6	9479.1	12847.7	86991.4	21147.6	30201.3	19115.9	36424
BC0276	9932.7	2371	6042.9	7552.9	2128.9	3389	4496.5	6354.1	6274.5	7547.9	3632.2	5305.9
BC0277	12368	3545	6372.5	7032.7	4101.6	3918.7	7649.6	31866.2	4694.9	8741.7	4681.4	8164.1
BC0278	199562	25159.3	40697.9	33990.2	94352.5	74110.3	67919.5	212642	53096.2	76859.7	82273.5	121168
BC0279	156373	63534.5	83658.3	58959.6	64559.7	113947	133185	204370	78230.6	105589	108569	139595
BC0280	165374	13781.2	23391.8	26992.7	11508.5	43541.1	47108.6	372750	36782.7	86407.5	27345.3	89081.1
BC0281	563364	299959	252486	198236	1.16263e+06	373749	447244	151781	226607	145038	308715	355451
BC0282	3.19729e+06	1.6794e+06	1.20413e+06	1.20684e+06	3727839	1.9443e+06	2.12323e+06	752368	847300	679292	1.17906e+06	1.31435e+06
BC0283	2.55404e+07	2.96196e+06	3.59925e+06	3.81549e+06	1.55688e+06	8.5332e+06	1.0304e+07	2.37734e+07	8.8798e+06	12036358	2.69507e+06	1.88709e+07
BC0284	97058.1	13452.6	24206.5	25247.6	17912.8	36028.6	48721.6	153127	41431.3	69322.7	29726.9	78323
BC0285	78105.1	27374	39279.7	46111.2	28170.6	62001.9	78579.3	204684	70580.4	75609.7	47300.8	166459
BC0286	44.4	55.3	102.7	139.9	70.7	44.6	0	107.7	86.4	3.6	117.9	34.8
BC0287	7.5	71.5	45.8	30.5	59.4	30.9	18.6	108.1	43.2	79.4	62.5	35.9
BC0288	85.7	115.2	86	70.5	187.6	42.6	132	98.1	142.7	90.7	152.4	131.1
BC0290	345.5	314.6	296.4	293.7	314.8	299	184.5	193.3	245.8	309.5	148.2	240.2
BC0291	2298.6	4571.2	5998.8	7069.2	2547.7	7497.6	3177.9	4615	940.2	1762.2	1129.3	1443.3
BC0292	602.2	524.3	287.6	194.6	410	486.1	524.4	286.9	605.6	756.9	245.4	277.7
BC0293	71.3	246.3	237.1	340.4	281.7	292.9	688.4	187.7	173.7	121	168.6	166.9
BC0297	108.8	38.3	50.8	66.6	50.6	69.5	45.9	74.2	46.6	21.2	15.7	36.9
BC0298	17.2	121.4	121.9	48.6	144.4	91.4	8.2	74.6	120.9	182.5	91.7	64.5
BC0299	249.6	213.9	163.1	186.8	318.1	172.8	231.7	117.5	373.3	441.9	366.5	383.1
BC0300	483070	256682	213947	175250	940683	320764	392197	136794	190443	122870	256159	311990
BC0301	2.6602e+06	1.42781e+06	999693	971010	3.49766e+06	1.67142e+06	1.76879e+06	687487	749379	607958	1.05716e+06	1.15261e+06
BC0302	1.09635e+07	1.72175e+06	1.81595e+06	1773318	992817	5.04827e+06	4902617	1.81814e+07	5.39071e+06	6.83069e+06	1.70542e+06	1.09518e+07
BC0303	51	42.4	41.1	19.7	63.4	47.1	50	37	7.1	33.2	23	22
BC0304	28.3	69.3	24.6	60.4	39.2	2.4	0	115.6	66.9	73.4	56.4	39.6
BC0305	474656	257529	213948	174610	952053	326004	392353	136828	189429	125414	256966	310603
BC0306	2.65465e+06	1.42432e+06	996396	971880	3.49081e+06	1.66853e+06	1.76305e+06	685072	747102	611324	1.05865e+06	1.15943e+06
BC0307	1.0853e+07	1.72346e+06	1.79382e+06	1.75835e+06	998672	5.02903e+06	4.95171e+06	1.81233e+07	5.3965e+06	6.8158e+06	1.71081e+06	1.0936e+07
BC0308	57	55.1	89.6	78.2	23.6	156.6	103.3	79.4	115.9	105.2	41.9	162.4
BC0309	15	51.9	11.9	4.9	20.5	27.1	55.6	25.9	13.3	5.8	10.6	24.5
BC0310	20.5	9.2	16.4	9.8	0	5.8	16.2	20.3	21.8	4.9	10.2	18.9
BC0311	11.3	12.3	12.3	39.8	25.4	11.4	20.2	31	21	4.3	14	6.1
BC0312	12.4	11.8	14.3	4.9	2	12.9	12.4	13.6	12.8	32.1	23.1	23.2
BC0313	10.7	19.7	18.8	17.8	2.4	7.1	32.5	23.1	10	24.3	9.1	14.5
BC0314	7.3	12.8	10.6	16.1	6.4	9.7	4.3	38.6	8.2	46.8	10	16.8
BC0315	480038	257602	214517	177502	948984	324078	393074	135405	190905	124774	255188	312123
BC0316	2.64389e+06	1.4248e+06	997280	973235	3.5008e+06	1.66414e+06	1.77854e+06	686084	753498	614736	1.05869e+06	1.15954e+06
BC0317	1.31794e+07	1868049	1.99751e+06	1.98473e+06	1.09067e+06	5297808	5.53877e+06	1.84713e+07	5.43957e+06	7.08606e+06	1.84697e+06	1.13393e+07
BC0318	38.2	69.9	88.5	39.1	87.2	15.4	172.2	130.9	56.3	18.2	38.9	30.8
BC0319	5.7	9.6	3.7	3.2	6.3	2.3	7	22.9	21.3	4.3	4.5	16.8
BC0320	485691	256984	214716	176578	942172	322500	393886	137140	192501	124240	256868	310982
BC0321	2.65449e+06	1.42571e+06	996091	970818	3496498	1.66772e+06	1.77514e+06	687860	752597	610285	1.06034e+06	1.15723e+06
BC0322	1.32528e+07	1.86024e+06	2.01931e+06	2.023e+06	1.1029e+06	5.2805e+06	5.59594e+06	1.86414e+07	5.47959e+06	7.14547e+06	1.84059e+06	1.13492e+07
BC0323	0	75.5	64.1	14.5	36.1	36.4	117.3	94.3	43	3.5	34.7	49.2
BC0324	77.3	97.1	93.7	72.6	160.6	93.4	37.3	95	33.4	66.8	43.8	43.9
BC0325	233.4	152.2	206.5	147.9	254	100.5	80.4	79.8	127.7	131	150	123.6
BC0326	93.5	168.6	115.5	142.1	261.1	135.6	395.2	134.3	95.2	177.7	159.5	114.3
BC0327	0	100.6	77.4	79.2	7.3	1790.3	0	75.8	30.8	78.6	186.1	184.2
BC0328	182.1	79.3	105.1	55.6	75.8	137.5	520.2	71.3	157.8	27.2	217.4	162
BC0329	65.9	110.1	71.2	95.5	94.3	223.2	82.8	125.9	112.6	129.6	177	182.3
BC0330	200.1	185	160.3	152.8	171.5	575.9	228.4	252.9	276.1	179.6	244.8	252.2
BC0331	45.4	69.2	96.7	106.7	77.4	132.3	178.2	63.9	44.2	110.1	149.3	114.3
BC0334	284.6	83.9	134	197.5	90.7	276.1	308.3	212.5	206.4	192.4	208.6	288.1
BC0335	1976.6	729.5	984	1308.3	1219.5	2098.4	915.3	1489.5	1389.6	1588	1112.9	1688.2
BC0336	862	825.3	1014.6	1103.3	563.2	1302	1470.2	1041.1	968.4	1896.4	1062.6	1223
BC0337	165.3	66.8	542.6	423.9	64.9	400.5	281.5	401.3	102.6	154.2	263.3	184.2
BC0338	0	16	14.2	18.9	48.8	22.9	17.7	6.5	17.8	0	8.6	22.5
BC0339	18.5	194.5	78.9	79.5	116.8	26.8	41	86	45.2	2.7	73.1	52.2
BC0340	270.4	210.6	178.5	210.3	291.8	263.6	492.1	182.7	274.1	272.3	337.6	359.6
BC0342	315.4	312.2	249.5	292.7	297.4	391.3	270	412	217.7	166.3	361.6	350.3
BC0343	43.9	115.4	237.5	213.7	67.7	169.3	315.1	93.7	49	67.3	38.6	90.3
BC0344	6748.3	3491.3	4132	4555.5	3053.3	4452.5	2570.9	1999.6	2417.2	1585	1111.6	1509.7
BC0345	56.3	128.9	161.3	200.1	104.1	299.9	395.7	146.9	632.8	1193.2	820.8	1067.4
BC0346	443.9	328.6	310.4	328.7	481.6	507.4	472.6	320.3	5250.8	2736.4	4200.5	4146.6
BC0347	1693.5	518.4	512.2	477.4	1426.2	798.1	1066.5	971.9	4541	2387.3	2527.5	3788.1
BC0348	4007.3	2204	2363.7	1633.6	3678.9	5633.9	5541	4880	8329.5	5264.8	4478.1	6983
BC0349	1220.3	1051.9	1050.3	943.2	345.2	432.7	2038.7	1235.2	1271.6	1288.4	899.5	1203.4
BC0353	541.3	405.4	539.5	723.2	465.3	311.3	353.7	313.5	394.6	250.3	261.7	215.2
BC0354	0	61.9	15.3	40.3	45.7	202.1	74.1	64.9	21.4	24.3	44.1	189.5
BC0355	6.5	18.2	50.7	34.8	26.8	381.9	1481.5	363.3	3315.4	2964.1	3625.1	4975.7
BC0356	296.2	178	232.4	157.4	235.4	939.2	2887.9	915.8	2450.6	3307.3	3478.9	5151.6
BC0357	559.7	606	897.7	678.2	1062.1	3120.4	11900.5	3347.7	6167	8627.4	10085.6	12089
BC0358	1147.2	321.1	492.9	510.1	563.5	3152.6	4695.1	2817.4	1798.9	4137.2	2381.1	4141.8
BC0359	0	110.3	92.7	109.3	40.1	187.9	0	106	34.8	124.5	58.4	74.8
BC0360	2700.3	1928.6	2295.1	2361.6	1792	1986.2	1966.9	1683.6	2883.8	2437	2276	2656.1
BC0361	562.8	65.1	45.4	48.7	33.5	129.7	17.4	46.4	70.1	95.2	53.3	153.4
BC0362	12.7	13.3	8.5	6.8	6.6	6.3	8.1	32.4	10.6	2.6	6.1	3.9
BC0363	11.2	18.5	22.5	20.8	36.8	9.3	21.9	37.4	11.1	12	40.2	35.4
BC0364	17.5	69.3	35.8	108.7	33.8	89.9	61.4	87.2	147.5	77.9	114.5	43
BC0365	54	44.8	41.7	35.5	50.7	12.6	97.7	60	53.3	85.7	80.8	81.7
BC0366	55.7	28.8	23.6	35.3	32.4	17.1	3.6	45.5	10.2	8.9	24.7	12.3
BC0367	135.6	19.5	39	0	0	33.3	5.4	45.9	36	6.4	15.2	29.4
BC0368	190.8	92.2	54.8	50.1	46.7	195	233.4	64	56.9	6.5	65	73.6
BC0369	88.7	80.5	112.5	38.1	136.4	421.3	48.4	77.3	22.1	2.8	22.9	46.1
BC0370	115.5	191.7	312.6	317.2	195.6	324.4	340.2	251.3	101.9	58.6	53.4	93.3
BC0371	105.4	220	233.5	271.8	182.5	174.1	185.8	127.4	177.6	125.1	53.8	160.3
BC0372	83.6	101.2	195.3	115.3	207	251.8	159	146.4	107	78.2	62.5	118.7
BC0373	177.4	146.6	276.4	148.6	220.7	233.3	114.3	178.5	120.1	60.1	56	151.5
BC0374	338.3	373.4	475.6	421.7	235.8	664.5	727.9	506.4	725.7	490.7	629.8	632.8
BC0375	42.1	54.7	64.1	66.7	62.8	52.1	30	106.5	73.1	23.5	74.7	33.7
BC0376	6031.9	7946	9448.7	11574.9	7033.4	7780.5	7807.5	5212.2	6187.8	3759.9	5748.7	6698.8
BC0377	1970.3	4472.1	5021.5	5675.7	3159.9	4246.6	3563.7	2658.6	2358.8	1421	2280.6	3237.1
BC0378	182.9	556.1	551	568.4	519.2	404.1	231.9	119.6	251.4	314.4	270.5	226.4
BC0380	434.9	465.3	652.7	602.7	446.4	785.1	706.8	464.5	672.9	671.9	549.4	701.9
BC0381	399.6	235.6	298.6	389.1	194.2	452.5	528.1	210.3	311.9	257.3	309.5	428
BC0382	178.8	226.2	150.6	287.9	142	143.4	147.6	111.4	200.5	139.9	214.4	253
BC0383	761.8	710.9	560.3	805.7	1008.7	570.5	214.1	179.5	727.5	638.4	547.4	440.6
BC0384	66.6	154	122.9	141.7	195.6	54.8	27.4	71.6	175.2	143.6	121.7	65.4
BC0385	2248.5	1944.9	2056	2011	1997	1347.6	1228.1	805	2845.1	2929.3	2749.7	2193.7
BC0386	273.7	1239	1179.5	1010.7	1666.2	1505.1	1165.6	1007.3	762.6	1594.2	971.6	1236.2
BC0387	1301.9	1452.2	1790.5	1998.7	815.8	3298.2	1928	2149.6	939.8	1729.2	1459.5	1507.7
BC0388	0	29.7	26.4	99.6	2.7	167.5	26.9	42.7	116.6	98.3	26.1	5.1
BC0389	527	645.2	219.5	55.6	690.8	345	374.2	232	388.6	251.6	356	286.1
BC0390	89	619.5	167.4	27.2	291.2	325.2	100.6	157.5	182.3	75.6	190.3	114.6
BC0391	233.2	196.2	2.6	7	267.3	101.9	118.2	21.9	105.5	74.5	24.6	27.1
BC0392	58.1	110.5	19.2	4	139.7	151.6	8.9	30.5	54.2	113.8	33.5	23
BC0393	81.6	79.8	63.9	51.3	47.3	2.9	56.2	69.7	14.1	41.6	30.2	39.5
BC0394	133	451.6	559.2	805.8	337.6	798.2	363.9	323.2	191.8	198.4	551.7	260.4
BC0395	770.9	1235.1	1230.3	1242.5	1124.1	2497.4	3207.9	2874.1	3643.3	4509.4	2644.3	3305
BC0396	68.7	113.7	177.5	60.6	93.7	322.9	73.3	103.4	44.1	30.6	56.8	77.7
BC0397	41	33.4	32.5	60.5	15.9	13.9	22.6	35	24.5	48.7	16.9	31.1
BC0398	185.1	48	82.5	40.2	70.9	62.2	33.3	54.6	102.5	124.3	67.3	83.6
BC0399	0	10.1	6.1	4.7	6.5	7.2	7.8	36.3	3.5	5.6	6	7.2
BC0400	1244.8	541.9	990.8	1086.7	428.3	188.1	207	270.3	340.8	467.9	858.1	727.5
BC0401	216.6	292.7	298.6	254.6	428.4	962.5	673	328.7	812.6	623.9	463.2	875.5
BC0402	1410.8	1425.8	2013.1	1170.2	2682.7	6851.4	7179.5	3383.1	5087.1	5344.3	4780.1	6400.6
BC0403	525.1	525.8	662.3	657.1	814.1	2144.1	1424.6	1676.6	1315.7	1229.9	1383.8	1850.3
BC0404	16.3	20.6	18.5	9.5	9.1	14.2	11.4	34.1	34.6	40.6	18.9	23.3
BC0405	79.8	195.1	270.2	398	36.6	308.6	45.5	54.4	3.9	21.6	25.2	2.8
BC0406	11.8	24	14.8	12.4	27.3	18.6	7.1	19.8	7.6	9.5	8.6	23.9
BC0407	24.9	22.1	15.6	17.6	14.5	14.6	39.6	31.7	22.1	39.8	17.6	32.2
BC0408	16.6	18.2	19.6	15.7	7.7	6.8	15.6	29.4	11.6	44	10.5	31.2
BC0409	58.4	39.8	37.7	36.7	10.2	66.2	108.1	74.7	52.1	25.6	75.5	59.1
BC0410	459.1	457.6	417.3	514	370.3	180.3	110.1	183.8	16.2	8	25.4	16.7
BC0411	359.7	349.3	287	362.2	261	150.4	80	185.5	390.6	304.1	187.7	266.6
BC0412	23.5	37.7	57	69.4	59.3	75.7	39.4	64	58.8	30.4	41.1	24
BC0413	157.2	88.3	86	93.3	129	234.1	78.8	95.6	153.3	101.3	158.4	166.5
BC0414	104.5	47.1	31.6	41	54.2	8.9	36.6	55.7	69.2	12.7	54.7	44.3
BC0415	5.2	79.7	71.4	69.1	59	26.7	94.3	63.9	63.1	41	83.6	54.5
BC0416	120.2	84.6	60.4	51.3	169.6	14.4	37.2	52.1	52.8	61.6	63.9	46
BC0417	86.4	94.2	92.3	112.8	138.6	101.3	86.8	123.2	140.8	99.1	132.6	203
BC0418	4702.9	5178.7	6894.7	9705.9	2752.5	14565.9	6753	4247.9	9526.7	9436.2	1946.9	7916.4
BC0419	421	655.4	610.9	665.8	523.1	598.9	259.1	390.1	320.8	76.6	292.4	350.7
BC0421	10.2	12	15.6	6.3	2.8	8.9	44.6	31.5	7	10.5	5.3	9.1
BC0422	12.7	16.6	8.1	12.3	25.9	9.7	34.3	33.6	29	31.7	24.6	35
BC0423	50.3	24.5	22.1	27.9	40.3	40.6	22.5	28.7	20.7	6.9	20.9	28.8
BC0424	396.7	395.9	350.5	469.9	206.5	251.8	397.4	157.2	72.9	182.4	198.6	342.8
BC0425	180.6	133.2	194.8	104.4	264.4	39.5	75.7	53.5	60.6	35.8	75.4	43.4
BC0426	278.4	153.7	93.1	128.2	129.3	115.6	52.2	98.6	115.8	64.3	107	96.1
BC0427	347.5	118.2	101.6	125.1	41.4	111.4	71.9	91.6	30.9	36.7	44.9	49.8
BC0428	423.6	54.8	67.8	0	167	164.6	0	71.6	138.4	26.7	9.7	10.4
BC0429	19.1	21	26	14	21.9	87.3	13.2	44.5	38	13.2	34.8	40.2
BC0430	444.4	959.5	1177.5	1134.1	301.7	869.5	1120.3	665.4	1120.5	801.1	766.1	831.5
BC0431	326.5	1318.6	1239.2	1108.5	791.1	1051.9	1897.3	581.5	1111.2	415.2	776.1	657.1
BC0432	1380.5	1412.9	1284.2	931.2	1605.6	573	448.5	705.8	863.6	667.1	744.9	647.7
BC0433	45.7	60.6	83.7	75	66.4	20.5	4.7	37.3	49.1	59.4	44.2	45
BC0434	57.9	19.8	29.6	19.4	24.8	25.2	18.2	83.2	31.4	19.2	23.6	56.3
BC0435	207.1	268.9	358.4	189.9	0	164.1	81.3	208.1	61.1	270.6	94.7	34
BC0436	231.7	180.4	354.2	333.2	62.1	218.5	242	187.7	269.9	283.1	297.6	284.5
BC0437	232.2	114.3	81.7	90.6	119.3	51.1	24.8	90.2	109.7	69.4	116.4	78.5
BC0438	2888.1	2359	2859.6	2785.5	1229.1	2463.3	3554.7	1677.1	2686.2	3117.3	2237.3	1756.2
BC0439	903.9	377.8	302.7	346.7	282.1	429.3	366.4	303.4	355.1	218.4	209	333.4
BC0440	8.4	9.4	6.3	8.4	2.4	2	3.1	8.4	4.1	3.3	3.5	8.4
BC0441	59.7	67.3	88.6	60	133.9	86.5	118.5	154	64.7	82.3	80.9	135.7
BC0442	5974.5	5517.8	5421.8	6029.8	5691.6	7593.8	4404.3	4595.1	3472.3	3992.9	3632.7	3135.5
BC0443	7783.5	9192.5	9750.5	10796.8	9195.5	14162.1	10667	8500.4	8138.5	9756.7	7374.3	8073.3
BC0444	3143	4816.8	5176.4	5963.1	5603.1	6046.5	4963.7	7188.1	4768.2	6048.3	5722.3	4962.3
BC0445	1760	2184.4	2156	2775	2041.1	2249.7	2420.2	1624	1589.5	2234.3	1202.5	1521.3
BC0446	198.4	305.9	419.2	366.2	307.2	307.5	339.6	235	225.2	177.6	217.8	254.1
BC0447	1203.6	701.8	657.8	578.9	596.6	617.7	792.3	516.9	633.4	493.5	537	660.3
BC0448	702.4	1949.4	2685.1	3258.1	1985.9	5172.9	2633.6	2779.5	115	225.2	194.6	200.8
BC0449	378.9	493.9	282.4	807.9	158.7	830.9	745.8	796.4	544.1	488.5	710.5	675.2
BC0450	1740.4	4912.1	3973.9	2931.9	6480	2962.1	4144.9	1575.9	8289.9	17246.8	13251.6	9836.8
BC0451	16805	15511.1	12809.1	10440	21869.2	17001.2	16867.6	6962.7	35331.1	70045.4	58322.2	52277.3
BC0452	7730.7	5396.8	5216.4	4364.7	4201.7	5829.7	9353.8	3594.7	13774.2	29960.8	21924	22589.2
BC0453	36	115.5	125.7	171.3	141.5	88.6	194.1	123.6	271.7	257.1	295.2	334.9
BC0454	150.2	115.6	22.9	84.2	10.1	9.9	60.4	56.2	57	20.2	52.5	50.7
BC0455	179.9	243.2	291.8	395.3	186.9	449.2	537	213.2	305.7	330.5	328.1	397.9
BC0456	79	79.8	67	78.4	41.6	36.6	35.1	71.8	87.8	139.8	53.6	15.6
BC0457	406.4	428	367.6	261.3	645	269	268.6	277.2	325.5	251	198.2	208.8
BC0458	101.7	230.7	128.3	299	80.8	154.9	29	85.4	167.3	22.1	99.7	117.9
BC0459	5.6	79.9	75.5	3.8	27.9	8.7	41.8	66.3	137.7	10.5	25.1	51
BC0460	402.6	408.5	419.9	345.4	0	3729.3	5179.5	1213.2	3074.8	8975	7256.5	6919.9
BC0461	52.1	18.5	8.4	8.2	38.7	0	13.2	49.8	6.3	8.8	15.5	6.8
BC0462	40.1	20.8	32.3	12.8	32.3	40.5	9.5	54.2	65.9	29.3	27.8	55.8
BC0463	21.2	44.7	27.4	27.6	72.2	21.3	40.3	28.9	15.2	9.7	36.9	81.6
BC0464	32.4	55.3	60.1	99.9	13.2	59.4	59.9	31.9	65.1	72.3	28.4	31.4
BC0465	235.7	860.4	1304.9	1755.2	129	1508.9	625.5	793.4	258.1	664.6	126.5	135
BC0466	429.1	534.5	752.2	871.3	575.8	668.1	491	503.3	483.8	280.8	485.2	416.5
BC0467	0	11.4	39.4	9.4	0	23.4	7.6	20.7	27.5	10.8	18.5	55.4
BC0468	284.4	159.3	124	145.1	83.7	109.2	77.7	181.3	266.9	305.9	222.3	324
BC0469	348.6	337.9	313.3	303	566.8	482.9	362	246.8	609.3	532.7	576.1	381.8
BC0470	66.4	65.3	84.5	49.8	33.2	45.1	69.2	50.5	133.4	99.6	136.5	105.1
BC0472	717.3	1654.5	2566.4	2442.7	387.4	4990.3	1902	3127	2357.7	2108.2	1750.5	1247.7
BC0473	327.2	107.3	96.1	107.9	165.2	129.1	202.5	126.8	279.2	161.4	134.3	215.7
BC0474	94.7	191.2	227.9	98.8	47.5	7.6	11.7	36.7	18.6	0	26.9	26.4
BC0475	745.2	289.7	246.3	261.2	27.4	87.5	136.1	38.2	22.3	51.4	30.7	83.4
BC0476	60.2	64.4	81	35.4	52.1	32.6	84.9	90.2	90	58.4	112.6	172.3
BC0477	20.1	29	9.4	2.6	22.1	26.2	22.1	41.5	16.7	5.2	24.7	28.4
BC0478	44.5	16.6	0	4.5	25.9	3.2	4.5	19.4	12.6	9.7	6.7	9.9
BC0479	17.4	2.9	0	22	0	0	0	36.6	0	0	0	9.8
BC0480	0	23.7	22.5	18.8	7.7	7	19.5	31.1	2.8	33.8	75	26.6
BC0481	34.5	51.6	43.1	36.9	120.2	42.7	15.3	68.1	37.4	70.2	68	56.6
BC0482	34	91.8	120.3	163.3	101.1	343.5	405	175.8	166.2	231.6	171.2	155.5
BC0483	461.5	420.4	388.5	412.4	450.5	327.2	56.4	66.3	201.1	248.7	189.4	152
BC0484	61	127.6	20.1	9.9	15.1	0	7.4	91.3	46.6	41.1	7.9	128
BC0485	108	56.1	6.6	0.7	0	100	16.5	21.6	46.5	22.4	0	0
BC0486	54.3	55.1	43.1	51.2	47.3	186.3	51.8	83.5	119.5	43.4	26.4	75.3
BC0487	16.4	55.5	10.9	3.5	41.8	138.4	5.2	14.3	57.8	1.4	22.1	17.5
BC0488	69.7	54.7	27.8	20.4	154.3	68.3	36.9	23.2	93.8	53.5	29.5	46.2
BC0489	11.7	99.8	39.3	89.4	105.3	92.6	54.2	50.9	80.7	57.1	40.6	40.5
BC0490	516.1	761	633.6	645.6	209.1	807.3	113.9	354.6	293.6	652.1	83.4	472.4
BC0491	1975.1	8405.1	11924.3	22758.1	8435	9621.9	4753	4889.6	34	50.4	24.2	47.1
BC0492	347.5	3415.2	5000.4	10672.6	2466.5	4909.8	974.7	2043.6	18.8	104.5	124.8	153.4
BC0493	929.5	801.2	886.1	771.1	821.9	1085.5	1295.5	581	885.8	1437.1	1620.5	1431.9
BC0494	543.6	1663.8	1067.7	1502.3	891.4	1269	718.3	461.2	2076.5	1606.2	1649.6	1105.7
BC0495	6528.7	5282.9	6003	6923.1	4191.3	12637.4	8371.4	7809.2	9909.5	9538.5	2782.9	10790.2
BC0496	332.5	538	402.7	304.3	366.8	648.9	543.5	520.7	702.8	468.6	506.5	754.6
BC0497	183.6	409.3	331.9	267.6	365	747.1	1109	603.1	657.6	519.2	442.8	577.1
BC0499	524.2	550	376.7	171.3	765.5	307.5	296.4	161.3	170	147.8	51.7	87.5
BC0500	1053.4	497.1	346.3	302.4	255.7	210.1	46.6	274.6	579.9	753.5	265.3	208.7
BC0502	0	238.9	122.9	184	98.9	193.5	353.8	68.6	175.1	155.9	282.8	39.9
BC0503	229.7	140.2	244.7	178.6	116.8	194.5	299.2	164.3	286.9	338.7	189.3	351.3
BC0504	55.9	22.6	8.3	36.1	33.4	18.3	7.5	44	34.7	37.7	19.6	25.1
BC0505	0	19	3.3	12.2	9	15.9	54.1	44.2	3.6	16.3	17.8	10.8
BC0506	290.4	266.4	572.9	446.6	127.1	266.8	1247.2	461.9	19.2	384.2	237	126
BC0507	0	159.9	221.1	114.1	116.9	743.7	831.5	838.1	2027.8	7827.9	8435.7	5939.4
BC0508	779.9	423.3	593.3	475.7	255.2	388.3	409.9	388.3	472.1	509.4	595	414.3
BC0509	38.9	45.1	54.1	50.2	54.2	34.2	113.5	53.8	75	31.5	101.4	51.4
BC0510	15.8	164	149.7	148.2	261.2	181.3	93.1	119.8	120.7	128.3	101.9	160.8
BC0511	1133.9	1412.8	2161.6	1498.5	1842.3	4509.3	5257.8	3571.3	3797	2207.2	2656.5	3681.3
BC0512	97	210.3	173.5	128.6	136.7	78	228.3	150.9	403.8	160.1	308.6	198.3
BC0513	4.4	10.2	4.9	5.9	0	2.1	5.7	14.6	5.8	9.3	8.2	7.8
BC0514	4.4	5.3	2	12.6	0	2.3	7	18.4	4.4	10.5	14.4	11
BC0515	9.7	11.4	6.9	4.6	19.8	25.6	0	19	10.4	2.2	10.3	5.7
BC0516	6	21.3	52.1	8.3	22.2	10.3	0	45.8	10.5	0	22.4	18.1
BC0517	193	362.5	293.4	336.3	516.8	672.9	220	286.7	444.3	633	317.8	306.6
BC0518	2687.1	2196.7	2962.9	3204.6	1799.5	2343.4	2642.6	2586.7	1592.2	2216.4	1394.6	1755.7
BC0519	76.4	238.8	284.8	347.1	272.4	454.7	641.4	340.1	201.6	272.5	221.1	173.4
BC0520	1476.5	1963.8	2506.4	2363.4	1654.3	4257.7	4007.7	3293.8	3565.2	3190.9	1434.8	2769.6
BC0521	507916	273762	219455	183242	1.07102e+06	329680	387119	139109	190952	127331	278908	313620
BC0522	2.74237e+06	1.46929e+06	1.03082e+06	1.00314e+06	3.65835e+06	1720290	1.82217e+06	725996	772505	631368	1.09055e+06	1191981
BC0523	70831.5	9434.2	16801.3	21927.6	11613.1	27133.2	27751.9	95013	43115.4	81684.3	33405.1	83032.2
BC0524	214344	91117.7	93252.1	49574	105135	234061	213023	475104	436830	816000	263460	325915
BC0525	20978.4	3840.6	7430.5	6077.6	10414.5	8484.7	14548.7	40873	10563.9	11831.8	9753.1	17913.2
BC0526	24630.3	7214.7	9257.2	7107	9172.3	15990.1	15225.3	67434.8	20897.8	19644.6	34438.9	31494.5
BC0527	63752.2	11984.6	29752.8	26684.8	15684.8	32860.2	39276.4	108911	25070.2	31967.6	24389.7	40453.6
BC0528	72683.1	17990.4	29800.9	28550.7	26372.9	40267.2	45600.2	175155	48232	45605.3	33322.9	99502.9
BC0529	18922.3	4893.3	13029.1	9517.8	6449.2	9287.8	11668.5	35131.1	13040.2	10681	15088	23558.9
BC0530	42399.2	7737.9	14001.5	14027.7	4986.5	18175.9	19958.6	35807.1	21809.7	28699.2	13249.3	55112.5
BC0531	94126.1	14474.7	19065.9	17841.9	9747.8	26694.6	29969.5	191820	40862.2	42229.5	42538.4	74096.4
BC0532	210189	26354.3	37958.8	44117.6	52432	109197	94687.3	363652	110176	322856	109202	232030
BC0533	29947.8	6531	9933.4	8483.1	7842.4	14029.6	10743	48285.7	26318.2	19863.7	30344	37584
BC0534	21075	4175.9	6229.6	5499	8114.6	10534.9	8409.9	94069.2	23361.1	31834.3	22540.5	45108.5
BC0535	119373	20264.9	26086.5	29794.6	17177.4	45916.7	58158	247041	51192.4	57894.7	65182	93871.3
BC0536	19258.4	4579.2	6729.2	8159.9	4823.8	6295.9	9997.3	52367	13069.2	17780.7	13968.8	23675
BC0537	65908.9	6750.7	7499.8	10657.5	5724.3	10428.6	17066.5	165401	23332.5	32659.1	11626	37263.1
BC0538	189.2	467.5	606.1	615.5	67.2	720.2	53.7	260.7	212.7	267.3	304.9	189.2
BC0539	1903.9	1784.6	1822.3	2402	1074.9	1503.4	2247.9	966.6	1972.4	2338.6	1527.9	1384.6
BC0540	389.9	775.1	629.3	651.5	102.8	363.4	662.7	422.9	332.7	564.4	693.9	614.8
BC0541	221.8	237.8	176.5	130.4	148.2	314.9	131.6	163.2	71.2	124.6	71.2	93.5
BC0542	158.5	266.8	152.6	189.8	613.9	423.2	171.2	150.5	48.5	20.4	32.5	55
BC0543	381516	59675.2	72370.6	81197.8	40777.4	189520	167122	776860	205555	484733	181030	339780
BC0544	59.5	108	119.7	101	123.3	80	15.7	87.7	52.7	37.8	23.7	54.7
BC0545	343.9	49.6	41.4	46.5	32.2	62.9	44.3	56.1	81.2	36.4	32	47.3
BC0546	88.9	174.4	183.8	239.9	107.9	162.6	15.5	179.4	248.1	163.9	93.2	57.3
BC0547	90.4	44.7	42.9	20	47.4	15.9	24.3	40.6	26	67.3	21.2	29.2
BC0548	16.4	49.5	80.8	52.1	15.5	25.7	192.5	76.8	36.7	142.8	187	94.7
BC0549	0	39.1	23.9	9.6	63.1	0	18.4	28.7	79.4	0	16.4	7.8
BC0550	0	102.3	39	40.5	0	0	128.2	25.3	29	453.1	104.3	65.1
BC0551	59.9	145	78.4	92.8	189.8	233.4	117.1	111.9	248.8	244.2	127.9	89.4
BC0552	256.4	92.6	42.2	54.6	294.3	54.8	65.1	48.2	48.3	28.3	53.4	62.3
BC0553	17.5	51.6	129.3	81.6	99	124.8	58.5	74.4	169.8	134.2	248.3	119.4
BC0555	27.6	55.3	67.9	34	22.8	17.7	59	54.9	26.2	17	30.2	29.8
BC0556	10.7	19.6	20	10.4	13.3	9.6	23.6	21.5	13.7	5.7	19.6	20.2
BC0557	234.5	1340.7	1817.1	1521.7	1777.9	4537	2043.2	2133.3	1169.1	1136.5	946.5	902.9
BC0558	4553.6	3315.7	5188.6	5880.1	5205.5	12465.1	8023.7	4351.3	5284.1	4869.4	4358	5306
BC0559	4.4	21.6	11.5	5.5	11.9	16.6	10.2	21.5	9.2	23.1	11.5	20.4
BC0560	212	195.7	147.4	170.1	218.7	89	25.3	142.3	234.6	216.9	105.1	122.1
BC0561	393.4	362.7	437.6	333.2	469.1	375	54.1	184.2	311.3	227.6	312	210.5
BC0562	190.4	29.8	20.8	44.6	11.4	73.9	16.7	30.3	50.9	13.8	17.5	29.5
BC0563	0	35.5	21.3	23.9	14	15.8	0	39	27.6	132.8	11.2	9.6
BC0564	8.2	7.7	4.4	3.4	11	17	5.4	14	4.9	3.3	10.3	15.6
BC0565	640.1	683.8	598.8	783.8	524.6	607.7	363.2	349.7	714.2	837.4	886.6	1133.1
BC0566	7.9	16.6	4.2	4.6	7.4	10	10.1	35	14.9	0	40.4	25.3
BC0567	9.4	22.2	5.9	7	7.2	3.4	2.5	36.7	9.1	1.5	4.4	6.8
BC0568	17.4	21.5	7.5	11	4	10.1	6.9	18.9	0.9	3.8	3.6	9.3
BC0569	42.8	18	4.5	5.1	9.1	0	13.4	36.9	7.7	8.4	15.9	17.1
BC0570	31.8	41.3	15.9	13.7	21.6	8.8	11.5	44.4	18.3	75.5	49.5	44.2
BC0571	277.6	89.5	222.4	108.2	181	260.3	121.6	202.4	126.9	39	87.1	141
BC0572	294.3	77.5	39.5	79.4	109.3	133.5	56.9	108.4	109.9	116.3	214	109.1
BC0573	175.7	155.8	109.1	88.5	190.9	186.5	93.7	88.9	109.9	232	284.2	205
BC0574	178.9	34	19.4	19.8	33.6	69.4	39.4	67.1	31.7	14.1	36.2	46
BC0575	16.4	16.3	5.8	15.7	12.7	19.7	4	31.8	41.1	25.4	40.3	81.1
BC0576	2.1	20.8	14.4	17.6	5	10.8	38.7	27.7	17.1	45.5	32.5	61.1
BC0577	5.4	29.3	10.3	10.7	13	17.6	18.3	26.4	28.8	4.6	18.4	17.2
BC0578	0	12.8	26.2	11.2	21.9	30.3	58.1	19.8	19.6	8.2	10.2	13.5
BC0579	95.8	22.7	17.3	12	21.4	23.3	32.1	70	18.4	58.6	28	37.3
BC0580	4.6	20	4.3	25.8	3.6	9.7	2.5	18.2	22.7	20.1	7.3	20
BC0581	27.6	57.7	47.7	67.3	45.8	73.2	155.9	140.1	293	339.4	498.1	665.6
BC0582	261.7	168.9	140.3	159.2	176.7	189	100.9	132.1	147.1	82.5	79	171
BC0583	59.1	35.5	11.1	16.8	37	6.8	18.9	27	27.4	14.7	19.8	23.6
BC0584	16.8	72.8	104.6	130.5	7.3	13.3	23.7	22	102.2	122.4	36.6	9.9
BC0585	39.8	73.4	68.8	98.3	61.8	75.3	81.8	64.5	132.6	123.5	93.9	106.8
BC0586	179.7	49.7	75.2	48.9	89.2	194.9	97.8	50.8	158	53.5	29.3	32.7
BC0587	114.4	43.2	25.8	75.2	42.6	30.8	41.3	32.9	12.4	10	24.6	91.7
BC0588	34.6	127	128.5	117.5	85.8	40.6	60.1	111.2	32	79.6	75.7	50
BC0589	1603.7	2120.8	2316.6	2634.8	2237.1	3645.6	3377.6	2937	1553.2	1159.2	1148.3	1613.6
BC0590	1519.1	1265.7	1866.3	2201	1321.4	4653	3633	2388.7	1752.7	1041.8	1101.8	1513.3
BC0591	44.1	62.8	84.3	74.3	90.2	72.4	67.9	87.6	76.2	93.9	108.6	78
BC0592	1322.6	2183.6	2818.6	5380.5	1060.4	2336.5	1435.3	1002.2	1763.4	744.7	1103.7	1542.7
BC0593	713.9	920.2	1181	1970.5	1063.8	727.7	796.9	751.7	866.2	558.2	641.6	1100.6
BC0594	127.8	146.8	104.5	126.1	47.4	49.6	46.8	39.1	103.4	15.7	112.6	32.5
BC0595	239.2	498.7	267	313.2	614.4	294.2	91.2	61.8	173	86.6	207.4	98.4
BC0596	1873	1124.8	985.5	1158	1184.6	1579.5	914.2	790.3	569.1	356.6	361.4	403.5
BC0597	50.4	93	93.5	74.7	66.3	81.6	44.4	82.5	302.6	148.8	280.2	184.5
BC0598	8124.7	4152	3835.7	3305.2	5266.6	4403.5	3219.2	2048.8	5161.9	4342.3	2970.7	3229.8
BC0599	1997.7	1815.9	1433.4	1487.1	3820	1556.3	1454.1	538.1	2248	3074	2198.7	1525.3
BC0600	2972.8	3912.4	4745	5644.1	3220.7	6225.6	6459.7	4269.8	4474.4	5653.4	6292.8	4277.2
BC0601	4487	2123.2	1421.3	1072.6	3127	1541.8	1116.9	877.3	1804.1	1675.9	1079.4	925.3
BC0602	1110	1101.6	1182	1035.3	2286	1886.2	1752.4	1082.2	1726.4	1453.2	1080.8	1290.3
BC0603	250.2	260.3	290.2	277	199.1	491.3	751.6	504.4	603.2	422.5	371.2	833.2
BC0604	136.9	193.6	229.3	129.9	303.7	43.1	132.5	57.5	384.9	328.4	370.1	29.7
BC0605	439.6	286.8	364.3	517.9	264.2	769.5	617.5	397.5	698.7	673.2	871.1	1007.5
BC0606	1196.3	904.7	637.7	691.3	850.9	724.2	555.6	365.7	1195.6	815.7	675.2	739.7
BC0607	18.3	71.9	36.7	67.8	74.8	50.5	95.4	66.4	77.5	83.7	61.7	131.8
BC0608	36.6	22.4	8.7	12.8	20.4	32.2	36.8	17.4	11.2	30.4	27.4	52.7
BC0609	10.7	29.2	18.8	31.8	11.2	5.4	58.2	21.4	22.6	19.3	16	26.7
BC0610	27.1	59.3	36.1	39.7	34.1	21.9	17.7	31	11	30.4	38.5	25.8
BC0612	200	456.8	1250.8	3783	1466.3	8704.8	5826.3	7227.6	120.4	250.4	125.6	262.5
BC0613	311.6	878.6	929.2	872.1	88.4	1214.6	2186.9	939.5	1508.2	2669.7	2603.4	1987
BC0615	199.1	157.8	150.2	231.7	21.6	67.7	134.2	109.9	106.6	140	57.4	55.4
BC0616	359.4	269	351.7	480.4	213.7	687	96.1	265.5	357.1	137.3	414	267.3
BC0617	160.2	133.7	253.9	198.2	105.9	96.5	180.3	143.7	176	171.5	148.4	143.6
BC0618	212.2	220.8	211.5	192.9	211.7	84.1	204.9	185.1	157.3	120.3	112.2	157.9
BC0619	861.1	760.7	561.3	759.8	410.4	767.3	1324.6	601.3	639.3	233.3	635.6	708.5
BC0620	18.9	61.5	36	44.3	57.3	51.4	11.6	84.1	60.5	44.1	50.1	51.5
BC0621	1680.1	1086	1122.7	1669	1536.8	1244.8	1305.4	853.4	1029.5	577.6	937.9	1147.3
BC0622	1864.9	1451.7	1719.6	2230.3	1186.4	2650.1	2195.1	2322	1851.1	1444.9	1652.1	1907.8
BC0623	57.1	10.6	11.7	65.5	59.5	9.5	48.4	98.1	39.5	0	82.5	99
BC0624	186.3	47.6	14	44.9	40.9	25.4	24.9	33.9	49.1	41.1	37.9	53.1
BC0625	14.3	25.9	29.9	44.4	66.2	2	6.7	79.2	18.8	59.3	50.2	36.8
BC0627	60.4	18	216.6	55.7	0	117.3	63.6	66.3	76.1	0	166.3	143.4
BC0628	39.9	32	39.4	32.5	45.3	16.2	107.1	34.4	15.4	20.1	23.3	26.9
BC0629	6.4	18.8	13.5	14	8.2	70.1	18.9	25.9	56.7	49.4	48.4	42.5
BC0630	101	234	294.4	394	183	174.2	314.2	230	214.9	241.7	124.2	108.3
BC0631	49.5	82.7	48.8	75.3	76.1	133.5	41	78.8	57.8	50.3	66.7	54.8
BC0632	128.7	118.8	91	76	87.2	192.8	154.6	820	246.4	176.9	110.8	425.1
BC0633	23	18.9	16.5	1.6	2.1	33.1	13.5	21.7	24.3	3.8	13.9	25.5
BC0634	31.8	6.5	2.3	10.4	3.4	12.5	13.5	40.1	11.5	7.3	7.5	22.1
BC0635	17	17.7	16	24.2	36.5	58.9	12.2	54.7	33.4	26.8	15.3	30.3
BC0636	40.2	15.1	11.3	3.8	22.1	9.3	53.2	50.8	6.1	20.7	14.4	28
BC0637	1148.6	897.6	1169.2	1214.1	849.4	2148.9	1818.1	827.3	541.6	893.8	427.2	765.3
BC0638	563.9	722.4	758.7	493.1	784.9	1053.3	2083.8	903.5	8307.7	3567.5	3351.4	4463.3
BC0639	21	7.5	3	17.7	2.4	9.6	9	51.2	16	6.6	43.9	31.8
BC0640	5	11.6	5	10.1	4.7	2.3	112	38.1	34.2	9	70.3	52.9
BC0641	0	16.9	0	9	0	11.6	0	24.8	26.8	0	12.6	9.8
BC0642	7.5	14.8	2.8	0	1.9	27.2	18.2	20.1	49.7	35.7	41.8	78.1
BC0643	610	276.6	274.2	286.8	191.2	85.9	188.2	176.1	177.3	107.6	124.1	168.3
BC0644	284.9	330.9	307.9	381.9	269	960.1	173.9	285.2	220.2	216.1	189.1	132
BC0645	136.9	82.1	65	22.1	78.5	69.1	86.9	176.4	69.2	21.3	71.7	148.6
BC0647	7.4	7.6	6.5	4.7	0	3.2	21	16.5	11.6	11.4	12.9	7.5
BC0648	16.2	16.3	3.7	13.5	10	8.6	13.9	38.5	29.6	2.5	14.1	20
BC0649	9	17.3	17	21.1	10.1	8.6	96.6	21.7	27.8	0.1	11.8	6.6
BC0650	0	67	37.9	56.8	64.5	85.8	17.6	44.1	116.2	116.8	163.4	82.1
BC0651	93.5	229.7	427.7	463.2	147.1	272.5	550.9	167.4	71.3	69.4	48.8	52.3
BC0652	41.7	721.3	813.4	962	195.1	509.4	167.1	182.4	26.7	51.2	41.2	49.1
BC0653	224.2	1339.4	2578	2968.8	708.2	1192.8	1132.2	502.1	23.6	55.1	49.3	48.6
BC0654	46.1	48.5	58.5	108.6	40.2	38.9	28.8	45	36.7	28.6	35.9	49.8
BC0655	319	277.1	404.4	293.2	169.2	211.8	167.4	314.9	161.1	300.2	201	162.5
BC0656	6.1	25.2	15.4	43.4	26.6	15.7	0	54	82.5	40.9	85	72.3
BC0657	41.4	78.1	69.1	24.2	68.7	118.4	329	60.8	29	63.3	43.7	13.6
BC0658	30.6	41.3	65.1	78.7	83.2	177.8	31	136.2	60	100.4	60.9	95.7
BC0659	158.7	92.4	72.1	43.5	100.6	85.5	286.4	105.9	123.8	118.7	51.3	83.8
BC0660	65.4	57.9	90.2	100.3	191.1	152.8	121.5	73.8	118.7	62.1	73.2	56.6
BC0661	205.7	44.8	73.4	71.9	184.3	67.3	128.3	75.2	168.2	59.5	69.4	127.7
BC0662	222.9	108.1	99.3	137.1	130	140.9	150.5	143.9	97.8	47.5	120.3	107.2
BC0663	175.5	161.6	128.9	270	206.8	191.3	69.7	134.9	63.1	8.6	54.7	129
BC0664	2934.4	2450.1	3111.5	3287.1	2661.6	3591	3254.9	1584.8	3370.7	4980.7	3654	3491.2
BC0665	1567.9	2201.7	2431.6	2461.8	2569.1	3272.5	2708	1937.7	2527.3	4122.2	2994.9	3003.6
BC0666	5866.1	1643.6	1886	1454.9	1140.5	912.7	877.6	735.6	332.7	116.9	56	117.2
BC0667	70.2	123.4	255	169.4	148.3	111.9	94.1	91.7	62.2	58.5	151.6	97.8
BC0668	1026.8	1995.9	2409.4	3285.5	1390.7	2114.9	1796.5	1232.9	87	106.4	129.7	88.8
BC0669	12	10.1	31.5	0	5.8	5.2	0	35.2	35.9	31.9	6	10.2
BC0670	175.4	34.8	38.8	1	0	4.5	3.2	29.6	20	4.1	9.5	13.2
BC0671	34.1	42	13.5	15.9	57.5	18.3	89.5	46.1	21.5	9.2	15.2	34.2
BC0672	82.1	146.1	249.9	206.9	157.2	78	260.8	219.8	571.2	293.9	667.5	739
BC0673	229.6	214.6	283.3	186.1	325.4	478.7	624.7	433.8	695.7	863.3	1117.8	1498.4
BC0674	38.9	24.2	16.1	16.9	24.4	22.5	15	36.4	16.7	10.9	41.5	20.9
BC0675	27.1	18	61.7	32.2	0	9.5	29.3	19.4	19.6	0	13.4	12.9
BC0676	377.5	254.9	257.9	76.8	136.4	484.3	478.1	790.1	1279.5	1277.7	846.9	1155.4
BC0678	79.5	27.1	17.9	22.5	33.3	22.8	29.5	54	15.7	24.9	30.6	28
BC0679	400.9	248.5	246.7	346.6	538.3	166.8	721.1	192.8	1688	951.4	1063	535.2
BC0680	78.7	118	133.9	59.1	165.5	59.4	178.4	207.2	56.7	149.8	23	60.8
BC0681	68.4	69.2	172	81.3	78.6	129.7	113.5	105.4	20.4	31.9	54.7	23.5
BC0682	137.4	401.2	327.1	305	304.9	198	387.8	305.7	239.9	279.5	189.4	327
BC0683	217.9	10.9	6	6.8	21.3	18.6	7.5	26.6	8.9	5.1	12.4	16
BC0684	61	26.1	23.5	31.4	23.6	24.1	29.9	75.1	12.4	16.5	18.2	37.8
BC0685	6.6	19	4.2	12.5	4.4	7.7	0	21.9	12.9	15.6	3.3	14.8
BC0686	767.7	652.9	659.6	1104	638.6	672.4	560.5	458.4	527.8	547.4	363.7	500.5
BC0687	49	124.3	84.8	85.5	81.1	161.9	33.4	69.2	42.8	34.2	21.3	39.4
BC0688	177.8	47.7	53.9	27.5	160.3	237.4	97.1	145.9	315.9	335.2	124	158
BC0689	105.2	63.7	96.3	138.2	60	69.4	29	48.4	55.1	47.8	47.9	47.1
BC0690	206	211.4	174.9	199.2	557.7	756.1	332.8	219.5	230.6	67.4	289.4	268.1
BC0691	0	40.1	6.6	85	21	4.5	0	38.9	25.6	34.9	10	61.5
BC0692	843.9	448	744.6	636.9	325.4	711.6	496.5	578.6	1098	413.6	674.6	709.8
BC0693	135.1	129	176.5	158.1	146.8	105.6	201.4	94.8	193.8	203.4	135.9	115
BC0694	31.2	38.1	49.4	28.4	30.6	55.1	51.6	52.1	63.5	41.5	58.9	47.3
BC0695	2582.8	2836.4	3514.6	6354.3	1138	5930.3	5503.4	4626.1	1954.8	2999.8	1218.2	3152.6
BC0696	1160.7	1213.4	1309.3	2546	457.5	959	1510.7	742.2	224.1	424.2	261.4	289.7
BC0697	1518	2512.6	2512.8	4435.1	1546.6	2268.7	1163.3	759.2	183.7	91.9	143.1	169.9
BC0698	1302.9	2791.1	3002.6	4975.5	3485.6	3211.9	1204.4	1778.2	116.8	71.2	77	141.7
BC0699	96.3	58.1	67	91.9	55.9	39.2	46.1	28.5	49.8	14.9	30.6	18.4
BC0700	68	200	191.9	374.4	196.3	164.6	34.9	253.9	97.5	81.4	125.2	128.3
BC0701	277.3	95.3	151.7	65.2	87.8	164.9	160.7	175.8	931.6	497.8	681.5	574.8
BC0702	0	181.3	70.4	70.9	83.9	95.5	1.2	365.2	578.3	152.5	218.5	274.2
BC0703	1225.8	797.5	1006.1	892.8	1002.4	1502.1	1487.3	1091.2	1878.2	921	899	1624.7
BC0704	16.9	17	22.2	9.7	8.2	5.4	17.5	53	10.7	18.5	25.3	45.2
BC0705	43.9	29	10.8	10.8	71.5	24.2	22.7	43.8	17.1	33.7	17.2	29
BC0706	18.5	16.1	11.8	7.6	4.1	5.7	89.6	29.6	14	31.5	9.3	62.2
BC0707	279.1	157.2	213.1	208.3	210.3	344.4	448.4	441.6	387.5	393.1	173.6	665.4
BC0708	0	65.9	81.3	61.8	64.9	62.8	62.9	133.1	37.6	14.1	13.5	17.3
BC0709	100.3	96.6	112.9	12.7	57.8	115.4	0	63.4	3.1	17.5	8.2	58.3
BC0710	14.8	12.5	14.5	14	8.7	31.9	10.9	47.2	9.1	49.8	18.3	39.4
BC0711	18.9	8.8	12.5	5.1	8.5	12.2	12.9	21.1	7.5	1.9	31.1	14.2
BC0712	45.7	21.1	14.5	10.3	42.1	10.5	33.2	29.3	10.1	8	16.2	14
BC0713	0	37.8	11.6	22.4	65.7	23	29.3	155.2	49.9	29	85.1	109.5
BC0714	133.5	120.2	158.9	89.2	176.9	143.9	191.4	121.4	119	91.1	97.7	88.4
BC0715	485032	265173	219272	186710	1.02966e+06	339040	412503	141564	196395	125180	264896	325659
BC0716	2.561e+06	1.45772e+06	1.02403e+06	1000077	3.54801e+06	1.70346e+06	1806311	685074	753019	623343	1.06868e+06	1.18424e+06
BC0717	52584.7	9014.3	10272.6	9185.5	9370.4	15095	19432.4	79662.4	23185.5	28974	38616.6	40272.9
BC0718	64832.4	11603.8	11955.7	8191.7	8529.8	20224.8	19122.3	185369	33537.8	24650.7	37944	42742
BC0719	20697.7	3381.5	5571.6	4009.7	6228.8	8316	10861.7	80138.5	19222	27732.9	18346.4	34355.4
BC0720	5535.5	2421.6	3498.3	3062.7	3436	5728.9	4503.5	17042.1	8324.2	7927.6	6345.1	14142
BC0721	9194.6	2339.8	2986.9	3371.3	2719.8	5062.9	6124	37781.8	3063	7204.9	2862.4	15423.1
BC0722	117063	20365.7	36921.4	42092.1	14858.9	50616.6	58154.9	221849	71168.7	78457.8	62099.5	128126
BC0723	28167.6	6056.1	20488	26252.9	5240.3	17416	19476.2	38698.9	35820.7	38468.3	11441.2	52920.6
BC0724	16192.4	2300.5	5277.6	4936.1	4254.8	6193.6	7020.1	14913.6	4038.6	5695.5	5186.6	10579.2
BC0725	17675.5	4866	6608.9	4458.8	5643.7	7770.6	9610.7	26292.9	5332.7	6294.2	8127.7	11479
BC0726	9597	2440	4090.8	3439.9	1850.3	7422.3	6710.1	12506	4309.1	3226	4585.5	7360.3
BC0727	969496	199923	210183	165258	103405	377649	412109	2.35682e+06	932955	2.2996e+06	446672	1.7088e+06
BC0728	900814	197003	219497	168592	105350	378922	377877	2.33193e+06	1.09324e+06	2.5103e+06	502984	1.88764e+06
BC0729	50906.8	9872.7	16127.8	14777.9	14368.1	23671.8	26099.7	110429	23695.6	35779.2	25651.2	38166.1
BC0730	70857.7	17878.2	23986	23268.1	27163.4	38253.7	44106.1	191436	52948	54684.1	36375.9	117928
BC0731	20034.9	4852.4	6469.9	5327.6	4759.8	5448.9	5876.6	41281	14654.7	12619.3	24429.6	18926.3
BC0732	10912	1078.9	2564.9	1910	1752.7	795.2	1796.5	6207.6	1325	2079.4	1594.4	4567.1
BC0733	64259.5	3225.7	7216.6	7757	6676	18646.7	15730.9	97727.9	8270.8	27600.2	7604	23034.2
BC0734	20693.5	4193	7376.1	7359.6	3389.4	10352.2	13773.8	27890.4	12866.5	13483.4	17774.3	19006.3
BC0735	62493.5	6302.7	10884.2	12939.9	8361	20655.1	17365.3	84215.2	21852.3	37141.5	24566.5	39578.3
BC0736	7865.8	571.5	1793.2	2576	810.8	928.3	1641	3487.2	1710.7	2016.6	782.2	2663.3
BC0737	476.6	247.4	187.4	535.6	230.7	31.9	538.5	241.9	585.4	1081.1	712.4	462.4
BC0738	289.1	321.5	331.4	265.8	244.7	266.6	109.9	154.2	316.5	330	350.1	152.2
BC0739	107.8	146.9	66.3	165.7	68.5	34.4	186.4	31.7	37.4	42.8	36.2	55.4
BC0740	326.9	482	403.8	422.9	508.8	331.1	148.3	174.5	143.4	61.6	75.1	106.4
BC0741	8164	3122	3565	3947.1	457.4	6884.9	3875.5	4625.7	5021.9	3937.9	3271.1	2973.7
BC0742	2202.6	1407.6	1444.2	1122.6	1225.1	792.2	615.9	746.3	1315.2	1132.7	1403.5	1170
BC0743	2596.2	2242.8	2341.2	1996.9	2643.7	1504.8	1824.2	974.8	2106.7	1340.1	1387.1	1956.8
BC0744	1765.3	1527.4	1293.2	1538.8	1114.3	1819.9	1636.4	785.2	1296.5	1170.2	1114.6	1305.4
BC0745	2803.7	1768	1552.1	1305.7	2107	2148.8	3297.4	1138.3	1451	1059.6	1191.2	884.7
BC0746	1694.8	781.4	775.6	730.6	1639.5	701.1	830.4	707.2	692.5	409.4	737.6	566.2
BC0747	4828.5	1958.2	2333	2047.9	2784.9	2356.9	1690.4	1480.5	1947	1482.1	1867.4	1823.3
BC0748	4205.7	2317	2477.2	2675.2	3236.8	4910.7	2698.6	2801.1	2330.9	1399.3	2037.8	2749.6
BC0751	4697.9	2626.9	2527.9	2955.5	2251.1	5080.8	3761.5	2978.6	2206.8	2061	2557.8	2700.8
BC0752	13	110.1	74.7	35.3	46.9	542.1	0	89.7	37.2	108.7	64.5	95.8
BC0753	75.1	5.8	7	3.6	1.1	6.6	7	30.9	21.9	2.2	16.7	5.1
BC0754	14.7	33.7	9.8	23.5	21.1	23.2	25.7	37.1	47.3	25.9	11.8	23.7
BC0755	28.5	60.9	133.6	113	48.3	267.5	178.1	122.8	193.3	246.1	251.5	225.8
BC0756	15.7	38.6	56.8	48.3	1.6	107.5	45.5	59.6	86	67	93.4	71.6
BC0757	16.6	22.5	10.6	4.5	33.5	6.3	16.1	25.9	13.4	8.5	26.1	31.1
BC0758	24.7	89.4	31.9	87.4	18.1	17.4	124.9	77.8	24.2	69	46	27.3
BC0759	0	73.2	293.6	133.2	69.7	43	153.2	62.2	95.9	50.8	86.1	32.7
BC0760	0	84.5	69.2	82.1	193.9	11.1	81.2	61.5	78.1	203.9	169.1	29.6
BC0761	20.2	10	1.4	3.5	0	8.6	14.3	27.3	4.3	25	8.4	5.1
BC0764	121.4	66.4	61.1	107.1	61.8	65.6	169.8	247.1	51.3	31.9	18.9	61.2
BC0765	108.1	88.7	90.7	54.7	18.7	8.4	90.5	98.3	57.9	52.7	66.3	35.3
BC0766	4.2	41.5	31.6	48.7	106.8	160.2	210.7	152	379.2	326.1	384.4	474.5
BC0767	61.9	172.5	172.8	249.5	71.2	316.1	407	276.2	494.6	510.8	462.9	535.5
BC0768	3.7	13.7	17.5	27.4	13.5	27.7	52.3	28.7	165.7	139.2	288.9	259.4
BC0769	16.7	15.4	19.8	12.8	9.2	24.6	101.2	21.8	13.3	9.6	18.8	29.5
BC0770	50.6	24.5	25.5	11.8	22.7	10.5	104.5	41	15.5	9.9	23.2	55.6
BC0771	14.7	20.6	33.2	54.1	7.2	6.3	82.3	3.6	24.5	0	26.9	55.4
BC0772	33.4	38.3	51.6	30.3	6.2	39.7	33.7	11.2	20.5	0	57.6	50.8
BC0773	79.5	106.5	84.3	40.5	24.9	63.5	128.8	47.1	138.1	109.9	74.8	134
BC0774	220.7	15.1	21.3	15.1	36.8	18.1	11.2	24.8	18.9	19.4	16.5	36.9
BC0775	6.5	26.8	13.7	13.9	21.8	21.9	38.7	39.9	29.8	9.1	12.4	17.2
BC0776	10.5	44.9	22.7	57.1	73.1	41.8	24.9	51.6	38.3	31.2	60.1	46.5
BC0777	20.8	272.3	186.2	101.1	217.8	821.5	358.6	432	623.5	477.5	335.6	823.6
BC0778	27.4	162.5	217.1	149.9	243.3	297.1	95.9	206	342.3	102.8	144.3	375
BC0779	20.5	143.5	208.1	107.9	93.5	87.2	309.8	91	178.2	150.2	207.9	19.1
BC0780	0	23.7	59.2	96.2	15	0	0	12.2	99.7	77.6	5.6	40.4
BC0781	676.8	798.7	937.1	1270.5	444	1514.4	877.8	1197.4	1930.4	2510.7	1568.8	1718.6
BC0782	26.7	32.2	49.8	36.5	17.2	34.1	145	55.3	37.2	73.7	10	35
BC0783	3.8	5	5.9	8.3	5.9	3.3	3.2	18.6	3.2	4.9	29.5	11.3
BC0784	8.9	9.5	11.3	4.6	13.2	1.2	13	16.1	16	3.6	21.4	21
BC0785	41.6	18.7	3.7	10.5	8.7	19.1	6.1	16.9	9.1	13.7	18.2	21.5
BC0786	624.4	792.9	1003.6	896.7	615.8	1470.5	2548.6	1494.7	3308.6	4055.7	3694.2	3256
BC0787	8.3	12.5	19.2	7.3	17	18.7	4.4	53.9	32.5	8.9	52	23.7
BC0788	44.8	29.5	48.3	39.1	40.9	8.7	57.6	72.2	63.4	63.8	52.6	52
BC0789	269.2	301.9	352.4	222.6	156.3	122.1	132.4	145.2	249.5	210	232.6	289.8
BC0790	176.6	201.5	157	232	316.5	127.3	58.2	84.4	81.5	227.9	161.5	137.5
BC0791	50.8	28.1	30.2	13.4	51.8	20.3	55.9	50.3	17.4	23	27.3	31.3
BC0792	521.6	904.5	811.1	801.1	108.8	1301.9	463.2	792.2	694.5	532.9	382.5	782.6
BC0793	41.3	40.8	41.1	31	49.9	107	25.9	47.9	15.4	12.7	29	44.8
BC0794	7.6	12.1	8.9	7	12.9	18	7.5	35	20.5	17.2	7	24.8
BC0795	0	6.6	3.7	0	0	8.3	26.5	18	3.5	4.8	2.9	13.4
BC0796	17.4	13.4	2.5	5.6	6.3	0	0.7	30.2	5.7	5.8	10.7	4
BC0797	0	5.7	0	2.8	0	0	16.3	19.6	10.9	18.1	3.8	33.5
BC0798	27.3	9.8	6.4	13.5	8.7	7.8	17.2	29	8.7	3.8	2.8	15.7
BC0799	56.8	66.4	52.7	11.4	40	107.2	76.6	37.1	74.4	5.9	48.2	72
BC0800	241.8	248.9	356.7	510.4	270.4	506	340.4	575.5	185.1	260.4	179.4	148.6
BC0801	409.3	164.9	117.2	213.1	216	131.6	121.1	109.6	225.2	166.9	206.5	153.8
BC0802	39.8	127.5	173.7	227.2	72.2	96.2	207.7	138.7	42.7	12.5	45.3	77.4
BC0803	7.5	22.2	19.2	12.1	29.5	35.4	51.1	26.5	30.9	38.4	43.5	18.8
BC0804	171.3	58.7	106.7	50.9	58.3	56.2	236.7	99	145.1	218.5	134.8	128.2
BC0805	200.6	323.4	414.1	489.6	411	391.1	370.6	224.8	150.6	169.2	180.4	237.8
BC0806	38.4	108.3	104.3	81.3	200.7	67.2	56.6	43.5	114.4	140.1	108	99.9
BC0807	172	365.1	345.9	502.1	235.5	121	81.6	286.2	107.7	177.6	90.7	196.5
BC0808	369.9	248.7	435.6	773.2	123.8	161.5	154.7	301.9	135.8	177.5	70.3	114.5
BC0809	234.5	83	115.3	150	37.1	125.3	66.1	104.4	52.7	17.5	24.5	39.2
BC0810	0	37.7	59	127.8	0	179.8	89	57.8	57.7	79.4	40.2	30.4
BC0811	166.2	125.7	96.6	137.1	142	129.5	83	194.1	98.8	98.2	204.5	102.6
BC0812	4.5	8.9	0.9	1.2	2.2	6.3	6.2	27.7	24.2	1.8	17.2	7.8
BC0813	5538.4	693.9	1582.6	1437.3	921.3	2910.8	1676.8	1093.4	3586.2	1693.2	1201.3	1824.2
BC0814	376	36.5	20.7	37.3	22.6	53	92	31.4	27.4	27.2	26.3	57.2
BC0815	35.3	79.8	58.4	52.8	195.5	43.9	74.9	50.2	60.2	28.2	97.6	179.2
BC0816	7.9	44.7	78.5	54.7	17	24.7	122.5	46.9	67.6	58.1	55.4	59.2
BC0817	5.6	20.3	19.4	2.4	7	5.1	7.8	22.5	16.6	4.8	4.2	21.1
BC0818	592.4	373.9	298.5	175	195.7	395.2	558.2	443.3	1466.9	720	1028.1	901.3
BC0819	3520.2	2116.3	2932.5	2068.3	1729.9	5033.1	5085.1	3547.4	3787.7	2839.7	2394	3131.5
BC0820	29.1	14.6	27.7	11.1	14.9	13	12.9	29	20.9	18.1	14.4	26.2
BC0821	9.7	24.2	7.7	72.6	19.3	3.4	57.3	47.4	2.3	3.2	11.2	2.6
BC0822	15.7	5.3	57.2	3.1	0.6	6.8	10.4	36.8	0	0	11	24.8
BC0823	0	3.3	14	18.1	0	0	13.8	10.9	0	0	6.2	41.1
BC0824	61.7	13.4	17.9	14.1	16.4	19.8	16.2	63.1	19.1	37.1	14.4	45.2
BC0825	11.5	18.7	21.9	4.8	7.6	17.4	132.6	21.1	35.1	26.8	51.4	52.1
BC0826	5.1	6.5	3.6	5.1	10.9	2.2	7.1	16.6	6.8	6.6	7.4	2.9
BC0827	14.7	6.4	5	30.8	29.7	7.9	9.8	18.3	5.8	13	6.9	53
BC0828	6.8	15.3	4.4	35.2	22.8	38.6	10.2	29	69.8	5.6	24.8	43.7
BC0829	67.3	40.7	165.2	79.6	0	201.3	30.5	107.5	28.4	24.5	71.6	126.7
BC0830	155.1	100.6	136.8	62.5	29.3	92.3	222.5	194.2	27.1	14.3	118	76.1
BC0831	16.8	7.7	6.3	27.8	0	8.5	24.3	27.8	3.3	56.8	2.9	16.3
BC0832	28.3	18.3	12	14.4	21.5	14.8	11.3	32.1	22	20.7	19.3	14.2
BC0834	208.1	255.6	195.6	197.9	35	546.5	130.7	337.5	260.8	211.7	212.9	187.6
BC0835	78.7	124.3	96	347.4	132.6	121	449	163.3	142.1	278.9	172.8	117.1
BC0836	251.4	290.1	253.1	214.6	255.9	420.3	569.7	524.4	1099.8	955.6	518.7	803.6
BC0838	7	12.2	7.3	4	18.6	14.8	51.1	39.2	16.7	39.3	31.5	19.1
BC0839	261.8	275.1	237.9	244.9	349.4	244.8	63.5	251.8	288.3	374.9	322.7	109.7
BC0840	96.7	179.1	193.6	195.2	145.7	78.7	199	179.6	167.9	252.5	172.6	184.5
BC0842	161.9	262	252.3	540.2	209	340	379.9	220.7	75.3	174.1	113.3	94.2
BC0843	29.2	130.7	150.3	169.8	208.7	192.9	95.9	126.1	52.7	77.4	66.2	134.7
BC0844	0	4.5	0	0	0	5.5	14.8	12.7	4.3	12.9	8.4	37.4
BC0845	10.3	32.7	20.1	21.5	39	29.6	26.9	61.5	84.3	22.1	93.2	98.6
BC0846	8.5	27	19	39.1	7.7	19.9	10.4	34	37	23.5	49.3	21.1
BC0847	9.1	47.3	16.1	27.7	13.8	90.7	177.9	82.1	73.4	30.9	26.4	27.1
BC0848	43.9	135.5	108.7	35.3	48.3	63.5	171.8	80.1	165.6	224.3	69.7	190.1
BC0849	18.9	30.1	25	96.5	25.5	95.6	111.4	178.4	93.4	151.3	135.6	196.6
BC0850	0	32.3	24.5	68.1	82.6	50.2	0	32	161.5	50.3	56.1	53.6
BC0851	0	12	24	6.1	17.3	0	19.2	70.3	110.5	58	123.3	68.6
BC0852	0	3.4	9.8	2	6.7	0	0	28.1	5.3	4.9	6.1	3.4
BC0853	0	4.7	30.9	16.1	6.4	0	17.5	73.7	44.9	17	9.4	43.1
BC0854	35.8	17.5	40	34.8	135.7	4.9	4.8	116.4	38.2	107.5	79.6	63.9
BC0855	14.3	17.2	3.3	4.1	2.1	17.8	12.4	29.4	24.9	4.8	31.8	34.1
BC0856	0	11.3	2.4	10.3	15.1	5.3	8.1	77.6	82.4	0	34.7	12.1
BC0857	66.9	45.3	15.1	36.1	115.9	361.6	20.8	27.1	16.8	9.5	72.2	30.1
BC0858	16.3	41.7	31.6	39.3	7.1	10	243.7	53.5	10.1	15.7	26.2	56.6
BC0859	144.4	110.2	86.6	53.7	129.4	112.2	118.1	133.6	101.8	50.8	104	135.6
BC0860	18.6	24.5	28.2	6.8	55.1	13.2	21.8	37.8	43.9	25.5	39.8	27.3
BC0861	0	38.2	0	79.5	0	55.5	15.8	52.1	8	0	44.6	0
BC0862	19.4	82.2	31	115.5	165.5	50.5	143	225.5	97.2	230.2	303.8	336.2
BC0863	111	73	130.3	203.5	52.1	424.1	338.3	408.5	76	96.6	142.6	133
BC0864	25	38.1	47.6	96.3	19	26.4	32	57	24.8	15.8	16.6	18.6
BC0865	19.6	17.6	9.6	7.7	18.6	16.6	12.6	74	11.1	19.2	11.6	29.7
BC0866	50.7	22.9	26.2	22	61.3	0	132.8	26.8	37.1	30.7	18.4	21.7
BC0867	18	76.7	63.9	97	53.9	30.5	196.4	109.5	144.9	229.7	402.2	356.2
BC0868	90.4	101.3	94.9	136.1	173.3	58.8	82.2	128.6	71.4	29.2	62.8	59.5
BC0869	7686.8	4537.9	6347.4	11057.9	2450.1	12257.3	6186.2	7853.5	14176.2	18296.1	4518.2	13670.8
BC0870	294.2	193.2	198.1	363.8	288.5	261.5	316.7	196.2	185.1	134.9	191.1	205.9
BC0871	197.2	127.7	198.3	247.5	173.7	369.8	256.2	294.2	187.7	199.2	234	309.7
BC0872	990.8	495.9	590.1	317.2	597.3	295.3	581	306.6	1408.8	1345.8	1275.7	1325.8
BC0873	571.3	329.1	349.2	263.4	419.5	324.3	397.8	373.5	749	458.1	497.2	513
BC0874	1281.4	1028.7	814.1	742	979.9	684.7	1110.8	651.1	1506.9	1211.2	1816.5	1183.2
BC0875	756.2	626.6	1230.4	1307.4	22.1	1245.6	1266.5	952	510.6	732.5	876.9	627.5
BC0876	0	3.1	34.4	0	0	8.4	0	17.3	3.3	10.8	5.8	10.6
BC0877	25.3	10	15.1	11.9	26.6	12.7	24.1	33.8	11.7	26.3	17.3	27.9
BC0878	14.3	6.7	7	1.9	4.4	9.1	5.4	14.5	4.7	3.3	15.2	6
BC0879	16.6	42.1	12.4	75	67.3	32.5	14.8	20.3	11.5	25.4	26.6	17.3
BC0880	1317.6	1088.3	2095.1	1336.6	1199.9	2439.6	2495.6	2081.3	2762.4	6274.1	4899.2	3917
BC0881	47.3	17.3	10.9	10.3	27.8	13.6	4.8	23.2	4.9	17.4	6.8	9.2
BC0882	58.8	13.2	8.2	14.9	9.5	5.4	4.5	9.5	7.5	18.5	9.1	10.8
BC0883	12.3	14.7	14.6	7.7	29.9	13.6	8.8	36.9	14.2	5.3	12.1	20.1
BC0884	44.6	15.4	39.6	17.5	6.3	9	11.5	58.2	27	20.8	20.7	30.6
BC0885	194.3	24.4	59.2	28	6.3	15.9	74.4	29.2	33.3	2.7	5.9	63
BC0886	21.7	5.4	46.6	17.7	13.7	2.4	20	23.1	7.4	4	51.7	15.8
BC0887	54.3	22.8	17.4	24.9	41.7	32.8	42.7	41.2	22.5	35.5	27.9	31.4
BC0888	327.6	154.2	149.9	127.2	735.4	107.7	218.9	73.4	55	43.3	128.3	151.8
BC0889	66.4	70.6	115.5	104.5	96.7	176.4	23.3	100.6	162.6	148.2	155.4	141.5
BC0890	790.9	949.5	1104.4	803.4	1073.9	2229.1	1680	1754	1623.6	1173.1	948.3	1779.7
BC0891	0	38.3	0	0	0	51.9	0	31.1	8.5	8.6	3.9	0
BC0892	0	141	172.2	194	86.8	97	109.7	77.8	99.7	22.8	103.7	253
BC0893	55.2	63.8	33.7	60.6	117.7	198.2	60.2	60.3	30.7	56.5	26	45.1
BC0894	23.6	54.5	71.8	56.6	30.7	21.2	5.3	47.6	29.8	22.5	82.5	33.3
BC0895	29.5	30.5	20.4	19.8	49.3	31.8	13.9	32.8	27.8	41.5	27.9	55.8
BC0896	105	15.8	4.1	4.8	6.3	20.9	14.9	22.6	8.5	9.3	10.6	10.6
BC0897	30.7	69.6	80.6	80.1	18.1	113.3	55.7	76	84.3	73.1	84.3	101.6
BC0898	4877.5	6082.6	8406	7800.2	4467	13196.9	11229.1	11652.2	2381.6	1755.8	1271.9	2014
BC0899	192.4	282.6	388.1	450.7	371.2	293.2	57.8	586.5	168.8	181.7	175.6	43.2
BC0900	101.6	43.1	44.2	9.1	75.9	11.6	120	190.8	190.6	21.2	84	85.7
BC0901	195.2	221.5	330.9	283.8	307.6	290.5	58.7	249.6	248	295.6	348.4	260.5
BC0902	53.3	22.4	43.5	30.1	42.6	72.9	14.6	44.3	43.4	15.5	17	48.4
BC0903	72	75.7	65.2	106.8	72.6	75.2	28.7	34.7	125.1	64.6	159	97.7
BC0904	21	4.1	0	0	12.4	7.6	0	9.7	11.5	44.3	2.7	3.8
BC0905	4466.2	2492.5	3217.9	2147.1	3774.8	4606.2	7388.7	3436.3	13589.8	9939.3	14995.6	15773.5
BC0906	8529.8	6432.4	8920.1	6815.5	5900.5	17266.5	20268.2	12185.1	15685	13401	17350.9	21796.7
BC0907	517.4	150.2	149.8	94.1	105.4	114.1	209.8	148.5	414	420.2	372.2	313.3
BC0908	37	34.5	5.6	18.1	5.9	2	9.2	38.7	100.7	50.9	28.8	56.1
BC0909	221.6	49.3	48.4	50.4	37	456.7	10.3	44.7	107.2	51.3	134	144.5
BC0910	228	171.3	216.4	129.3	201.8	152	411.8	257.4	167.9	104.3	254.5	167.1
BC0911	570.6	449.7	618.3	361.4	387.6	461.6	581.6	311.7	289.8	211.1	286.7	450.1
BC0912	20.6	12.3	3.9	2.6	6.3	3.1	4.4	24.5	23.8	8.2	4	7.7
BC0913	5	13	20.7	3.2	9.8	7.4	14	18.2	33.7	35	49.9	31.5
BC0914	23.7	49.6	19	52.9	85.7	66.7	13.5	32.6	32.9	40.9	23.8	22.4
BC0915	8.5	9	18	20.7	7.1	36.9	23.6	38.1	42.4	16.7	36.6	27
BC0916	200.2	670	949.9	1247	43.7	832.6	524.4	1019.3	516.2	454.5	332.9	548.2
BC0917	0	25.2	0	0	0	24.8	0	12.4	23.5	12.2	13.8	0
BC0918	11220.2	10258.8	11649.4	11766.6	3456.1	10739.2	14833.3	10287.8	9089	14478	9018.9	7801.7
BC0919	13.6	66.7	47.5	57.6	64	41.6	10.7	14.8	70.8	105.7	89.7	169.4
BC0920	221.9	107.3	61.4	100.7	124.1	134.1	7.4	45.5	189.5	123.5	102.9	52.3
BC0921	133.6	154.8	59.6	89.5	0	90.4	145.4	44.3	110.7	148.7	59.5	7.2
BC0922	0	7.4	5.9	51.9	0	6.8	0	12.6	3.1	0	8.1	10.8
BC0923	0	7.9	6.7	0	0	0	0	9.1	0	0	0	11.4
BC0924	0	54.6	15.4	0	0	0	0	19.3	0	0	13.9	48.8
BC0925	0	45.4	0	0	0	11.5	43.8	6.5	4.8	0	4	20.9
BC0926	0	2.7	9.3	6.7	0	0	0	31.3	47.2	0	0	0
BC0927	56.8	28.5	23.5	14.3	16.3	32.6	12.1	58.1	16.5	7.4	12.7	25.5
BC0928	20.9	16.4	20.9	0	75.3	0	0	5.1	40.7	48.5	43.4	95.2
BC0929	30.7	49.1	12.1	33.1	9.5	43.9	14	35.9	27.4	10.1	7.4	92.9
BC0930	0	46.2	7.3	15.3	13.5	24.5	84	25.4	3.7	20.6	13.2	24.1
BC0931	8.9	27.6	5	30.5	63.1	100.7	79.8	41.3	23	7.5	37.8	46
BC0932	0	22.3	47.6	129.4	56.6	0	33.5	6.6	58.9	11.8	20	50.9
BC0933	434.5	52.5	38.2	26.8	7.1	92.8	12.1	50.6	52.3	82.6	76.4	55
BC0934	9.1	18.7	11.9	3.9	41.9	4.9	0	24.6	5.3	3.7	6.7	21.8
BC0935	1453.8	1091.9	1303.5	1175.5	449.9	686.8	1119.2	731.5	1735.3	796.5	672.9	1086.7
BC0936	54.6	25.8	24.6	16.2	75.2	14.9	6.5	53.9	49.5	29.1	47.8	27
BC0937	60.6	43.7	20.3	21.4	39.8	10.1	0	34.8	39.3	13.5	37.8	24.2
BC0938	281.8	29.1	50.5	6.3	17.1	23.8	90.2	55.2	60	44.4	58.7	50.1
BC0939	161.9	94.2	57.7	47.5	190	133.9	61.5	77.3	64.7	41.8	79	61.4
BC0940	85.1	113.7	124	74.7	104.5	91.2	409.4	89.3	90.8	53	76.3	58.7
BC0941	372.2	327.9	290.5	418.1	407.8	239.5	474.1	213.9	274.3	481.9	478.3	272.5
BC0942	130.6	67	30.7	23.7	245.6	18.5	100.3	20.8	97.5	120.9	109.6	84.2
BC0943	65.6	131	111.6	86.1	109.6	18.5	0	46.6	52.8	26.6	163.1	47.4
BC0944	358.4	164.7	132	165.5	259.9	186.3	166.2	178.5	341.1	590.2	370.5	336.8
BC0945	142.3	212.1	194.2	152.8	250.7	190.8	146.2	154	165.1	181	117.4	237.5
BC0946	22.4	12.9	18.4	4.8	101.8	18	15.2	50.1	40	8.1	9.7	26.5
BC0947	10.6	22.7	12.7	28.6	46.7	11.3	21.6	30.3	22.2	25.8	22.2	35.9
BC0948	12.8	30.2	21.5	8.6	89.7	13.6	19.5	39.8	24.6	25.9	62.8	27
BC0949	47.2	35.7	24.2	15.5	122.9	55.6	14.3	37.7	21.7	20.3	38.5	34.3
BC0950	119.2	31.4	96.5	53.9	176.9	77.6	118.4	113.5	80.4	70.1	37.2	49.1
BC0951	0	25.5	17.3	14.7	0	6.1	33.2	22.6	15.6	25	24	51.6
BC0952	16.2	35.9	185.1	205.3	0	0	285.7	53.3	88.9	117.3	115.9	77.3
BC0953	52.8	95.9	118.3	82.9	127.7	161	122.7	139.8	119.2	137.5	112.8	226.5
BC0954	132.6	133.4	185.3	160.3	208.5	390.4	373.9	79.7	114	131.8	83	124.3
BC0955	0	25	40.5	14.8	24.4	18.8	9.6	37.8	9.4	6.2	8.7	19
BC0956	20.5	13.4	8	32.1	19.9	7.2	7.3	25.3	11.5	8.7	11.6	17.9
BC0957	768.3	92.6	240.1	209.8	317	59.4	67	119	50.4	156.2	84.3	77.3
BC0958	16.9	75	56.6	69.7	36.1	11.3	48.4	78	55.2	50.3	22.4	54
BC0959	38.6	21.3	13.7	32.4	4.9	103.7	7.2	19.7	27.1	6.8	7.2	10.9
BC0960	3090.6	5024.1	9564.1	10502.1	5773	19190.4	20705.8	12656.3	11761.2	13427.8	6877.9	15935.8
BC0961	10.8	70.5	56.3	116.1	80.9	101	0	47.5	34.3	99.2	22	25.9
BC0962	22.9	16.8	21.1	10.3	6.3	14.5	17.6	275.9	23.2	62	41.4	47.5
BC0963	440	261.8	488	248.6	205	481.8	643.5	746.2	451.3	466.5	585.3	448.9
BC0964	16.4	3.9	0	3.6	3.7	13.4	11.8	15.3	4.1	3.1	5	13.2
BC0965	766.5	78	87.2	92.7	192	121.5	43.8	99.3	56.3	40.1	14.5	54.6
BC0966	42.7	33.5	27.4	15	39.6	33.2	29.8	45.6	32.6	18.3	36.7	55.4
BC0967	14.3	25.6	13.7	11.7	4.8	15.4	0	39.7	8.9	34.6	24.4	5.8
BC0968	18.5	84.4	56.4	42.5	49.6	57.8	68.3	69	54.9	20.5	42.7	34.7
BC0969	0	63.1	37.8	85.6	21.3	23.9	65.7	155.2	0	90.7	41.8	37.2
BC0970	0	14.2	102.6	80.8	12.3	11.8	70.3	81.8	0	0	23.4	35.5
BC0971	83.4	41.9	50.6	69.9	78.8	49.3	104.7	42.6	78.8	74.3	84.8	66.8
BC0972	240.1	333.5	355.5	352.1	355.6	317.3	571.7	526.1	461.2	609.3	314.3	422.4
BC0973	16.2	13.6	9	31.8	18.5	18.8	9.9	20.2	24	37.4	2.6	4.4
BC0974	68.5	120.2	194.5	137.1	7	228.6	95.6	313.1	125.2	196.1	231.8	262.2
BC0975	29.3	56.6	164.5	21.5	32.1	3.9	62.6	35.3	12.5	0	17.7	36.8
BC0976	565.9	115	102.4	138	51.5	206.5	218.3	85.5	82.9	86.9	55.3	168.8
BC0977	17.6	140.5	106.5	115.2	151.9	58	79.1	99.3	110.1	67.1	17.1	105
BC0978	6.5	37	60	22.3	8.8	7.7	0	46.3	4.5	8	12.5	21
BC0979	33.2	125.3	54.5	130.2	209.8	155.6	130.2	145.6	24.7	100	19.9	42.8
BC0980	0	129.9	66.9	129.5	193.6	1812.2	104.6	264.4	10.3	46	24.3	13.8
BC0981	616.8	1072.7	1409.4	1756.6	1194.5	2539.1	3200.9	1553.2	1664.3	2139.9	2488.6	3290.1
BC0982	94.5	537.8	604.5	790.8	461.7	1176.6	373.2	734	162.6	274.8	63.3	107.6
BC0983	0	54	11.6	2.1	38	27.1	28.7	17.6	4.2	53.6	20.9	0
BC0984	1448.9	990.7	1653.6	1281.3	740.2	2084.6	1684.7	1584.5	923.5	2808.9	1915.9	2023.2
BC0985	0	61.6	5.4	81.5	25.2	40.2	0	36.7	28	48.2	13.8	7.5
BC0986	135.2	187.3	160.6	143	235.1	160.4	106.4	143.9	248.8	302.9	259.2	118.1
BC0987	10.6	148	0	4.4	201.4	804.2	29.5	72.7	274.3	687.4	10.7	15.3
BC0988	4.6	11.5	3.7	4.8	2.3	3	12.9	24.5	4	4.1	3.1	15.7
BC0989	263.1	225.8	366.4	210.7	95.2	907.9	820	505	456.2	630	227.8	1073.3
BC0990	27.2	15.5	15	10.4	36.7	0	0	67	9.8	21.4	21.3	46.2
BC0991	2.4	20.4	8.9	10.7	36.9	13.2	12.9	28.5	10	6.2	4.7	15.4
BC0992	81.2	103.5	132.3	66.2	77.4	163.2	88	48.5	56.8	74.9	46.9	60.4
BC0993	15.5	52	117.3	74.4	90	40.2	0	103.4	69.7	34.3	90.4	46.6
BC0994	30.5	75.1	83.5	104.3	157.3	45.7	533.7	140.2	128.9	93.1	64.3	76.1
BC0995	39.8	54.5	63.2	47.9	97.1	108.4	204.3	93.7	40.1	12.2	0.5	26.1
BC0996	698.6	367.2	211.9	415.4	183.4	283.7	163.2	169.8	421.4	170.8	78.5	198.1
BC0997	282.3	379.7	429.1	327.3	319.4	1513.4	1192.7	955.8	306.9	448.4	362.3	726.9
BC0998	307.1	480.2	325.2	510.5	924.4	1711.4	1086.2	569.2	557.9	875.9	855.7	542.8
BC0999	242.1	419.2	494.4	497.5	334.5	686.5	1131	496.1	512.5	533.5	670.8	443.5
BC1000	0	215.6	178.2	409	881	318.4	222.6	310	261.6	198.8	199.8	248
BC1001	0	78.4	84.1	110.3	9.3	462.9	29.7	126.3	42.4	25.3	68.8	14.1
BC1002	45.8	104.9	118.6	199.3	93.9	239.3	261.1	487.8	280.7	424.1	196.1	133.4
BC1003	46.4	182.3	263.9	304.7	215	522.1	214.6	647.5	169.3	333	230.6	174.7
BC1004	224.3	391.7	404.3	477.2	337.7	946.6	623.6	751.8	311.4	647.8	457.9	401.5
BC1005	1245.4	971.5	1065	1740	1647.4	6754.1	4368.9	3334.5	503.3	1056.8	886.1	1640.6
BC1006	44.4	89.5	190	127.5	139.2	496.7	123.9	208.6	96.9	126.2	89.9	54.8
BC1007	58.7	85.9	90.4	115	119.6	346.1	56.3	97.6	85.2	102.1	47	104.2
BC1008	69.5	108.3	41.5	75	152	126.5	57.3	70.9	100.6	60.6	72.2	45.4
BC1009	6.8	41.2	38.2	25.8	70.8	11.2	120.4	97.8	34.1	27.4	43.4	19.8
BC1010	0	306.5	233.5	272.9	432.7	890.6	623.4	740.6	30.5	71.7	161.2	112.9
BC1011	143.2	216.9	218.5	300	284.6	571.7	148.4	591.2	6.5	159.6	53.4	40.9
BC1012	1368.3	2214.9	2481	4155.6	2921.5	4978.5	1602.4	2481.8	216.9	334.2	235.4	432.2
BC1013	135.3	44.2	83.5	39.8	69	17	10.5	97.9	116.3	78.9	48.5	100.2
BC1014	28.5	70.4	68.9	61.6	82.6	30.1	31.5	71.6	94.8	79.4	38.7	74.2
BC1015	1101.4	1129.5	1212.2	1077.9	1010.6	1456.6	2004.2	1455.8	2613.1	1967.4	2095.3	2418.5
BC1016	18781.7	27677.7	31875.1	32562.8	22958.2	50837.2	56570.5	45438.8	25170.6	29467.9	16887.1	27794.8
BC1017	11437.4	20861.3	28076.9	32403.4	18343.4	48903.7	59313.4	35346.8	27186.6	31632.8	16204.1	27030.2
BC1018	42670	35357.4	39383.7	35115.7	41673.4	54538.5	57831.1	67218.7	29425.9	29520.5	22938.8	24698.6
BC1019	87	125.6	147.3	173.6	161.4	367.5	322.8	193	187.4	142.6	286.6	225.7
BC1020	215.6	138.4	124.2	112.4	182.8	320.5	163.9	83.7	243.9	233.4	256.6	304.5
BC1021	1855.6	2463	2076.2	2296.6	1614.2	2793	923.8	931.8	1212.3	1530.5	1234.1	858.4
BC1022	628	676	679.5	1019.2	383.2	1251.2	418.3	456.8	747.5	790.3	621.1	777.6
BC1023	113.9	148.6	112.5	189.9	173.3	108.7	227.7	122.3	64.7	112.5	123.1	70.9
BC1024	295.4	313.9	377.8	314.1	241.8	278.2	98.5	177	67.1	5.4	13.3	32
BC1025	138	153.8	121.9	311.4	244.9	333.2	142.9	211	52	35.9	45.4	29.3
BC1026	111.6	214.5	144.9	181.8	106.9	285.5	597.9	237	146.8	346.9	371.6	321.5
BC1027	10.7	18.4	62.5	19.4	13.4	10.3	33.4	26.7	17.5	4.5	30.1	22
BC1028	82.4	100.7	135.7	61.6	78	17.8	68.6	155.7	36	46.3	290.2	65.1
BC1029	47.4	15.7	18	3.1	19	101.9	17	38.6	21.8	2	23	51.8
BC1030	122.9	110.5	45.5	153.4	152.2	54.8	140	97	27	29.5	41.6	57.3
BC1031	38.1	17.3	21.1	34.3	20.6	38.4	34.2	152.9	18.5	29.7	30.5	58
BC1032	9.2	13.1	14.8	22.8	9	13.6	6.1	27.2	9.3	3.8	4.5	14.5
BC1033	104	370.3	349	365.4	312.7	386.3	68.8	204.8	302.4	286.5	427.2	221
BC1034	472.9	649.9	697.9	1154	469.7	731.3	867	728.1	862.4	326	464.5	618.3
BC1036	1652	1323.9	1710.4	1664.3	606.5	2789.6	1673.9	1880.4	99.1	105.8	106.1	156.6
BC1037	27.2	82.4	55	34.6	56.3	0	22.2	113.7	21	33.8	93.3	36.3
BC1038	55.1	90.9	69.5	55.9	18.6	54.2	21.9	77.7	63.1	3.6	58.3	95.9
BC1039	61457.7	49764	63241.6	75820.5	39007.5	165275	149732	165640	89922.9	120092	68459.1	126532
BC1040	45.3	97	58.7	149.4	35.8	90.8	249	53.4	133	295	177.2	172.4
BC1041	23.7	24.8	32.1	46.5	54.5	63.4	62.5	63.7	78.7	27.8	83	140.6
BC1042	0	10.7	3.3	17	0	17.5	0	26.4	0	0	0	4.8
BC1044	124.8	45	163.6	115	38.6	16.1	12.9	178.6	23.2	56.3	3.7	0
BC1045	1107.9	784	842.1	1081	31.8	772.5	1592.5	1088.1	635.1	679.5	771.2	348
BC1046	681	471.4	671.2	557.5	400.1	566.2	194.3	638	736.8	900.4	633	916.2
BC1047	2148.6	2278	1898.6	2536.4	4114	2305.4	2728.7	2330.2	5051.5	3657.2	4504.6	2785.1
BC1048	1454.8	1220.3	1532	1396.1	1304.7	1753.5	1481.3	1317.3	1924.9	2510.4	1340.9	1736.9
BC1049	1081.4	357.1	602.8	476.4	335.1	360.7	767.8	677.1	1115.7	830.1	826.3	403.3
BC1050	153.1	236.5	355.7	379.6	196.6	307.1	166.8	197.9	297.6	129.9	153.2	144.9
BC1051	170	146.2	221.4	215.3	142.2	196.6	144.9	119.6	117.3	130.2	102.7	161.4
BC1052	55.6	226.5	241.4	407.4	112.1	354.1	395.4	213.5	437.1	469.7	606.1	351.4
BC1053	14.2	114.7	37	56.9	24	103.1	47.4	82.5	138.4	157.8	83.5	115.3
BC1054	0	136.1	16.7	88.3	148.6	772.6	13.1	94	82.8	19.5	63.5	37.7
BC1055	10.4	211.7	235.9	152.2	285.8	261.9	36.6	257.3	387.7	288.6	287.3	103.7
BC1056	127.9	136.6	225.4	170.4	162.2	447.4	279.9	261.6	615.3	420.5	468.6	669.2
BC1057	10.1	48.1	78.9	18.8	60.8	13.1	0	25.3	34	18.1	36.9	57.4
BC1058	19.4	63.3	116.2	126.1	15.1	55.8	119.7	45.2	186.8	124.2	66	184.3
BC1059	8.4	16.1	14.4	62.2	10.7	7.5	80	107.5	22.1	24.4	16.5	82.9
BC1060	20.1	17.8	28.4	26.7	45	23	125	55	35.4	85.2	57.1	63.1
BC1061	0	53.9	20.8	31.3	26.6	18.4	25.3	50.5	34	33.2	80.9	22.7
BC1062	40.4	73.9	131.2	65.2	43.2	99	70	101.6	192.8	60.1	187.8	153.6
BC1063	7.7	36	22.5	17.5	56.7	28.9	14.9	55.5	21.3	29.8	14.8	40.7
BC1064	256.1	130.7	210.9	87.8	60.5	47.7	156.1	160.2	119.6	62.7	67.8	111.4
BC1065	56.8	100.5	121.3	89	109.2	85	16.4	82.3	53.7	150.4	52.3	91.6
BC1066	870.4	859.8	1026.3	985.9	968.6	1620.4	1542.1	1390.5	1629.1	1860.9	1496.1	2077.1
BC1067	23	11.8	9.7	10.4	12.8	7.2	11.7	16.3	13.3	7.9	12.3	29.6
BC1070	1361.8	927.9	1053.4	1163.6	894.6	1248.4	2172	1416.2	1339.6	1307	1506.5	1719.9
BC1071	271.7	258.9	276.3	286.6	259.4	483.9	639.6	323	374.2	355	354.4	345.8
BC1072	710	479.4	344.7	427.9	569.4	766.8	345.2	230.8	268	244.9	247.3	260.4
BC1073	31.1	114.9	50.2	23	0	24.3	416.8	138.4	367	435.5	396.5	183.9
BC1074	156.2	108.9	133.7	145.7	106.4	165.4	116.3	161	131.6	142.9	52.5	107.9
BC1075	48.1	14.8	41.1	16.5	93.1	60.4	14.3	62.3	139.2	40	49.5	63.4
BC1076	19.1	28.2	36.3	13	27.5	40.8	27.9	40.6	21.8	47.7	32.3	37.2
BC1077	1018.5	68.1	27.1	128.5	36.6	59	28.5	35.9	95.9	69.7	84.2	49.9
BC1078	9.8	17.4	20.2	19.2	6.5	10.5	10.8	32.9	28.6	18.5	34.2	41
BC1079	144.2	164.6	71.8	136.9	71.4	367.6	85.3	113.7	171.6	228.5	243.5	166.4
BC1080	1056.7	270.3	290.9	119.1	142.3	189.7	501.6	252.3	345.3	692	372.6	661.8
BC1081	346.1	98.8	100.5	68.8	194.7	67.3	327.3	91.8	242	271.4	216.1	157.8
BC1082	19.6	184.9	237	140.8	104.1	171.6	161.8	191.2	249.5	119.8	199.5	177.3
BC1083	6531.1	10916.8	13875.6	15373.1	8330.4	15276.5	13640.8	10383.2	9752.5	10406	9149.4	10224.8
BC1084	326.4	222.6	366.8	288.1	964	4601.8	9732.6	6892.6	11223.8	19910.6	20366.1	33887
BC1085	350.3	191.4	351.7	284.8	563.6	216.1	157	212.6	412.3	243.2	352.9	263.3
BC1086	143.3	312.5	302.2	414.4	510.6	410.8	292.6	264.7	491.2	380.8	371.4	368.2
BC1087	75.9	71.8	67.6	48.8	17.6	99.6	47	82.9	30.7	281.9	118	70.5
BC1088	891.7	835.4	937.9	1387.6	511.5	1023.7	1398.5	817	646.4	430.9	586.9	842.1
BC1089	13.7	48.8	18.9	28	23.3	33.2	22.5	72	32.3	20.7	62.4	37
BC1092	2127.4	1185.7	1114.3	833.4	1249	1367.2	2168.7	975.1	3488.4	2130.1	1407.7	3020.4
BC1093	1975.8	1536.9	1463.5	1176.3	1267.6	2154.8	2811.4	1594.6	2619.9	1465.4	1449	2233.9
BC1094	4742.6	2774.8	2861.8	2138.3	2028.6	3412.8	4897.7	3498.6	3075.6	1720.4	1759.1	2897
BC1095	0	9.2	17.2	3.6	9.5	0	9.8	27.1	32.5	13.7	9.6	12.6
BC1096	0	4.8	6.3	0	0	7.9	0	17.1	0	6.9	11.6	4.8
BC1097	121.3	14.1	3.7	3.8	0	9.5	0	9.2	7.7	41.2	12.2	5.8
BC1098	112.9	69.1	37.7	10.7	74.4	63.3	35	55.7	23.8	21.2	32.3	38.4
BC1099	20	11.1	14.4	17.2	7.6	7	0	0	3.9	0	9.6	6.9
BC1100	36.9	9.4	1.8	8.7	38.5	4.7	0	17.7	13	47	20.1	8.6
BC1101	5.7	25.8	15.7	28.1	16.9	27.1	4.1	26.3	14.1	23.9	20.1	14.8
BC1102	36.5	21.1	55.6	53.7	159.5	0	22.5	46.3	3.5	26.6	19.7	13.8
BC1103	11.1	29.9	44.3	48.2	35.5	59.2	28.4	25.4	8.9	28.1	76.4	27.3
BC1104	50.6	13.6	45.5	33.7	103.5	60.5	6.5	33.9	20.6	15	56	8.3
BC1105	45.6	14.1	35.3	33.4	54.7	0	31.1	35.3	16.6	106	69.3	83.5
BC1106	8.9	41.3	6.2	21.5	27.7	3.8	6.9	30.5	9.5	77.4	39.8	97.6
BC1107	16.7	41.9	37.9	18.6	59.8	0	60.1	41	58.9	144.4	91.3	92
BC1108	13.8	36.5	9.7	17.6	34.2	12.3	14.7	36.7	77	38.5	103.5	155.7
BC1109	0	9.8	4.6	3.4	10.3	6.4	4	22.2	13.4	13.3	8.3	10.2
BC1110	23.2	12	10.1	111.8	45.5	9.3	11.1	42.8	6.1	7.8	10.5	10.2
BC1111	34.6	70.8	59.9	30.4	32.1	75.8	95.1	42.9	73.6	43.6	90.7	61.8
BC1112	4.2	17.6	9.7	7.1	12.4	2	2.8	24.2	36.2	65.6	74.9	20.1
BC1113	54.6	55.4	29.5	25.2	134.1	52.1	67.4	76.9	46.1	62.6	150.2	157.9
BC1114	100.8	160	156.6	244.5	111.8	589	371.3	398.1	409.3	734	288.6	1333.4
BC1115	374.9	449.9	65.6	54.7	241.9	792.7	48.1	97.7	573	446	114.4	64.2
BC1116	11	97.9	6.5	4.2	72.7	40.5	7.9	19	194.4	391.1	1.6	12.9
BC1117	10078.3	13612.5	14.1	11.2	15337.7	52487.4	22.5	41.4	40473.7	45489.9	18.6	10.2
BC1118	46.7	85.6	83	89.6	100.1	61.5	331.5	110.5	124.7	161.7	99.9	160.9
BC1119	20.6	84.9	173.8	87.9	193.6	105.6	119.3	64.5	156.6	194.5	212.4	115.1
BC1120	136.8	296.5	240.4	249.7	61.2	324.3	104.3	180.1	130.4	405	201.7	171.1
BC1121	210.5	288	245.8	132.5	338.1	222.2	108	119.2	204.6	216.5	115.1	59.5
BC1122	79.4	87.8	104	180.2	71.4	129	207.6	88.3	21.4	73.4	14.3	48.8
BC1123	80.8	70.9	115.1	23.6	72.8	54.1	57.2	80.5	61.2	158.7	106	81.9
BC1124	21	13.6	26.3	31.3	19.3	37.6	13.8	59	56.7	20.5	62.9	57.5
BC1125	2799.1	4311.8	5416	4425.2	2949.1	10493	12985.5	6771.5	4666.8	9481.2	9050	10552.6
BC1126	7.3	35.8	11	16.9	95.1	83.6	9	48.3	10.4	29	76.9	10.4
BC1127	52.3	69.8	121.8	84.9	277.9	589.3	1049.9	741.5	1494	1467.3	3012.4	3406.8
BC1128	143.1	53.6	137.7	163.4	588.3	1591.4	3409.6	1920.6	2269.4	2066.7	3954.6	4373.6
BC1129	21.4	87	78	98.5	65.9	23.5	36.3	41	63.4	161.9	118.1	62.5
BC1130	38.3	88.5	94.8	52.7	51.1	75.5	33.4	71.8	81.5	39.1	30.2	74.8
BC1131	3982.4	9392.4	9061.5	12916.2	9864.8	16040.6	8859.8	11651.7	9006.3	11496.3	5390	6290.4
BC1132	0	11.2	3.6	4.4	62.4	0	13.5	26.5	30.9	0	15	5.7
BC1133	1230.2	493	792.7	830.9	212.8	1007.6	484.4	795.6	490.8	820.1	561.8	796.3
BC1134	7.1	41.7	57.3	95.7	65.6	72.6	14.2	118	40.4	113	56.5	43.6
BC1135	169.7	466.6	409.4	259.4	411.4	1097.6	1766.9	928.6	1441.7	2152.6	1908.8	2278.5
BC1136	313.9	788	1365.4	1057.7	822.5	1250.2	3901.9	1389.8	2168.4	4963.8	4465.3	4393.7
BC1137	46	73.5	63.4	45	105.9	68.2	132.6	118.5	60.7	121	226.5	229.7
BC1138	119.3	119.5	147.5	266.5	90.3	363.8	299	260.6	156.7	180.3	284.5	356.7
BC1139	0	62.3	83.7	57	0	200.5	53.5	83.2	47	60.8	213	188.5
BC1140	163.2	26	81.1	29.3	0	28.2	0	151.3	40.2	68	237.9	78.3
BC1141	0	33.1	39.2	11.5	115.9	135	258.1	71.3	41.5	14.3	54.6	87.7
BC1142	0	26.6	26.3	28.4	31.8	9.2	14.1	46.7	54.8	70.9	35.7	122.7
BC1143	46	48.5	63.7	12	53	15	68.4	33.1	35.9	10.8	120.1	59.1
BC1144	0	36	127.8	18.5	0	11.5	0	37.9	7.5	22.5	43.6	12.3
BC1145	0	16.2	96.4	0	9.8	10.7	77.7	23.9	44.8	39.4	24.9	79.6
BC1146	203.2	887.8	1677.2	795.1	363.1	735.2	4774.7	1979.8	4215.5	3753.3	3691.7	2853.7
BC1147	528.5	466.1	449.7	263.5	463.2	361.9	739.1	294.7	623	799.4	1088.7	810.1
BC1148	2495.4	6489	9946.2	10420.7	4190.8	11867.2	14559.5	6636.3	9430.6	7541.4	4500.9	7999
BC1150	157.5	522.9	561.4	362.2	387.7	748.7	776.9	494.7	556.2	479.2	766.5	535.7
BC1151	8.1	27.2	9.9	15.7	24.9	132.8	6.2	31.9	22.2	13.5	14.4	24.5
BC1154	154.9	14.1	7.7	22.7	34.4	4	21.8	23.8	4.9	12.1	9.2	23.9
BC1155	75.5	69.5	113	66	225.8	171.3	145.4	105.1	126.5	47.9	120.6	167.7
BC1156	44.8	89	139.6	94.4	94.8	191.2	239.6	162.4	266	191.9	103	372.5
BC1157	26.6	230.4	235.2	231.9	242.2	331.9	306.3	190.1	266.7	174.1	145.6	262.9
BC1158	123.9	136.5	117.7	112.6	113	133.1	102.8	105.1	157.5	166.9	109	53.9
BC1159	1771.2	946.8	820.1	823.9	657	411.5	692.4	439.8	1023.7	1041.6	877.1	791.8
BC1160	127.2	155.1	162.5	200.4	173.5	105.4	78	224.3	140	150.4	189.4	97.3
BC1162	0	16	34.6	22.8	0	14.7	0	28.1	37.4	0	5.1	10.4
BC1163	25	16.1	51.2	33.5	4.4	5.4	12	32.7	25.5	18.6	20.7	30.4
BC1164	491.5	448.8	830.6	722.4	430.5	1160.8	2487.8	1148.8	1573.7	2202	1257.7	3272.3
BC1165	227.1	180.4	335.1	123.2	193.2	796.6	166.6	270.2	648.5	471	698.1	893
BC1166	33.2	13.9	0	2	0	14.3	0	35	79.7	0	85.5	125.1
BC1167	3143.1	3365.1	4599.7	4682.7	2139.3	5999.8	5865.2	4510.9	128.8	597.8	155.3	356.4
BC1168	326.7	245.9	261.7	244.9	217.5	431.4	456.9	320	272.9	259.6	284.3	361.3
BC1169	9408.6	2906.4	5067.5	5499.6	1093.6	3273.2	2480.7	2436	6126	7122.1	5081.3	3805.2
BC1170	30.1	45.3	36.8	20	8.2	42.7	34.1	63.5	20.1	16.1	35.7	31.2
BC1171	10.3	10.2	17.7	6.7	5.5	35	28.7	40.1	11.8	5.5	13.7	11.4
BC1172	117	74.7	140.5	58	142.1	0	275.3	62.9	98.3	91.7	127.3	124.7
BC1173	1216.2	1127.4	1374.7	2314.7	1084.3	1534.2	1003	2192.7	458.6	708.2	1085.1	1023.8
BC1174	1771	1650.2	2037	3294.1	833.3	1882.6	2176.7	1075.9	1552.6	1471.4	4881.5	3327.8
BC1175	5.2	21.2	10.6	14.1	7.3	2.3	17.2	24.2	26.6	5.4	24.5	27.7
BC1176	0	41.4	38.2	125.7	79.6	41.6	36	193.6	65.8	97.7	72.5	71.2
BC1177	686.4	241.5	244.4	265.3	350.1	379.7	701.4	173.3	1676.7	497.9	637.3	918.6
BC1178	293.5	48.5	91.3	80.7	35	55.1	65.8	87	47.4	107.4	16.8	106.6
BC1179	1453.6	850.3	617.4	681	1181.7	243.1	92.6	172.1	227.4	109.1	106.3	85.3
BC1180	2889.9	1960.6	1942.9	2459.9	1304.4	1115.2	1184.1	543.9	1157.8	537.7	499.2	635.9
BC1181	2800.3	1930	1714.3	1376.5	1314.4	1557.2	1436.4	927.6	765.8	450.8	356	512
BC1182	6358.2	4049.6	3988.1	3210.5	2498.6	3542.3	3339.8	2107.8	1370.7	603.9	627.5	979.2
BC1183	9592.4	6072.4	5656.4	5474.5	4628.3	8556.9	2394.6	3786.6	1858.4	1156.1	861	1311
BC1184	11.7	60.5	51.1	56.5	35	63.2	108.1	77.1	50	8.4	53.8	63.7
BC1185	136	94.9	59.1	140.5	57.9	38.1	44.2	53.6	27.4	10.9	41.7	65.2
BC1186	5631.8	3553.2	5489.6	5558.5	1481.8	12689.1	11549.4	8895.3	8060.8	11079.2	7623.5	9366
BC1187	7	1535.7	1912.7	2678.5	1030.8	1815.6	2486.3	2027.7	766.1	1181.6	619.1	203.2
BC1189	1	51.8	31.3	26.5	9	9.3	26.6	26	6.5	5	26	5.4
BC1190	2154.4	890.9	1031.6	1355.8	797.6	701.4	1712.2	937.9	1113.6	1514.6	910.2	699.7
BC1192	34.4	80	90.6	28.1	75.6	74.8	51.1	91.8	59.8	75.3	48.6	72.5
BC1193	1451.7	1683.7	1996.1	1512.6	1324.8	1958.3	3573.5	1527.6	3877.6	8437.3	9158.5	7336.8
BC1194	4.6	65.5	39.2	34.1	27.3	113.1	6.7	29	117	67.2	73.7	83.8
BC1195	148.8	72.1	49.2	24.9	123	82.8	33.4	94.7	60.4	15.2	31.6	35.5
BC1196	34	21.4	38.8	11.6	32.7	29.3	4.8	40.4	28.2	88.9	50.5	10.6
BC1197	251.4	447.2	323.2	452.4	274.2	309.3	110	269.2	328.2	296.6	265.5	282.7
BC1198	253.4	557.9	531.3	823.2	1127.1	548.5	503.9	395.5	502	476.8	707.6	631.9
BC1200	817	333.8	378.5	475	768.7	87.9	304.7	618.7	400.1	570.2	511.6	595.8
BC1201	41.8	36.9	72.7	64.9	38.6	36.7	113.3	87.4	21.1	32.3	60.8	27.8
BC1202	36.8	24.9	71.7	21.4	81.5	10.4	25.4	66.7	83	32.4	17.2	29.9
BC1203	18.1	10.5	8.9	7.3	24.6	3.1	84.3	26	21.5	17.9	15.6	12.2
BC1204	13.8	12.2	14	7.1	22.3	8	17.6	13.1	32	57.5	27.4	42.8
BC1205	17	20.2	5.1	8.1	33.6	9.7	39.7	43.5	36.9	36.7	46.9	50.3
BC1206	10.6	12	25.9	17.2	18	16.4	0	18.4	13	12.8	13.4	24
BC1207	37.5	190.9	331.1	383.1	67.4	403.1	626	398.9	81.3	69.6	299.6	116.6
BC1208	13.8	16.4	10.2	27.2	12.4	101.1	12.9	34.9	36.5	13.7	42.7	28.9
BC1209	13.5	14.8	30.2	16.7	8.3	27	69.6	28.5	62	9	57.7	23.8
BC1210	0	25.5	9.1	22.7	2.7	37.5	8	54.5	53	38.4	93.8	87.5
BC1211	0	33.2	58.7	57.6	5.5	22.3	94.2	102.1	39.8	52.4	56.7	65.7
BC1212	7.5	32.4	69.9	39.1	73.2	33.7	91.3	54.5	21.8	53.9	63.2	21.2
BC1213	31.6	34.4	5.2	17.9	90.4	56.2	85	32.9	70.7	3.1	63.6	56.5
BC1214	35.1	31.5	68.5	44.9	34.5	29.1	14.4	36	52	39.6	50.3	61
BC1215	0	36.2	20.2	59.4	6.9	24.9	9.7	45.6	35.1	17	118.6	51.2
BC1216	3078.3	3462.8	4535	6170.4	2032.2	4735.4	5359.9	3880.2	4047	7874	8485.9	6794
BC1217	15.8	4.6	12.7	3.1	26	15.9	7.4	46	9	3.8	17.4	11.5
BC1218	9.8	56.6	1801.7	1053.5	5.1	3.9	2330.2	1457.6	29.2	8.3	975.4	1267.8
BC1219	0	8.5	4.5	7	0	0	7.7	17.8	10.9	25.5	7	11.4
BC1220	115	181.4	249.8	412	9.3	298.5	1717.7	389.1	184.8	305.4	374.5	760.2
BC1221	489.6	651.8	510.5	432	341.9	896.7	688.2	822.7	379.9	259.5	594	670.5
BC1222	0	19.5	150.5	151	4.6	3.8	25.9	159.8	11.1	4.2	167.4	21.1
BC1223	68.6	70.9	74.1	80.6	114.2	244.3	104.8	93.6	138.2	157	127.6	155.3
BC1224	4052.5	5241.1	5312.9	6685	5825.9	8936.6	7040.4	8361.9	3879.6	6479.3	4608.1	4637
BC1225	2460.4	5129.7	5135.3	5905.3	5207.5	8842.7	8336.1	6836	4236.1	6024.7	4173.2	5200.9
BC1226	328.1	396.9	404.9	418.9	495	374.6	348.9	309.9	274.1	108.9	285.7	199.5
BC1227	34.8	32.9	37.9	125.4	71.5	70.7	40.1	53.1	26.2	20.3	26.8	20.4
BC1228	63.5	29.6	43.3	23.2	0	20.7	113.2	116.7	98.3	179	124.8	137.5
BC1229	16.8	148.6	44.1	108.2	48.6	224.5	0	168.7	182.1	391.2	135.6	242.1
BC1230	19.9	37.6	26.6	46.8	69.3	57.5	6.9	25.2	66.7	140	24.5	51.4
BC1231	1317	1810	1785.9	2167	1504.9	1635.2	1719.2	1342.1	2542.5	1295	1134.6	1840
BC1232	90.9	137.8	125.9	74.3	26.5	54.2	302.5	155	1201.7	354.5	195.9	776.5
BC1233	158.5	193.5	242	121.2	522	203.5	299.4	197.6	1794.7	438.9	116.6	640.3
BC1236	567.8	379.3	388.7	416.2	195.8	92.6	524.6	212.5	7143.6	1737.5	486	1380.9
BC1237	1073.8	621.9	862.6	927.7	237.8	1350.8	777	485.8	11604.3	3930.1	1134.5	3368.4
BC1239	11.5	28.5	30.2	45.2	0	27.7	79.8	77.1	27.4	84.7	55.6	23.3
BC1240	24.1	61.4	73.6	69.2	45.1	395.5	317.6	203	214.6	272	229.4	357.9
BC1241	544.5	940	1092.9	770.1	686.3	1091.2	1686	1279	1320.2	3380.9	2361.4	2992.5
BC1242	38.1	61.8	30.3	71.8	66.5	23.2	72.8	67.4	76	74.9	63.5	76.4
BC1243	17.9	40.8	85.1	33.7	33.8	35.9	22.7	31.4	60.7	91.5	213.4	91.9
BC1244	10.3	28	27	19.3	42	33	46.7	44	104.8	176.8	85.6	100.5
BC1245	0	16.1	17.1	10.8	8.6	23.8	39.4	43.4	9.9	3.9	8.1	11.1
BC1246	126.7	142.4	213.9	126.5	66.3	150.9	323.9	90	264.4	88	323.7	397.6
BC1247	0	45.5	23.4	11.2	4.5	4.7	24.6	48	57.1	38.8	109.2	38.5
BC1248	21.5	41.6	27.9	32.7	46	94.6	30	94.3	47	70	51.5	55.2
BC1249	56.9	33.9	59.8	16.6	14.4	57	45.5	106.8	35.7	23.1	18	34.3
BC1250	9.3	16.6	12.4	24.7	4.9	27.4	44.1	62.2	19	10.5	18.7	75.9
BC1251	4184.7	4255.2	5283.5	4867.2	5748.9	14195.5	14103.8	8654.8	9054.2	7185.7	10636.8	11505
BC1253	21.4	72.4	156.9	38.5	58.4	170.8	0	44.2	107	373.6	20.2	139
BC1254	63.9	34.1	37.7	45.1	26.3	7.9	67.5	22.5	50.7	168	58.6	32
BC1255	0	156.9	89.7	76.7	20.4	98.4	106.8	146.1	89.5	114.9	197.5	220.9
BC1256	0	8.8	45.7	8.3	10.7	4.9	2.5	43.9	45.1	0	44.4	13.4
BC1257	106.8	13.3	25	0	0	38.3	13.1	12.5	4.5	38.3	9.8	126
BC1258	0	10.6	10.1	0	13.8	0	0	55.6	12.2	37.9	12	6.1
BC1259	14.4	21.4	85.6	12	9.2	6.5	14.8	30.2	4.8	12.2	44.5	45.1
BC1260	680.8	30.9	16.1	155.6	27.6	89.7	75.6	1356.8	129.8	0	290.3	123.1
BC1261	27.7	51.1	25.4	14.1	234	11.7	28.2	41.6	64.7	56.3	70.9	25.5
BC1262	275.3	60.9	63.7	13.8	205	54.7	6.2	27.3	45.3	57.5	65.2	50.7
BC1263	383.5	124.6	9.7	46.9	43.1	20.7	166	32.8	30.1	218.2	182.3	33.4
BC1264	27.4	50.1	41	26.4	58.2	18.4	15	37.1	8.2	4.3	9.5	17.9
BC1265	48.8	88.5	98.7	39.7	63.1	30.6	76.4	91.4	36.3	95.1	72.5	76.6
BC1266	160.9	136.4	122.8	111	78.6	103.8	50.3	131.6	154.2	107.7	90.4	42.1
BC1267	116.8	42	23.1	22.5	57.2	18	43	166.2	39.6	79.1	38	116.4
BC1268	22.7	20.4	34.3	24.9	10.2	9	0	32.8	4.4	23.5	0.8	0
BC1269	39.9	49.7	37.3	17	28	43.1	13.4	25.9	13.8	52.5	19	30.5
BC1270	1055.7	1025.1	1023.6	986.8	1188.1	1039.4	530.7	415.6	488.5	731.4	440.4	547.5
BC1271	85.3	35.3	37.9	34.2	51.8	17.5	5.2	28.1	63.7	62.4	28.2	34.8
BC1272	1073.2	238.9	257.3	200.8	525.7	316.3	248.7	239.5	163.1	124.7	123.2	153.7
BC1273	46812.8	11387.2	10459	10165.8	13783.6	24467.2	14487.6	142201	45515.7	53372.9	68582.6	63852.2
BC1274	20.2	18.7	33.1	0	9.1	24.8	26.9	33.8	100.3	16.5	32.9	59.8
BC1275	0	33.4	35.7	36.1	115.6	106.9	27.1	39.4	62.1	36.2	21.9	18
BC1276	986.9	373.1	416.4	616.6	366.3	831.8	66.5	383	1136	543.4	627.3	465.5
BC1277	69	92.4	102.5	80.6	93.3	110.3	17.4	106.7	55.7	69.9	97.6	67.2
BC1278	4314.5	3537	3043.8	3198.6	2596.8	1671.4	734.7	654.4	1587.9	991.9	588.6	572.6
BC1279	36349.3	34704.4	41322	36047.9	28200.4	60316.2	36576.6	26511	28191.5	23386.2	10184.7	12751.7
BC1280	1066.2	402.7	187.9	115.9	804.7	110	49.5	70.1	192.4	72.9	57.2	55.1
BC1281	37118.3	51800.9	71067.8	61493	53237.3	103853	78019.9	58573.2	51919.4	30933.3	13982.4	21710
BC1282	5912.8	10460.3	10705.7	9909.4	8966	11667.6	6095.6	4906.6	8936.2	4839.7	2844.5	4299.4
BC1283	9479.2	8857.6	8176.1	7936.1	7962.8	5073.2	3236.8	3894	5317.9	3372.8	1727	1432
BC1284	59448.4	50305.8	65360.2	51846.7	67627.9	136327	99264.5	96901.7	72580.3	29901.7	24858.4	39984.7
BC1285	348.9	204.5	247.3	101.2	344.2	215	155.6	137.7	327.1	71.9	173.6	149.5
BC1286	131.5	147.3	103	145.5	92	73.7	17.8	37.6	64.5	9	50	28
BC1287	79.7	95.5	23.4	95.9	101.3	54.5	19.8	33.6	22.5	31.7	38.1	14.6
BC1288	45.2	16.2	41.7	25	52.7	13	11.2	53.7	16.3	6.5	16.7	12.7
BC1289	225.1	54.9	74.3	53.8	24.7	41.7	23.6	76.1	44.3	68.8	72.9	105.7
BC1290	6.7	23.4	9.6	7.9	6	2.9	0	21	28.7	14.4	42.2	11.1
BC1291	163.2	174.7	295.6	191.1	325.9	298.5	317.8	140.3	287	283.1	207.1	253.5
BC1292	0	24.2	30.9	19.7	33.5	5.4	0	72	14.1	20.3	22.9	42.4
BC1293	174.8	66.2	54.9	61.8	159.1	81.5	107.2	123.2	62.9	78.2	124.6	124.3
BC1294	306.6	179.5	243.3	298.7	170.3	373.6	200.1	239.2	235.7	677.4	259.1	421.2
BC1295	0	32.8	44	51.8	183.2	37.8	3.6	38.1	112.7	59.6	95.8	27.5
BC1296	136.9	114.4	55.7	109.6	107.4	98.8	380	228	212.2	230.4	272.4	364.5
BC1297	40.3	81.4	103.4	65.9	50.5	53.1	212.6	173.4	128.8	241.7	231.5	285.6
BC1298	78.2	34.3	37.6	31.5	12.9	7.1	13.2	38.9	27.3	12.4	19.3	50.7
BC1299	49.2	48.1	51.9	72.8	49.7	13.9	25.7	68.4	22	45.9	22.4	23.6
BC1300	220.8	98.1	106.2	71.3	113.7	66.5	227.1	80.7	122	36.7	89.2	80.6
BC1301	29.1	81.7	54.4	68.6	12.7	141	96.6	61.5	57.7	61.1	75	76.1
BC1302	612.5	676.1	628.1	546.8	489.6	461.1	305.8	467.2	1197.3	1576	1169.5	920.1
BC1303	120.3	257.2	223.4	352.2	260.7	924.3	499	535.4	206.2	246.1	110.4	196.5
BC1304	130.1	104.1	185.9	196.4	158.5	699.6	829.6	472	253.2	95.4	141.4	257.9
BC1305	129.1	270.3	296.4	319.8	192.4	819.6	1697.3	582.3	261.8	198.3	226.7	370.8
BC1306	0	25.2	53.6	39.2	42.9	8.9	99.8	42.2	60.4	57.4	22.8	37.4
BC1307	117	92.9	136.2	113.5	127	32.1	164.2	117.9	157.3	149.4	204.8	169.3
BC1308	387.6	1037.1	2055.5	3515.1	1411.5	4113.4	3234.8	2378.7	89.4	346.5	99.1	183.9
BC1309	72	165.7	212.6	357.3	341.9	348.8	478.9	290	67.8	93.9	144.7	209.3
BC1310	41	8.4	5.6	13.9	37.9	7.6	13.2	38.7	19.2	15.4	24.9	24.3
BC1311	22.3	90	100.5	23.2	81	71.2	134.7	203.7	152.1	121.4	111.5	85
BC1312	4353.6	5332	6745.5	7725	8025	9330.9	16671.2	12205.9	8634.4	10391.9	6341	13952.7
BC1313	7365.1	9709.2	11784.6	11908.7	12103.7	21178.2	23145.9	17068.3	19665.5	17100.6	13171.3	19523
BC1316	12618.5	4266.1	5404.5	3080.6	7817.2	10575.8	5061.4	3534.8	11249.7	13946.8	10807.6	9361.6
BC1318	3006.3	1876.4	2343.3	1201.4	2603.2	3429.3	3952.5	2393.3	6524.7	6922.9	6173.1	5751.3
BC1319	250.4	56.9	69.8	74.7	60.5	26.6	102.5	85.3	129.2	78.3	106.5	66.9
BC1320	53.2	51.2	119.9	80.1	117.1	145.8	55.2	58.6	84.1	209.2	123.1	111.7
BC1321	12.3	18.1	0	4.9	0	0	21.9	28.6	7.3	5	14.9	7
BC1322	27.7	33.5	21.7	22	116.9	0	0	51.6	55.1	0	85	39.2
BC1323	25	24.8	36.5	13.5	12.4	17.3	23.3	25.5	20.1	32	18	33.2
BC1324	12.7	17.1	12.6	3.6	8.1	7.3	16.5	20.2	23.6	8.6	38.7	28
BC1325	15	11.2	8.4	6.1	5.8	5.4	6.7	31.8	12.5	14.3	6.6	15.7
BC1326	34.4	15.6	32.2	24.1	2.9	31.8	0	30.7	7.3	43.2	56.3	29.4
BC1327	23.3	16.5	23.1	28.5	5.9	34	22.8	22.2	20.2	36.9	21.6	37.3
BC1328	31.7	49.3	94.3	76.3	21.6	100.6	17.1	37.2	31.6	50.8	37	73.4
BC1329	5.3	58.6	16.9	25.3	63.1	66	18.8	26.7	8.9	54.1	37.3	23.9
BC1330	0	11.9	11.7	0	0	44.3	397.2	5.6	0	9.4	42.9	18.5
BC1331	1049.7	405.8	227.7	229	872.1	364.7	206.6	217	334.9	377.6	269.7	251.9
BC1332	71.3	96.9	96.1	70.7	27.2	183.2	353.4	464.8	3229.3	2368.9	2304.5	1274.3
BC1333	690.2	186.9	203.1	121.7	281.2	865.5	960.7	667.5	3786.4	4564.1	3024.9	2433.3
BC1334	26	21.2	46.9	63.4	14.7	2.5	90.9	48.8	37.1	86.9	70.1	43.2
BC1335	243.5	137.9	106.1	169.2	484.5	241.8	151.6	211.5	173	29	69.6	145.8
BC1336	115.3	158	118.6	159.6	212.2	141.4	69.7	117.4	146.3	192.4	66.2	129.2
BC1337	268.7	122.1	82.4	126.5	221.2	134.9	67.4	83.8	74.8	106.1	36.6	49.8
BC1338	3459.3	2876.4	3301.7	2985.2	3270	2877	2272.3	1203.5	2544	2532.9	2707.7	2950.1
BC1339	1996.9	3280.9	3578.8	3388	3876.6	6744.1	7030.5	4483.5	3264.8	3902.2	3091.8	3635.5
BC1340	1052.8	1181.5	1227.2	1377	567.2	2398	2899.1	1368	1214.1	1038.8	626.6	765
BC1341	45.3	190.6	158.4	212.4	255.2	14.8	416.7	55.2	61.5	77.3	32.7	86.7
BC1342	82.8	118.3	138.3	293.8	132.8	16.6	174.7	93.6	109.5	121	83.8	60.7
BC1343	36.1	110.2	118.4	206.3	94.6	52.7	10.6	80.4	41.3	38.2	85.5	47.1
BC1344	32.6	96.7	51.8	53.9	63.6	43.6	18	97.4	134	140.8	77.9	51.2
BC1345	13132.9	10462.8	12451.3	14240.1	3270.4	22666.7	21877.6	14324.3	16103.4	21119.6	10386.1	9966.4
BC1346	0	0	7.7	0	0	0	0	10.5	0	0	9.9	0
BC1347	0	11.9	0	61.7	28	9.8	0	18.4	5.9	9.3	7.3	14.4
BC1348	189.4	132.2	225.7	133	448.8	265.4	136.1	199.7	293.3	394.8	249.7	263.6
BC1349	1418.6	630.3	619.4	833.2	338.1	601.8	895.2	443.5	374.1	698.2	529.1	525.5
BC1350	0	62.7	57.3	84.9	11.1	100.8	0	93.5	230.1	42	125	170.7
BC1351	15.2	133.4	96.6	160.1	105	234	11.6	87	136.4	68.3	114	211.9
BC1352	23.8	14.9	10.8	0	0	0	0	25.4	3.3	14.3	10.2	5.2
BC1356	22.6	33.5	41.8	16	38.7	10.5	15.1	22.1	13	11.9	45.8	55.9
BC1357	0	45.3	20.5	22	5.5	58.6	15.3	13.1	13	101.9	62.5	56.9
BC1358	7	14.5	3.5	17.3	14.3	7.1	0	13.7	7.9	46.7	6.6	18.5
BC1359	246.9	119.7	55.1	55.6	97.7	81.6	32.1	109.2	111.7	233.4	129.8	301
BC1360	32.4	42.6	61.4	103.7	30	128	17.7	98	85.8	84.4	76.2	127.4
BC1361	121.5	169.3	142.2	221.6	78.1	110.4	207.4	94.2	145.9	152.9	110.8	84.1
BC1362	22.6	89	103.8	60.2	37.3	1390.9	940.8	282.6	1692.7	832	819.7	530.3
BC1363	9.9	14.4	11.7	8.9	8.2	20.7	6.1	35.4	7.6	11.2	9.6	20
BC1364	10	40.7	29.5	64.1	54.8	18.7	47.2	47.5	35.5	37.2	40.5	34.4
BC1365	32.8	77.1	39.8	50.2	49.2	35.2	9.9	85.7	59.9	86.2	70.6	76.8
BC1366	365	1193	952.4	1179.3	709.7	1483.7	642.3	586.6	435.6	322.2	303.8	95.9
BC1367	194.9	125	184.7	211.2	154.2	304	737.3	375.3	290.3	445.5	471.6	516.5
BC1368	621	1431.4	2064.4	1783.6	1988.3	2945.5	5302.2	2553.8	3624.5	4442	5168.1	7857.2
BC1369	590.2	445	556.8	587	571.5	949.5	735.1	590	740.6	729	873.6	779.2
BC1370	3075.8	1560.4	1932.1	1961.7	1916.7	2578.9	2626.2	1671.5	1802.2	2139.4	1735.8	1642.3
BC1371	392.7	522.6	417.3	553.4	568.1	320.7	988.6	577.6	739.5	365.7	660.9	563.8
BC1372	1653.6	1069.3	1088	1192.7	1349.4	1341.4	1664.7	852.3	1277.9	1049.3	1430.4	1031.5
BC1373	563.5	1154.1	961.4	1022	714	1346.8	1590.3	661.7	1208.5	1414.8	934.7	1242.7
BC1374	23.6	35.3	21	44.7	9.2	92.1	32.8	72.8	29.9	63	71.9	97.8
BC1375	817	857.2	919	691	1277.1	380.1	824.6	522.9	803.3	205.7	551.9	187
BC1376	1249.2	1249.1	1086.9	1271.1	1093	972.4	728.7	534.5	1215.5	596.3	1007.7	444.7
BC1377	1361.3	1360.6	1201.3	1455.9	968.4	1648.2	1090.8	1068.9	3010.4	3464.1	2703.9	2371.7
BC1378	25.6	116.5	97.1	77.7	146.6	37.7	312.2	29.7	35.9	73.2	51.3	74.7
BC1379	175.4	264.7	215.7	410.9	238.8	202.4	445	233.1	319.3	320.5	301.8	213.9
BC1380	595.4	295.2	388.4	368.2	258.3	690.5	378.1	297.9	451.4	516.5	494.6	488.5
BC1381	722.4	332.5	521.9	378.7	265	231.2	507.2	356.6	414.6	709.3	272.5	182.3
BC1382	109.1	325.4	297.4	361.1	60.7	510.7	417.4	343.8	396.7	579.8	370.5	345.1
BC1383	27.2	12.4	7.3	15.4	4.7	5.4	21.8	20.2	14.1	17.7	16.5	26.5
BC1385	787.9	833.1	975.2	1110.3	900.8	1503.6	1173.7	681.5	1307.3	1178.6	901.6	1140
BC1386	27.2	219.9	144.1	275.8	28.8	84.1	105.4	77.3	115	52.9	67.5	53.8
BC1387	708.2	508.7	542.8	745.1	180.2	542.6	551.6	238.5	206.9	280.2	252.3	183.7
BC1388	0	35.1	26.9	67.1	0	22.9	117.9	40.6	62.5	120.3	40.7	63.2
BC1389	355.4	429.2	536.1	334.6	389.5	1218.7	925.4	761.8	940.5	598.7	354.7	516.2
BC1390	143.3	158.4	144.4	145.1	101.5	186.3	87.7	79.5	134.6	156.5	115	85
BC1391	0	65.8	21.9	6.6	9.9	37.3	28.8	42.5	18.6	139.2	28.4	7.3
BC1392	39.8	23.9	26.7	37.5	6	0	0	41.9	6.3	5.9	100.6	54.1
BC1393	0	3.3	73.8	52.6	17.3	0	0	36.8	7.5	0	11.4	39.2
BC1394	4246.7	7798.7	7575.7	7485.3	8340.7	23343.3	21130.6	9205.2	13926.7	17405.3	13909.1	12000
BC1395	1792.3	3494.5	4178	2881.6	3511.4	6411.2	4524.4	4248.2	4262	4841	4441	3642.3
BC1396	5094.4	2393.9	1764.5	1524.7	2452.6	3185.5	3640.4	2102.9	6869	3624	7033.5	5020.2
BC1397	6523.9	6473.2	4997.4	4575.3	5666	7820.6	6630.5	4029.8	2885.8	1743	3353.9	2831
BC1399	12120.8	16814.4	12082.7	14998.1	13711.3	22483.8	16800.4	10245.6	4447.6	2903.9	4934.7	3827.4
BC1400	7749.9	17115.6	12732.7	15043.4	14474.7	21105.6	14253.5	12231.9	3486.4	2318.8	4722.8	3576.2
BC1401	4529.6	12022.6	9081.5	13207.9	7900.8	14940.7	10771.5	9406.9	3265.3	2375.9	4111.4	3136.4
BC1402	4629	14573.4	11642.4	16320.3	11697.7	17259.6	14035.1	8529.4	2124.5	1396.1	3260.4	2138.1
BC1410	868	895.8	903.4	934.4	981.8	1645.2	1947.3	871.6	1276	1057.4	2545.9	2095.5
BC1413	205.2	838.7	895.6	940	1208.4	1322.3	1399.7	1138.3	872.8	1014.8	1841.1	1640.8
BC1414	1764.6	1327.1	2450.3	1852.8	1842.7	1885.5	6578.4	2375.3	1718.1	3490.6	3646.8	3841.6
BC1415	623.1	701.5	901.7	978.7	591.5	706.4	584.6	692.6	332	217.3	431.7	379.5
BC1416	1775.2	1949.8	2564	3275.4	1721.7	2980.5	3442.4	1837.9	4548.5	3342	3290.7	3783.9
BC1417	83.8	154.3	180.8	129	267.1	179.1	243	139.2	192	188.4	162.2	173.2
BC1418	10.5	13.4	2.2	6.2	9.4	15	7	25.6	17.3	34.6	5.4	6.4
BC1419	421.6	303.5	328.3	283.4	428.4	629.7	370.4	333.8	1361	1380.2	1204.6	1345.8
BC1420	1512.3	2726.9	2256.7	2246.2	3912.6	2575	3293.1	2539.8	11203.3	12576.6	12225.4	8847.7
BC1421	1924.8	1420.4	929.7	723.1	2551.2	1357.9	1310.7	708.2	10677.2	6060.3	9307.1	6380.5
BC1423	10361	4288.5	4863.5	3691.1	7057.8	12218.1	11988.4	8480.2	15620.3	13953.8	10600.7	14317.4
BC1424	7929.4	4374.8	5250.7	3587.2	7617.3	13937	12907.2	9065.5	10885.8	8590.6	9305.9	11025.3
BC1425	10415.3	5161.8	7210.7	6456.9	7231.3	20742.6	17746.2	16892.7	13321.8	10029.4	10034.1	12560.3
BC1426	3214.4	2664.9	2708.4	2400.3	4070.5	5077.1	6383.4	3099.7	8184.4	5076.7	6051.7	7813.6
BC1427	3923.2	3063.1	2533.1	2467.1	5319.9	5312.9	4647.4	3049.4	7471.1	5357.2	6288.8	6806.7
BC1428	2883.8	1791.9	2298.7	1586.4	3289.4	2943	4409.6	2228.4	3707.9	3141.6	3561	3640.8
BC1429	9878.9	4467.3	6188.9	4718.1	3777.9	5420.8	5191	5637.4	7949.2	6222.2	7301.3	7312
BC1430	394.6	186.6	153.8	170.1	100.9	226.3	472.2	222.4	803	508.3	247.5	550.9
BC1431	16.9	50.3	23	38.8	74.3	23.8	10	41.3	29.4	16.4	6.2	60.4
BC1432	346.7	333.4	239.6	504.9	417.7	148.2	44.7	148.5	77.5	80.6	57.4	62.9
BC1433	65.8	44.6	44.5	34.9	0	0	16.8	28.6	76.3	0	15.5	22
BC1434	49.8	90.4	76.8	104.6	69.6	40	59.5	96.5	125.7	155.8	167.8	122.5
BC1435	0	24.6	69.1	34.9	0	177.2	0	102.1	25.8	4.7	46.5	96.3
BC1436	165	24.4	86.4	58.5	5.6	49.4	15.6	59.7	40	39.4	31.5	54.9
BC1437	428	177.5	196.8	224.5	519.4	289.9	345.9	167.3	160.2	113.3	126.6	178.8
BC1438	298.4	186.6	184.8	205.2	353.9	61.3	328.9	91.4	230	354.9	202.1	353.3
BC1439	273.1	221.2	319.1	265.2	144.7	94.1	188.1	226	206.3	343.5	412.4	324.2
BC1440	4444.7	4032.3	6691.7	6717.1	1505.5	5106.2	3959	3237.6	3715	6228.2	3023	4352.6
BC1441	355.3	228.2	267.5	362.4	229	310.4	516.7	357.1	393.9	272	142.4	411.1
BC1442	3242.4	6669.9	9754.6	8100.8	1612.4	10547.4	14548	8446.7	12873.7	29491.5	16517.2	23062.4
BC1443	417.1	593.1	559.8	590.4	695.3	1377.6	1575.3	1087.1	1298.8	2495.3	1670.7	1746.7
BC1444	176.1	323.8	206.7	147.8	444.2	535.8	181	221.1	435.7	536.4	428.9	734.7
BC1445	0	10.5	12.8	4.5	0	0	0	29.4	12.3	33.5	3.9	0
BC1446	149	81.4	48.4	105	220.9	69.1	22.8	67.6	97.3	54.2	134.1	133.1
BC1447	257.4	114	172.5	77.2	34.2	294.3	321.7	226.3	318.7	639.5	266.6	666.1
BC1448	19087.5	25383.8	21815.7	29513.9	30772.8	42464.1	19534.6	24678.7	1410.1	3156.5	1521.9	2365.2
BC1449	79.4	307.5	223.4	380.2	348.3	168.9	69.5	315.4	65.3	78.9	77.7	95.4
BC1450	148.3	360.9	197.8	320.3	353.4	135.8	252	337.5	46.6	8.7	96.6	77.5
BC1451	0	50.6	31.8	82.4	64.7	31.6	43.5	86.9	18.5	0	22.8	11.8
BC1452	98.4	410.4	589.3	557.8	285.8	359.1	157.5	298.9	109.9	133.6	90.6	90.9
BC1453	195.5	316.6	342.6	334.9	274	172.4	72.7	117.4	145.8	66	71.1	73.4
BC1454	449	297.1	360.1	615.5	391	62.3	83.3	123.6	121.3	23.2	90.2	4.7
BC1455	48.1	36.3	36.4	25.9	14	54.2	28	40.1	38.4	42.4	67	28.5
BC1456	65.2	35.3	28.8	8.1	27.5	22.6	42.9	42.9	30.4	50.3	23	46.4
BC1457	268.8	370.1	0	2.8	52.8	256.2	0	63.7	288.9	570.2	21.1	22.3
BC1458	32.8	69.4	72.6	68	175.4	43.2	30.5	55.4	77.1	53.8	24.2	39.5
BC1459	128.7	141.7	173	197.9	107.6	134	112.9	123.1	177.5	130.4	120.6	193.2
BC1460	3826.4	4227.9	6641.7	6694.9	2951.4	12727.5	9181.5	6989.9	5639.4	6756.9	6202.7	6347.9
BC1461	475.5	298.3	208.5	309.4	285.8	236.8	409.9	470.3	588.4	822.3	460.6	746.4
BC1462	50.6	86	60.9	42.2	140.9	45	231.1	72.1	133.9	83.6	55.8	60.3
BC1464	472.4	710.7	885.4	785.5	672.2	1333.5	731.8	938.9	662.2	1316.4	1113.4	1023.9
BC1465	205.1	169.1	167.8	222.6	136.5	154.6	292.6	162.1	271.2	112.5	144.5	191
BC1466	625.5	454.4	367.1	352.5	664	259.5	1262.3	420.2	421.6	429.2	473.1	338.7
BC1467	1343.3	1586.9	1768.5	1294.3	1034.1	1601.7	2290.7	1558	2131.4	3989.5	3329.5	2669.9
BC1468	14.3	7.8	16	6.4	33.2	17.1	56.6	17.9	68.5	8.5	55.4	14.5
BC1469	44.6	19	26.5	13.7	23.1	39	18.4	84.1	24.1	40.7	39	73.8
BC1470	63.2	10.5	7	26.8	13.8	18.9	31.1	21.7	15	9.1	56.2	44.3
BC1471	26.6	13.4	10.6	22.9	24.6	14.3	12.6	33.8	28.2	34	43	18.6
BC1472	465.8	677.9	798	888.2	595	564.8	896.1	569	220.5	259.2	214.2	246.3
BC1473	456.2	330.4	404.5	561.6	691.5	241.5	159	150.3	150.5	319.2	61.4	91.7
BC1476	792.2	719.6	973.2	719.7	696.4	1425.3	778.1	711.2	932.5	668.7	445.2	958.4
BC1477	629.6	746.1	619.9	502.2	797.1	404	293.7	281.3	212	228.3	183.8	149.8
BC1478	1569.7	945.6	802.6	551	865	800.2	262.5	277.2	254.2	258.4	160.6	228.9
BC1479	91.3	169.8	185.6	69.5	234.5	89	41.9	92.8	15.9	24.2	31.7	16.4
BC1480	21.3	18	13.4	21.8	67.7	8.7	13.8	40.9	16	8.7	14.4	45.9
BC1481	30.6	161.8	154.3	161.8	222.1	121.6	79	139.5	86.3	199.4	133.7	108.3
BC1482	455.8	1298.1	1942.3	2536.2	1129.4	1271.4	1197.5	1087.1	843.3	692.9	662.1	1164.5
BC1483	1786.6	1737.9	2648.1	2989.4	756.3	6895.7	8098.7	2203.7	5869.1	8495.5	6046.5	6760.1
BC1484	86.4	79.3	54.5	74.9	19.2	7.3	80.5	47.1	21	61.1	15.9	13.2
BC1485	84.6	156.5	129.9	104.7	126.6	70.1	218	103.2	83.8	118.8	136	160.8
BC1486	135.2	129.5	78	107.3	139	125.4	143.5	84.7	65.9	171.1	80.4	138.3
BC1487	603.3	169	81.7	216.5	390.3	83.5	38.3	77.5	116	180.7	235.2	104
BC1488	593.4	269.9	224.4	233.3	598.2	383.3	315.7	171.1	227.2	346.3	378.1	298.2
BC1489	331.4	172.7	151	101.9	175.7	109.2	156.9	126.1	372.3	356.8	341.5	377.2
BC1490	417.1	456.2	313.1	379.6	521.9	843.5	875.3	308.4	781.7	1046.8	988.8	779.8
BC1491	18929	16112.2	18745.2	22049.5	14001.1	27418.5	18356.2	17449.4	11739.8	9958.1	10616.8	12209.1
BC1492	759.3	688.7	1247.6	767.5	391.1	2462.5	3895.6	1390.4	1269.7	3561.8	2662	2355.9
BC1493	598.8	600	1048.4	1407.7	437.2	3167.9	5408.6	1627.1	1139.5	3528.7	2406.6	2684.6
BC1494	541.4	715.4	925.3	694.3	649.8	1368.2	1770.3	1253.2	819.3	1398.1	1611.1	1559.2
BC1495	36.6	145	296.6	219.6	135.3	58.6	89.7	135.4	87.3	134.1	217.2	201.3
BC1496	109	116.9	128.8	84.7	44.4	63.8	22.4	103.1	68	30	31.2	45.5
BC1499	1555.3	658	827.7	824.5	743.9	765	979.6	605	459.6	619.2	419.3	519.2
BC1500	0	3.3	20.3	0	0	63.6	12.9	38.8	11.4	0	11.3	13.3
BC1501	0	3.9	18.7	1.3	0	6.1	0	12.9	1.3	4.4	22	38.6
BC1502	5	12.9	19.8	6.7	19.3	7	22.1	11.4	7.4	32.7	4.8	13.9
BC1503	0	10.6	20.6	0	10	9.6	14.8	15.4	0	0	4.2	11
BC1506	15.9	25.7	235.4	242.8	7.1	6.8	313.5	113.5	44.1	41.1	56.6	28.8
BC1507	976.1	386.4	452.4	527.1	131.7	445.8	250.1	254.3	412.7	769.8	251.7	148.8
BC1508	708.4	722.4	800.7	745.2	785.5	659.5	769.7	612	634.2	822.5	668.1	636.7
BC1509	143.5	135.9	158.6	180	117.3	129.1	103.8	136.3	102.6	103.4	446.7	233.7
BC1510	83405.9	68468.6	73961.9	71874.3	36582.1	65753.7	52276.5	45076	39788.9	35885.1	31142.1	25578.8
BC1512	485.5	197.9	74.9	220.4	258.5	340.8	31.9	133.7	97.4	53	103	81.7
BC1514	101.2	203.2	200.2	407.3	75.2	87.8	536.1	90.3	230.3	424.2	208	230.2
BC1516	94.1	126.4	69.4	150.5	82.5	219.2	16.3	83.7	197.5	60.1	107.3	76.7
BC1518	2058.6	1706.5	2070.1	1537	1473.9	4002.8	4870.9	2436.8	3785.2	7352.8	8440	7470.2
BC1519	426	405.5	336	363.1	733.1	264.8	151.4	127.2	351.6	326.7	498.1	242.3
BC1520	2482.6	4587.7	5882.7	5776.4	4625.5	7357.6	10487.2	4437.4	12519.9	26849.4	19489.5	16766.7
BC1521	1407.5	3083.6	3919	3173.3	2696.8	3705.8	5954.9	3717.7	3792.2	3400	3125.3	3634.3
BC1522	11133.2	12005.8	14267.4	13261.8	12735.4	16164.5	17693.9	13062.7	19426.1	11640.4	14615	14887.1
BC1523	8203.5	7984.7	11262.6	11329.5	7155.3	12781	15044.2	7699.3	16364.2	10485.6	7982.3	15239.3
BC1524	18297.6	16624.9	21670.8	18413.3	13754.7	29295.6	31722.4	19444.7	27403.4	20802.1	22471.2	26597.1
BC1525	360.2	74	105.6	125.8	29	46	158.1	60.1	78.2	39.2	61.2	74.8
BC1526	29.4	59.1	48.3	53.9	36.6	47.4	21	74.6	34.2	38.4	33.4	56
BC1527	27.6	4.9	7.1	8.4	3.3	15.3	41.7	27.7	8.7	10.9	12.4	26
BC1528	582.3	824.7	913.5	960.1	767.4	1054.2	1289.4	1044.8	1894	1805	2408.2	1726.9
BC1529	10.2	10.6	8.3	3.3	0	21.3	5	39	8.1	5.5	12	24.2
BC1530	40.1	77.4	59.5	78.7	67.3	76	155.9	51.7	96.2	125	52	80
BC1531	273.5	144.3	181.8	78.8	107.6	85.3	57.8	107.8	97.6	14.4	99.8	43.1
BC1532	156	260.7	221.3	441.3	369.2	469	94.7	255	401.7	120	213.7	256.8
BC1534	132.2	91	98.2	82.6	255	97.5	16	76	145.2	149.7	192.8	167.7
BC1535	93.1	52.6	79.7	66.4	44.6	52.9	116.7	65.4	170.4	116	162.2	106
BC1536	302.6	103.5	114.2	100.2	180.7	148.6	165.9	118.4	166.8	237.4	239.9	243.6
BC1537	390.3	199.9	260.7	192.4	178.7	289.6	343.1	173.5	318.7	391.1	398	441.2
BC1538	0	40	19	8.6	44.8	13	7.1	33.5	14.6	44.7	11.6	12.7
BC1539	531.6	838.6	1808.4	1243.3	264.1	1188.3	2039.7	1223.3	897.3	728.2	415	737.3
BC1542	561.7	112	77.4	100.7	203.4	98.1	111.3	169	299.6	307.6	117.8	185.4
BC1543	212.9	210	160.4	215.2	294.4	230.4	159.6	165.8	212.3	138.1	135.2	152.5
BC1544	355.2	261	128.4	563.9	436.7	22.6	244.6	34	169.4	320.2	155.5	217.5
BC1545	3209.4	732.4	730.7	639.5	1383.1	382.5	229.9	187.1	381.6	539.5	490.5	333.4
BC1546	640	557.6	675.3	582	644.2	1016	414.8	619.3	862.3	977.6	887.4	808.5
BC1547	116.5	96	55.8	66.3	72.5	74.5	57.9	118.8	88.4	160.5	64.5	47.1
BC1548	247.7	115.6	119.9	126.7	251.6	155.1	9.2	44.9	67	80.6	62.4	47.2
BC1549	0	42.8	53	30.2	136.4	39	12.8	14.3	23.2	12.5	61.7	19.9
BC1550	171.8	162.7	147.2	180.6	178.9	499.5	46.7	129.6	73.1	119.2	141.8	102
BC1551	2111.9	1704	1455.3	1205.9	3986	2002.9	1217.9	446.6	2714.8	1864.1	2143.2	1248.2
BC1552	2556.1	3436	3724.9	4450.7	3598.2	5413.1	4751.3	3187.7	3817.1	4692.3	4418.9	2905.3
BC1553	2815.6	5827.3	10329.8	11458.8	1231.3	19280.4	19042.8	15455.5	12100.9	16660.3	12039.9	14227.2
BC1555	87.7	52.7	42.3	41.4	914	66.9	21.4	68.7	31	6.4	19.7	50.3
BC1556	30.5	375.7	393.7	488.2	536.8	934.4	2090.9	776.2	3844.8	13011.9	12143.8	8166.3
BC1557	271.1	471.4	525.5	380.3	1088.1	1631.4	3196.1	1033.7	3280.8	11232.5	8212.7	7623.9
BC1558	3215.7	7041.8	11928.6	12318.3	3585.4	11153.3	10002.6	4852.4	2272.5	3543.7	2474.1	2810.6
BC1559	53.6	23.2	47.7	8.6	33.1	5.3	39.3	90.2	61	222.7	215.3	253.1
BC1560	50.7	167.8	1138.4	585.3	113.6	50.7	969.8	670.2	236.3	226.6	1083.4	777.2
BC1561	58.5	86.4	115.7	74.2	21.5	89.6	73.7	48	31.9	59.5	33.6	20.6
BC1562	2030.6	4403	5380.2	5920.1	3135.6	5416.4	4334.5	3255.4	3940.3	4114.2	3508.7	3562
BC1563	240	354.7	281.6	399.9	404.1	273.9	132.2	281.2	221.5	330.6	378.3	185.5
BC1564	450.7	854	1429.9	1316.8	1368.4	763	699.6	735.3	842.8	2145.8	2427.6	1434.7
BC1565	150.5	131.4	142.4	142.3	215.6	72.3	340	137.7	288.6	369.8	594.7	591.3
BC1566	825	589	822.6	632.6	828.5	811.2	1238.6	504.8	1878.8	3174.1	3645.2	3060.5
BC1567	146.3	45.1	21.1	79.4	27.2	26.7	6.3	32.6	23.3	189.9	190.2	122.8
BC1568	23.1	31.3	30.5	25.5	36.6	23.1	29.2	46.2	76.8	24.6	54.2	43.9
BC1569	142.9	77.3	43.5	5.2	97	7.5	4.6	28.5	24.2	52	94	37.3
BC1570	44.3	65.3	28.7	42	58.7	5.5	43.6	90.7	22.8	9	49.9	20.2
BC1571	161.3	106.2	101.7	169	156.7	253.8	195.1	181.9	205.7	270.7	108.8	261.4
BC1572	248.8	186.5	178.6	186.9	214.5	179.2	147.7	147	120.9	76.8	154.1	138.8
BC1573	216.5	81.7	156	103.9	307.5	8.8	77.5	276.9	94	24.3	151.3	154.7
BC1574	401.9	204.6	366.8	258	314.5	433.2	237.7	288.6	195.7	71.5	262.7	225.9
BC1575	565.1	458.3	447	431.2	378.2	221.9	548.1	462.6	401.1	133.9	485.3	294
BC1576	1331.2	937.1	928.9	946.6	885.7	1443.9	877	1049.2	1031.1	744.2	1039.2	935.3
BC1577	128.1	121.5	181.4	106.3	79.7	34.7	39.8	133.5	116	63	93.9	164.2
BC1578	46.5	83.3	45.7	40.2	51.8	75.3	13.8	100.5	29.1	33.8	44.9	43.2
BC1579	109.8	43.6	53.5	98.6	10.8	126.3	29	42.7	36.2	42.3	85.6	75.8
BC1580	33.9	45.7	43.2	9.4	10.4	38.8	48.1	29.2	27.3	65.3	43.1	297.7
BC1581	313.7	390.7	398.1	562	494.4	141.3	139.9	190.7	1022	634.2	742.3	806.7
BC1582	0	96.1	107.5	112	233.3	89.8	41.1	60.1	138.2	114.7	175.7	109.3
BC1583	428.5	431.1	272.9	250.2	664.5	252.4	341.3	246.9	1241.9	850.6	612.8	395.2
BC1584	695.3	606.4	322.6	170	1136.4	254.9	959	186.7	1477.7	1144.9	734.9	798.9
BC1585	1508.9	932.2	499.5	284.6	1384.1	387.8	369.3	200	1903.5	1404.5	825.8	977.6
BC1586	1877.3	1114.5	818.6	433.2	1896.6	734.3	1134.6	612.5	2214.2	1977	1313.3	1071.6
BC1587	759.7	678.8	528.5	368.5	961.5	541	762.6	487.8	902.2	909.7	592.4	652.3
BC1588	248.5	269.6	261.7	140.7	500.4	149.3	141.5	137.3	249.7	184.8	153.5	136.8
BC1589	1792.4	675.2	444.1	345.7	1731.6	206.1	537.2	208.7	949.6	696.7	506.7	362.5
BC1590	770.5	371.5	404.3	244.9	944.2	458	349.9	245.8	633.8	1036.9	617.3	617.4
BC1591	82.4	39	20.4	33.3	34.7	248.9	42	22	32.6	63	18.4	12.8
BC1592	49.8	37.9	48.8	46.4	51.3	78.2	70.1	79.3	65.3	88.4	69.3	110.5
BC1593	100.6	162.9	129.8	110.2	249.4	66	92.1	130.1	170.5	218.3	263.8	211.2
BC1594	716.7	326.2	814.4	762.7	211.4	966.6	719.1	566.2	1010.6	1603.9	1459.9	1800.3
BC1595	80.7	122.1	360.2	155	109.5	96.4	179.7	390.5	23.1	20	26.7	26.6
BC1596	62.1	49.8	101.6	52.8	193	52.9	137.6	62	196.5	222.6	182.8	316.9
BC1598	39.5	125.2	74.1	123.2	111	76.9	79	179.1	110.9	151.1	80.8	138.3
BC1599	0	10.4	34	26.1	8.9	3.7	0	89.1	19.4	34.8	20	14.1
BC1600	112.9	50.7	64	19.1	61.4	51.6	23	28.4	91.1	2.8	62.9	28.7
BC1601	0	88.7	60.6	96.7	122.8	0	54.5	106.8	96.4	124.4	54.2	67.9
BC1602	245.3	182.5	170	271.6	81.1	111.8	154.2	181.9	550.1	339.4	343.1	256.1
BC1603	5957.6	2933.8	2584.3	1992	891.5	2375.7	1715.8	1776	1928.4	2280.4	953.3	694.8
BC1604	26	7.3	8.6	19.9	18.5	4.9	4.4	17	7.1	2.3	4.3	3.3
BC1605	223	925	1230.5	1070.2	777.3	1154.6	1683.5	1790.5	445	1809.3	885.4	1446.8
BC1606	4344.5	5074.6	7169.7	7064.3	4992.5	7869	14510.6	10166.6	5845.7	12041.4	8796.6	10678.4
BC1607	196.2	296.8	464.1	435	530.3	629	531.2	510.1	682.8	1118.4	895.3	1090
BC1608	1681.2	2690.7	3277.8	2579.7	5130.2	3652.2	6750.7	2671.4	16730	9280.9	7750.1	8113.9
BC1609	1706.7	3315.1	4294.1	3450.9	5906.1	8628.2	8687.7	5976.9	18352.7	9531.7	8979.6	11891.4
BC1610	4112.3	4165.1	5221.1	3896.3	4446.5	9495.6	17937.8	6870.1	12640.4	14386.4	22233.1	26699.9
BC1611	316.6	398.5	550.9	353.3	1015.6	888.7	878.5	985.4	960.4	1401.7	1580.3	2352.6
BC1612	3.9	33	30.2	19.4	66.8	27.7	15.2	31.8	60.5	37.2	72	48.9
BC1613	17.5	14.4	9.8	9.5	27.4	20.5	30.5	43.6	18.7	39.4	16.4	28.4
BC1614	0	14	9.8	8	48	29.7	14.1	29.8	11.2	4.6	29.9	23
BC1615	56.8	73.4	54.2	53.2	70.1	108.2	147.5	38.7	105.5	72.9	75.7	149.3
BC1616	23.8	17.5	9.6	7.1	24.7	11.8	14.8	26.3	12.1	20.1	9.5	23.2
BC1617	174	27.6	52	101.7	55.7	103.1	89.6	75.7	48.6	14.7	69.8	61.9
BC1618	68.4	34.3	2.3	246.6	0	18.7	0	76.4	10.6	55.5	40	15.4
BC1619	25.4	99.9	109.4	54.7	19.2	299.1	440.6	197.3	145.9	393.2	309.2	219.9
BC1620	12.8	69.1	109.5	78.3	18	22.3	89	102.6	20	19.2	8.6	30
BC1621	23.6	32.6	21.6	26.5	13.3	37.3	12.5	54.3	21.5	17.2	16.6	17.5
BC1622	267.9	9.2	36.9	200.3	0	10.9	13.6	12.7	4.6	0	6.4	0
BC1623	252	133	543.8	424.4	60	452.9	254.2	190.6	503.5	156.8	277.9	112.1
BC1624	21.7	34.1	16.9	77.9	13.4	17.8	35.1	41.3	41.5	23.6	38.7	34.5
BC1625	64.1	43.4	25.6	21.7	97	53.7	88	40.5	25.6	14	18.1	77.6
BC1626	64.9	72.7	94.5	53	73.6	75.8	233.2	42.2	56.7	90.1	15.3	64.7
BC1627	31.8	68.6	49.5	59.2	22.3	38.3	7.5	77.7	18	10.3	26.1	50.3
BC1628	58.1	26.5	20.7	36.5	51.1	31.7	11.6	32.5	14.3	17.5	27.5	27
BC1629	13.9	28.2	17.8	13.2	68.8	20.8	13.3	45.7	35.8	11	26.5	30.8
BC1630	32	28.4	8.4	1.9	104.7	15.2	4.9	21.2	23.1	26.3	20.8	23.1
BC1631	6.7	23.7	107.4	33.3	0	21	8	38.7	34.1	18.1	49.3	21.8
BC1632	502.5	71.9	116.7	114.9	48.3	67.7	25.1	28.8	29.1	28.6	30.3	56.2
BC1633	164.9	134.1	131.4	158.3	100.1	397.2	47.5	97.2	67.1	7.9	54.1	80
BC1634	216.7	57.2	38.9	48.4	53.4	16.6	210.6	19.1	32.2	45.8	39.3	24.6
BC1635	19.8	16.9	14	4.5	20.2	13.5	143.6	10.2	37.8	16.8	3.1	34.5
BC1639	0	20	45.8	6.7	5	0	0	11	42.4	110.1	7.3	6.6
BC1640	0	80.8	112.5	40.2	97.4	50.2	74.1	93.1	137.1	260.5	257.8	140.3
BC1648	0	121.4	4.1	9.5	77.1	0	15.7	29.8	6.3	0	20.5	27.1
BC1649	16.2	16.1	5.8	15.5	64.8	3.3	13.8	39.5	4.5	7.4	10.9	14.4
BC1652	14.4	94.1	40.8	120.6	28.6	62.5	0	66.5	56.2	155.4	55.3	92.1
BC1653	140.6	124	44.3	97.6	68.7	247.5	11.8	18.6	39.1	69.1	44.7	65.3
BC1654	50.9	37.8	22.5	3.9	29.7	12.3	17.2	53.1	51.4	31.5	21.5	30.8
BC1655	1751.5	1017.3	709.1	750.4	1178.6	520.7	456.6	391.4	1846	1446.9	1392.4	1158.8
BC1656	11.2	9.6	14.5	19	3.1	11.5	11.8	38.9	14.1	32.2	15.7	19.1
BC1657	31.6	27.7	32.8	67.4	2.3	99.6	8.4	42.6	24	19.5	29.4	15
BC1658	49.5	26	21.5	20.6	32.5	46.9	99	27.2	24.2	40.9	18	51.8
BC1659	100.8	53.5	80.2	99.4	13.7	90.9	25.1	77.2	34.6	59.1	31.8	74.5
BC1660	63.7	105.9	127	41.2	21.5	221.8	36.6	109.6	59	30.1	43.3	42.1
BC1661	138	27.5	23.6	12.5	233.2	22.5	166.5	9.7	7.2	23.2	6.2	24.7
BC1663	24	13.4	13.7	22.2	16.4	10.3	0	56	14.1	0	9.4	15.5
BC1664	12.9	7	13.6	16	7.7	17.2	0	32.3	11.2	0	2.3	19.8
BC1669	8.3	17.1	13.1	11.2	17.8	52.4	9.9	25.5	8	5.1	6.6	23
BC1670	33.4	12.9	13.2	7.3	6.5	9.6	12.7	39.5	13.9	17.3	13.7	25.9
BC1672	350	82.2	66.1	87.3	64.6	140.5	151.9	96.2	113.7	168.3	167.9	115.2
BC1673	100.2	127	66.1	32.5	336.8	161.5	96.9	111	78.5	154.9	172.4	91.1
BC1674	36.6	54.7	100.7	78.4	30.2	126.5	137.4	134.7	62.2	116.6	62.6	101
BC1675	230.1	107.7	75.3	102.4	92.1	26.7	123	166.3	97.6	28.5	53.6	56.6
BC1676	179.3	84.1	154.6	248.7	24.6	169.1	66.4	139.9	119.9	141.9	167.4	150.8
BC1677	122.4	129.5	121.1	95	150.1	79.3	130.9	108	54.2	227.3	123.9	108.8
BC1678	100.7	103.6	130.5	160.3	76.2	51.8	0	18.8	242.5	147.4	29	56.1
BC1679	0	64.8	91.2	107.6	0	0	88.1	35.2	155.3	203	65.7	300
BC1680	63.6	43.7	31.1	42.9	55.8	41.8	28.8	74.5	25.5	17.1	17.9	8.3
BC1681	16.5	28.3	51.2	30	7.4	6	12.1	24.8	23.1	41	23.8	13.4
BC1682	264.7	91.7	67.6	119.7	49.5	83.8	33.5	55.2	66.4	52.4	29.8	20.1
BC1683	21.6	13.5	3.2	6.4	17.9	6	6.4	35.7	5.9	2.1	15.2	8.2
BC1684	27.5	8.5	14.2	3.4	17.2	10	9.7	51.4	12.5	11.1	15.3	35.9
BC1685	32.6	23.9	43	12.7	19.7	40	35.2	126.4	47	36.9	27.4	90.3
BC1686	24.3	25.6	12.1	13.5	35.8	6.5	6.7	33.5	11	16.6	28.1	12.4
BC1687	0	29.7	15.7	27.5	2.4	2.1	7.4	69.9	18.1	54.1	26.6	50.9
BC1688	519.7	1201.3	1279.1	2217.1	870.2	2827.2	451	774.5	30.1	43	46.1	12.9
BC1689	25.6	246.4	495.8	969.2	57.5	1383.8	360.4	564.5	12.1	27.9	17.2	7.2
BC1690	7.9	25.5	18.4	15.8	23.4	19.7	17.4	25	39.1	9.9	17.4	53.9
BC1691	41.3	35.4	96.1	37.3	70.6	36.7	0	30.5	125.7	278.8	235.6	136.6
BC1692	18709.5	19507.3	23419.5	27068.9	6454.8	23248.5	6069.1	10930.7	1571.1	2490.9	2277.5	2400.5
BC1693	31.2	93.4	184.2	98.6	143.6	124.7	75.4	119.3	104.4	181.1	145.1	173.8
BC1694	344.1	110.4	149.7	159.3	107.3	283.7	824.7	179.5	144.4	467.3	420.6	307.4
BC1695	0	179.2	84.7	118.4	223.2	53.6	669.5	235.4	102.9	330.3	244.8	186.7
BC1696	23.3	221.3	146.8	206	178.9	94.7	253.7	155.6	207	228.5	220.5	213.8
BC1697	18.3	14.6	10.4	5.5	9.9	6.3	14.4	31.3	10.5	19.7	19.1	8.6
BC1698	7.3	22	25.6	250.7	3.6	33.3	11.8	41.4	22.3	18.7	23	25.1
BC1699	38.3	48.7	67.8	81.5	88.8	92.2	75	104.2	114.3	66.5	133.7	158.5
BC1700	4.5	12.5	16.6	6.5	48.3	9.4	13.5	27.1	71.1	3.5	12	20.3
BC1701	460.9	817.6	1083.4	1032.2	926.5	925.2	1244.6	844.5	720.1	811.5	930.8	1011
BC1702	1305.8	3148.2	3415.9	3622.2	2162.7	3128.6	2216.6	2000.1	2914.1	3657.9	4037.7	3063.3
BC1703	65.7	105.9	52.7	71.5	98.4	14.2	20.5	79.6	67.2	73.1	83.8	108
BC1704	156.1	76.2	40.2	52.6	50.9	56.4	94	65.2	64.5	21.8	57.7	117.5
BC1704b	47.6	17.6	9.7	26.1	6.5	22.9	8.8	34.6	2.8	17.6	9.5	15.6
BC1705	35.4	16.7	14.9	10.6	11.5	1.5	32.1	26.2	19.7	24.6	43.6	18.8
BC1706	11	3.6	12.5	14.4	9.4	4.9	6.5	16.3	7.4	10.3	9.6	3
BC1707	10.9	9.1	3.8	5.4	9.3	13.1	19.5	32.1	8.6	9.1	6	15.7
BC1708	0	20.1	21.5	19.7	0	8.8	36.2	31.4	4.9	23.1	17.8	43.9
BC1709	13	24.1	9.8	22.2	24.3	6.8	9.8	59.9	13.2	8.6	22	12.7
BC1710	0	46.8	18	23.5	5.7	53.9	296.2	61.1	30.6	98.1	38.9	36.1
BC1711	5.8	8.3	5.3	8.9	7.4	0	20.7	22.7	4.9	5.2	10.5	22.1
BC1713	130.5	57.6	62.1	3.6	35.2	240	34.2	23.5	52.6	193.5	70.4	66
BC1714	0	12	20.6	4.6	0	0	26.8	66.8	0	14.1	6	26
BC1715	38.8	35.7	17.6	13.7	67.4	18.1	11.4	84.6	18.6	49.6	24.8	32.7
BC1716	37	45.5	33.5	42.9	37.9	35.3	66.4	42.8	43.4	33.8	31.2	28.4
BC1717	1086.2	1039.5	1185.9	943.3	758.9	2101.2	2537.7	1491.1	2484.6	5239.3	4679.1	4648.3
BC1718	52.4	116.4	49.7	27.8	119.1	5.1	32.1	41.8	26.2	91.3	93.2	84
BC1719	215.2	76.9	32.1	115.9	52.5	5.7	8.8	43.7	113.6	105.2	107.9	27.6
BC1720	120.1	49.1	39.7	75.9	292.7	130.5	18.7	33.2	69.7	62.3	82.3	80.6
BC1721	5.8	3.7	2.2	1.2	26.7	7.5	0	21.4	4.6	2.4	2	4
BC1722	74	11.2	10.1	24.3	92.6	7	10.4	27.8	56	9.9	26	3
BC1723	37.7	34.4	22.4	10.8	8.4	30.1	59.9	41.1	21.9	18.7	68.7	62.1
BC1724	18.3	23.8	17.9	19.2	39.5	3.5	11.8	54.9	28	52.7	37.7	60.6
BC1725	156.5	192.5	284.9	307.4	111.4	81	307	272.5	244.4	185.3	114	257.1
BC1726	111.4	213	192.9	206.3	264.7	100.5	52.9	59.1	170.4	148.6	171.9	82.4
BC1727	36.4	43.1	55.5	45.4	0	45.9	253.5	104.5	171.3	81.5	95.6	106
BC1728	14.7	56.2	70.8	14	82.3	185.8	63.8	110.5	100.3	64.2	99.1	26
BC1729	110.2	46.5	45	28.9	51.6	68.1	103.9	67.4	75.6	63.6	71	86.4
BC1730	10.1	18.5	36.7	5.7	14	8.4	0	28.3	9.6	9.5	48	8.4
BC1731	103.8	43	49.5	46	20.2	29.4	8.1	67.7	194.2	52	65.3	32.5
BC1732	18.4	93.4	51	55.8	9.7	120.4	47.1	21.5	32.6	36.4	84.7	33.8
BC1733	10	41.7	54.3	17.7	74.9	17	16.5	37.5	31.2	83.3	58	36.5
BC1734	19.1	22.6	18.7	26.2	46.6	77	17.8	54.9	15.8	20.2	28.5	6.3
BC1735	3.7	36.5	26.7	14.3	43.5	18.5	59.2	55.3	37.6	22.2	20.6	30.3
BC1736	13	48.5	28	26.2	23.7	14.2	27.5	55.7	45.9	21.1	41.4	45.7
BC1737	38.3	14.7	12	8.8	5.1	7.2	10.9	94.3	35.8	12.1	11.1	50
BC1739	17.1	19.9	13.1	1.4	10.3	14.5	24	24.3	16.5	4.3	22.2	54.7
BC1740	55.4	29.4	57.8	22.2	5.3	18.4	34.2	22.4	27.9	31.7	62.3	26.8
BC1741	24.9	45.7	32.1	29.9	38.4	49.6	41.1	76.1	49	27.8	49.1	46.1
BC1742	17.7	13.2	18.6	9.4	12.4	5.9	12.5	21	9.3	19	20.9	29.4
BC1743	20	12.6	14.3	18.2	6	11	3	26.1	35.9	3.6	10.4	41.2
BC1744	231	141.1	148.2	148.3	115.8	318.2	106.3	176.3	198.7	206.1	214.7	187.6
BC1745	9629.6	7966.7	10742.9	11627.2	5711.8	18703.8	20678.1	18094.3	18053	13011.7	12873.3	18302.3
BC1746	193.6	197.4	188.8	187.6	123.2	456.2	237.1	243.6	474.9	423.2	488.4	403.5
BC1747	79.2	123.2	73.3	180.2	125.8	97.3	24.9	154.6	311.2	406.8	371.6	375
BC1748	24.1	57.3	41.6	26	85.3	55.9	51.2	34.8	164.5	75.3	54.9	66.3
BC1749	179.2	203.2	281.6	289	193	195.7	147.7	126.8	160.1	49.8	96.5	86.1
BC1750	302.3	150.7	106.1	192	73.8	35.3	116.4	89.7	29.6	62.5	42.8	35.1
BC1751	93.2	124.3	119	173.8	171.6	101.5	125.1	113	93.8	71.1	49.1	134.2
BC1752	61.8	46.9	29.2	11.7	4.2	14.1	5.7	31.6	92.6	50.8	15.6	39.8
BC1753	72.7	131.4	130.8	229	159.9	72.2	90.3	108.1	276.8	145.5	185.6	199.2
BC1754	72.7	82.1	104.8	100.7	27	159.4	0	98.5	138.6	131.1	118.7	89
BC1755	245.5	240.2	186.1	226.9	323.1	179.2	111.5	170.8	474.3	96.2	208.2	217.4
BC1756	7.7	37.3	7.7	9.8	0	21.2	11.5	15.8	13.3	0	26.1	31.1
BC1757	48.9	24	12.2	9.4	26.8	7.7	25.2	29.7	15.2	43.2	30.1	22.7
BC1758	31.8	50	47.8	23.3	46.3	35.5	194.5	31.7	62.7	45.4	45.7	37.4
BC1759	45.2	41.5	52.3	21.9	66.7	12.3	9.4	57.1	88.9	47.5	96.7	119.5
BC1760	196.1	91.7	132	163.1	16.1	54.3	31.5	93.5	56.1	118.6	255.2	135.9
BC1761	4.1	28.9	36.3	22.7	10.8	16.8	106.7	48.3	52.7	63.2	50.2	40.7
BC1762	35.9	58.5	57.3	36.5	71.1	39.9	20.1	31.8	85.9	42.1	44.8	28.5
BC1763	521.8	419.9	355.9	313.5	433.1	468.8	275.2	259.3	439.6	319.5	403.3	304.5
BC1764	98.2	68.2	76.6	127.8	93.2	78.9	36.3	60	108.2	120.2	121.7	119.9
BC1765	450.6	249.5	264	182.1	186.4	324.7	295.4	201	256.4	315.1	404.3	413.2
BC1766	176.8	98.5	130.6	165.2	87.9	79.1	39.1	71.8	146.5	97.5	301.7	198.8
BC1767	14.2	10.7	5.1	8.3	4.4	59.9	7	23.3	8.2	2.5	16.9	14.7
BC1768	5.9	10	14.8	28.2	6.2	72.8	17.6	62.8	29.7	19.6	15.3	21.1
BC1769	2614.5	1638.5	1836.4	2057.4	1381.4	4086.7	4037.4	2834	3118	4887.2	3911.2	3483.5
BC1770	0	6.3	4.6	5.9	26.9	408.9	15.1	25.3	5.7	2.9	7.1	3.4
BC1771	243	237.6	230.7	251.7	127.4	261.5	79.5	148.6	96.6	38.7	62.8	145.1
BC1772	22.5	33.7	56.1	32.5	73.4	9.6	123.2	57.6	104.6	24	68.8	135.1
BC1773	0	13.6	17.8	26.2	3.1	10.4	13.7	25.6	4	8.4	26.6	5.8
BC1774	471.7	608.6	686.1	934.8	309.1	522.8	659.2	1170.6	875.5	1466.2	798.9	921.6
BC1775	18.2	14.7	9.6	10.8	35.7	20	20.3	27.2	11.9	4.5	12.4	16.6
BC1776	19.2	63.9	23.5	31.8	80.5	105	60.9	106.9	161.9	340.2	210.7	204.5
BC1777	81.8	99	88.4	125.2	163.3	475.3	215.3	234.4	306.3	433.5	437.4	578.3
BC1778	17.9	55.2	9.6	14.2	91.4	45.8	58.7	95.7	105.5	63.5	144.6	52.4
BC1779	509.5	182.1	205.5	214.6	794.4	375.1	625.3	227.6	679.6	671.8	747.3	815.7
BC1780	291.8	191.7	359.4	266.2	241.2	403.4	333.5	338.1	366.6	643.3	655	591.3
BC1781	195.5	183.5	230	326.6	295.2	455.1	874.7	392.4	389.8	832	716.8	794.9
BC1782	225.5	334.3	262.2	203.8	314.6	291.8	236.9	345.2	387.7	575.5	271.2	425.7
BC1783	811.5	536.8	478.4	387.4	575.3	349.1	194.3	182.4	320.1	307.5	194.5	307.2
BC1784	47.2	33.6	51.7	33	13.4	87.6	3.8	37.9	21.2	47.2	40.2	54.3
BC1785	155.1	23.3	21.6	17.2	6.5	18.3	15	26	50.9	16.1	49.6	39
BC1786	259.3	81.4	76.1	113.1	55.6	38.5	218.9	62.4	92.1	66.7	145.7	152.4
BC1787	6.3	34.6	31	24.8	7.7	49	21.4	43.7	39.4	50.7	54.2	31.3
BC1788	154.3	68.5	76.8	69	140.6	56.9	46.3	111.9	44.4	151.2	93.5	79.5
BC1789	237.6	176.7	164.9	279.2	140.6	123.9	21.7	152.8	121.3	131	79.7	133.1
BC1790	303.2	219.2	244.9	305.7	65.7	68.1	99.1	72.3	66.4	103.6	67.9	98
BC1791	10.1	67.8	40.6	44.4	28.3	60.3	33.1	59.1	52.1	138.9	112.9	39.6
BC1792	62.3	94.5	101.6	151.7	5.6	6.6	10.2	64.4	60.2	211.7	112.3	189.3
BC1793	435.1	748	994.2	1375.3	829.7	1029.4	649.3	410.4	310.6	304.4	243	389.3
BC1794	49.9	31.9	21.5	36.8	89.8	12.1	14.8	33.5	6.2	47.4	34.9	20.3
BC1795	12.8	29.5	6.6	9.2	32.3	10.4	4.1	6.7	22.6	2.7	17.3	35.9
BC1796	146.7	44.8	53.1	158.3	127.1	94.2	52.5	36.1	67.5	25.9	46.7	43.1
BC1797	142.2	77.5	39.9	72.8	38.8	52.8	57	75.2	49.4	60.2	47.6	75
BC1798	65.7	9.9	67.9	63.7	10.7	11	0	131.2	38	92.6	76.7	49.6
BC1799	1152.3	1270.9	800.1	760.3	314.9	706.4	811.7	417.9	1396.7	922.3	810.7	1262.7
BC1800	64.9	50.2	41.8	68.8	42.2	7.4	3.7	23.7	45.9	109.4	7.9	8.4
BC1801	121.1	51.2	85.4	47.1	61.4	5	12	55.9	41	13.6	28.6	24
BC1802	32.5	96.5	78.4	35.3	137.4	184.1	69.4	110.7	192.8	150.4	142.8	158.4
BC1803	99.9	42	33.9	54.2	160.4	27.7	16.3	62.7	48.2	24.5	31.8	25.6
BC1804	253.4	171.5	86.2	215	205.2	119.2	113.3	88	39.6	188	92.8	82.7
BC1805	52.4	19.2	4.1	18.3	6.7	13.2	7.8	46.8	15.6	12.8	13	23.2
BC1806	706.7	692.3	673.2	550	612.8	865.4	1236.4	432.6	832.6	1051.5	893.4	988.5
BC1807	234.8	61.5	59.2	51.4	45	25.9	139.3	117.9	92	119.5	101.4	93.1
BC1808	0	10.9	5.7	6	0	5.1	0	19	7	0	3.6	6.2
BC1809	261.9	59.5	35.5	71.6	109.4	21.3	104.5	34.6	46.6	10.5	6.8	20.2
BC1810	419.6	185.3	263.8	115.9	178.1	167.2	119.8	113.8	34.8	41.5	26.9	38.4
BC1811	45.4	18.1	16.7	24.1	5.2	23.4	11.3	25.3	5.3	9	15.7	3.6
BC1812	28.6	37.8	27	52.8	49.7	11.7	39.8	100.8	93.3	35	95.8	22.9
BC1813	334.5	98.3	123.2	137.9	75.4	33.2	188.6	121.6	124.9	40.3	94.9	154.8
BC1814	188.2	147.8	103.8	129.3	244.2	105.1	36.1	96.9	84.1	75.3	129.8	108
BC1815	189.2	203	217.9	170.3	91.1	432.5	182.7	258.9	451.4	216.9	265.8	316.2
BC1816	178.1	69.6	58.9	84.2	26.4	27.2	22.1	92.2	158.8	131.6	31.3	199
BC1817	41.9	9	24.4	4.8	0	8.9	8.8	34	13.3	13.9	14	27.1
BC1818	19.3	63.2	64.4	78.3	32.8	24.2	24.1	59	52.4	17.7	23.5	21.6
BC1819	171.1	175.9	165.7	246.4	165.2	96.4	530.3	124.1	217.3	289.9	183.3	231.1
BC1820	1403.6	1352.6	2027.1	2303.6	1398.7	2181.4	2237.4	940.1	617	676.1	769.1	630.9
BC1821	147.7	379.8	469.7	559.5	402.1	585.2	267.8	233.3	102.1	87.9	104	95.2
BC1822	447.2	566	552.2	848.7	647.7	512.3	808.6	431.2	282.6	191.8	314.2	359.1
BC1823	335.5	291.9	501.2	467.7	175.5	444.9	215.8	515.8	198.5	243.8	163.4	205.3
BC1824	48.9	81.3	85.9	73	0	163.4	0	85.8	101.4	97	90.1	49.8
BC1825	37.9	25.5	10.6	11	24.7	41.7	7.7	21.2	50.4	27.2	44.7	20.6
BC1826	2.2	64.3	108.7	72.7	0	38.5	9.6	59.2	129.6	7.9	61.8	19.1
BC1827	44.8	183.3	121.8	185.5	9.4	277.7	16.9	37.3	170.5	106.9	84.7	0
BC1828	727.9	359.4	341.7	332.4	500.1	538.6	162	180.2	439.1	681.5	531.8	413.6
BC1829	31.5	24.7	21.1	36.1	32.5	21.8	0	22.3	22.8	15.1	15.9	38.4
BC1830	146.4	143.3	124.2	211.2	143.9	145.7	184.6	57.2	41.5	102.1	54.7	59.7
BC1831	15.2	8.1	8.4	9.2	13.6	3.3	5.1	24.4	8.1	26.6	20.8	15.7
BC1832	28.8	72.2	44.1	67.8	79	51.6	26.1	43.1	79.2	78.2	59.3	64.3
BC1833	10.7	17	4.6	4.6	9.2	4.8	56.9	46.5	32.2	7	9.6	13.5
BC1834	497.7	112.3	225.7	185.7	98.8	103.1	285.1	299.3	299.6	185.5	104.7	315.8
BC1836	199.5	280.1	246.2	307.2	114.6	125	108.8	129.6	85.5	59	22.2	29.4
BC1837	47.7	53.9	96.2	106.9	55.4	11.7	0	74.7	82.3	102.8	145.5	21.4
BC1838	7.9	7.7	6.9	2.7	10.1	6.2	9.5	29.8	12.3	9.6	13.8	6.4
BC1839	44.5	25.8	31.2	38.9	6	43.9	18.5	56.7	19.5	7.7	47.9	122.6
BC1840	11	18.5	8.8	15.9	4.3	12.2	3	56.1	27.3	62.9	8.5	30.7
BC1841	24.6	29.9	11.2	16.8	49.1	16.6	47.3	97.8	42.9	40.2	51	63.4
BC1842	9.4	38.6	34.8	14.7	48.6	68.9	7.3	49.4	22.7	27.2	3	18.2
BC1843	60.4	67.6	38.5	86.6	74.6	59.7	84.4	34.2	18.1	11.9	24.7	45.6
BC1844	253.5	88.9	84.3	46.2	72.1	28.6	107.9	69.8	131.6	150.2	154.7	217.6
BC1845	65.4	17.1	6.1	8.3	14.1	190.6	0	80.5	30.8	0	5.5	26.6
BC1846	30	30.6	58.6	14.5	46.8	26.1	9.1	23.7	16.4	6.9	10.2	21.4
BC1847	4380.5	5055.7	6759.2	8695.4	4036.6	12679.4	11447.1	8095.1	9704.4	14789.4	7254.7	9624.8
BC1848	309	248.3	193.2	235.7	74.4	152	168.3	217.1	116.6	128.8	94.2	40.5
BC1849	47.6	90.6	56.7	74.7	1.8	22.2	15.9	43.6	19.8	16.2	68.6	90.9
BC1850	617.9	591.8	1070.5	676.7	154.3	321.9	698.4	377.3	459.8	816.6	463.9	580.9
BC1851	52.1	16.5	20.2	31.2	9.8	52.9	26	158.1	21.1	42.6	2.1	103.2
BC1852	275.1	250.3	434.8	536.9	103.4	1574.2	1281.1	1275.2	755.7	1128.3	337.2	1054.6
BC1853	0	5.3	2.4	0	6.1	0	0	7	2.7	44.2	4.4	0
BC1854	0	4.9	3.7	3.5	4	8.3	25.5	13	13.9	7.2	26.5	25
BC1855	0	9.4	4	3.9	3.2	69.5	22.8	21.9	6.7	2.9	8	5.7
BC1856	92.2	5.3	8.2	0	4.9	9.8	29.8	32.8	4.3	0	30.8	16.5
BC1857	4.6	25.8	9.5	6.3	33.1	15.6	0	102.7	19.7	31.1	13.9	44
BC1858	0	29.5	15.3	2.7	14.3	0	0	69.9	6.5	6.5	18.4	4.5
BC1859	0	8	142	1.6	0	9.7	15.3	15.4	4.3	4.5	52.7	25
BC1860	0	30.1	43.9	10.9	26.9	35	34.5	32	78.1	64.7	62.9	61.9
BC1861	0	13.7	6.1	1.6	3.9	8	34.3	33.6	8.2	11.5	24.9	24.9
BC1862	0	54.8	15.3	6.5	17.4	68.4	17.3	36.1	24	25	43.9	29.6
BC1863	18.6	19.1	17.6	33.2	26.5	15.7	18.9	41.6	16.9	33.2	36.7	38.4
BC1864	4.6	15.5	18.7	10	11.5	13.2	4.4	42.5	25.4	2.3	15.7	17.3
BC1865	16.1	5.2	9.6	1.3	0	0	0.9	29.1	17.6	7.1	15.6	146.8
BC1866	26.5	7	6.1	0	10	26.2	38.3	13.8	10.6	52.5	19.5	14.4
BC1867	13.7	22.5	10.6	14.7	0	15.7	0	32	33.7	13	12.3	36.4
BC1868	12.3	23.1	4.4	4.9	12	11.1	0	57	12.1	21	33	134.3
BC1869	23.5	9.1	20.2	2.6	7.6	20.1	4.7	21.5	19.5	34.9	23.5	26.9
BC1870	0	7.9	10.2	0	0	9.3	0	18.2	21.2	7.2	5.2	5.4
BC1871	0	3	10.7	2	10.4	11.1	6.9	13.2	13.1	0	12.1	6.1
BC1872	230.1	10.9	7.8	0	0	116.6	153.2	61.7	5.5	5.5	4.3	60.4
BC1873	0	83.5	59.9	0	74.5	7.3	30.8	16.8	8.5	0	26.7	32.1
BC1874	0	31.2	0	3.6	14.8	38	135.3	50.8	84.7	36.6	22.9	96.8
BC1875	0	14.5	11.1	48.4	37.5	11.4	14.5	45.5	17.1	25	26.9	21.8
BC1876	157.2	44	16.9	27.3	44.8	4.2	6.5	209.7	62.4	44.7	45.2	87.3
BC1877	0	10.1	5.4	13.7	72.7	2.8	13.9	38.3	46	53.2	81.7	56.9
BC1878	0	5	0	4.5	127.3	0	233.6	75.1	172.3	70.2	56.4	24.5
BC1879	15.2	35.3	18.8	3	67.4	0	14.5	13	68.3	58.6	74.7	67.2
BC1880	37	38.1	19.1	38.6	92	64.6	12.9	49.9	76.9	170.8	143.7	113.7
BC1881	4.7	83.5	21.8	112.2	50.7	128.6	18.8	160.1	37.8	118.1	298.5	486.9
BC1882	20.9	9.3	41.4	22.5	0	0	55.7	86.1	36.6	159.6	23.9	130.2
BC1883	310.7	114	144.9	27.1	26.5	148.5	365.6	199.1	170.3	114.1	130.3	96.9
BC1884	239.9	35.3	68.9	46.6	12.1	52.3	32.6	53	63.8	67	172.2	112.2
BC1885	54	81.4	130.5	70.9	100.4	139.8	465.5	107.4	118.3	139	201.4	119.3
BC1886	102.7	43.4	89.6	44.4	8.3	45.2	128.6	31.6	22.2	55.4	90.3	75
BC1887	31.4	47.3	58.3	40.3	58.5	181	72.7	67	37.3	81.2	145.3	109.1
BC1888	48.1	104.8	110.1	18.7	306.3	266.1	26.5	122.2	174.7	173.2	111.5	293.2
BC1889	144	360.9	636.1	524	179.3	121.1	258.8	307.1	513.5	703.7	429.7	628.1
BC1890	42	24.6	13.2	7.5	76.3	31.8	17.7	46.7	14.5	10.9	34.1	30
BC1891	22.9	20.6	9.5	8.4	19.1	21.7	22.6	53.1	20.8	44.8	28.1	23.8
BC1892	8.2	15.3	6.5	4.1	14.9	7.9	36.6	44.4	5	7.2	23.7	35.3
BC1893	0	40.9	16.3	4	30.9	9.8	37.7	26.3	29.5	4.6	16.6	35.8
BC1894	29.4	16.2	12.7	23.1	24.7	20.2	23.5	41.2	4.4	1.6	8.2	16.6
BC1895	0	6.9	0	0	0	0	0	15	39.1	0	0.7	29.5
BC1896	24.7	11.6	7.5	2.6	17.6	11.5	9.6	31.9	28.2	5	12.8	58.7
BC1897	15.4	11.7	4.1	1.4	2.9	12.4	11.4	34.4	11.2	8.9	16.8	11.7
BC1898	0	18.3	4.3	0	0	0	14.7	27.2	9.2	80.9	5.4	9.6
BC1899	11.5	8.9	10.6	0	6.9	0	0	18.5	4.7	6.3	1.9	6.5
BC1900	0	2.8	2.1	0	4.9	0	22.3	11.5	11.4	10.4	5.3	12.8
BC1901	34	31.9	12.4	0	25.7	21.4	23.6	24	16.7	6.7	17	14.8
BC1902	0	4.2	4.6	4.6	0	0	0	14.1	11.8	0	7.6	16.3
BC1903	191.7	78.8	98.5	32.3	86.3	44.8	67	100.4	53.3	49	59.1	90.4
BC1904	0	7.7	3.9	4.3	14.8	14.6	7.3	15.8	10.2	4.9	1.8	14.7
BC1905	0	20.1	35.7	32.6	13.7	33.9	20.3	31.6	13.4	13.4	20.5	26.9
BC1906	14.7	22.3	12.5	12.9	20	27.1	28.8	83.3	35.5	24.8	16.4	59.8
BC1907	6	5.1	14.3	12	21.5	4.8	34.5	24.8	10	5.7	14.5	22.1
BC1908	13.3	16.3	11.2	7.2	11.9	15.3	15.2	37.9	13.8	26.3	13.8	27.1
BC1909	36.4	28.6	6.5	7.5	32.1	22.6	48.5	26.7	13.7	21.4	18.1	11.9
BC1910	57.5	16	24.7	3.7	0	22.9	37.4	21.4	31.9	21.8	30	19.9
BC1911	0	12.2	9.4	2.4	1.7	20.1	5.6	33.9	6.3	1.6	8.6	10.8
BC1912	723.1	544.6	344.6	401.8	631.5	280.4	628.9	234.4	703.7	480.5	419.7	373.8
BC1913	493.9	452.4	284.3	380.9	653.8	258.6	189.8	227.8	669.5	495.8	288.5	239.5
BC1914	69	411.4	461.9	474.5	263.3	332.4	919.4	580.4	442.2	921.3	638.9	506.9
BC1915	46.4	296.1	346.2	247.9	183.8	96.3	736.5	461.7	546.1	772.2	1525.5	1540.8
BC1916	15.3	5.9	2.7	0	6.9	0	0	22.5	6.5	69.5	2.5	14.8
BC1917	18.2	10.6	4.9	0	0	5.9	28.1	32	13	11.2	2.2	23.2
BC1918	24.5	7.8	16.2	19.1	0	22.8	32.7	40.6	9.6	10	11.3	13.9
BC1919	31.8	32	17.8	13.8	25	46.1	29.3	52.9	19.8	21	23	25.7
BC1920	0	10.6	21	3.9	9	79	9.2	52.3	14.1	27.6	22.3	53
BC1921	224.9	156.1	145.4	190.8	163.6	83.5	41.4	105.7	198	90.9	123.3	93.2
BC1922	439.8	77.2	37.1	39.2	91.4	0	29.2	48.5	33.9	0	29.8	45.4
BC1923	137.8	121.8	97.9	107.3	54.2	64.4	374	151	193.7	415.1	220.6	300.4
BC1925	21.9	3.8	3.9	5.6	21.5	5.2	2.1	25	10.7	3.7	3.9	6
BC1926	26.4	76.9	97.2	81.2	39.7	33.8	16.6	27	72.4	132.6	46.2	20.7
BC1927	817.5	1032.8	1346.4	966.8	1455.8	4082.4	5543.3	2718.5	3642.1	6273.7	8872.2	10220.8
BC1928	242.6	669	668.5	525.2	777.3	1226.3	2414.5	1251	2446.7	3262.2	3822.3	4291.1
BC1929	729.6	370.4	521.1	289.7	603.1	740.2	1967.6	925.8	1231.6	1646.4	2145	1996.8
BC1930	479	659.2	716	518.8	696.4	970.4	1911.5	810.7	1750.6	2388.4	2381.9	2466.3
BC1931	323.4	548.3	704.6	472.7	589.4	1318	2697.3	1177.6	1320.3	2922	2630	3051.3
BC1932	43.2	25.9	9.6	14.3	24.8	76.8	0	18.5	63	33.6	22.7	22.7
BC1933	0	9.2	18.8	4.7	43.3	3.3	0	10.9	8.5	1.5	28.6	4.4
BC1934	5.6	56.6	24.4	51.9	12.5	4.8	12.4	23.5	71.1	67.9	37.1	48.7
BC1935	328.5	263.2	202.5	238.4	98.6	134.8	94.9	132.6	119.4	193.6	136	92.8
BC1936	422.1	614.4	646.2	759.9	265.8	596.1	274.9	547.6	215.8	282.5	167.3	132.2
BC1937	288.6	424	421.1	703.5	163.2	496.3	171.5	222.7	150.9	76.7	117.6	182.1
BC1938	262.5	910.9	752.2	1474.8	836	950.4	883.8	689.5	10.7	5.4	11	28.3
BC1939	60.7	217	316.1	444.6	164.6	136.6	64.2	152.8	11.6	6.8	7	10.8
BC1940	54.7	115.1	89.2	154.3	325	100.4	98.5	108.4	65.8	40.1	90.9	98.3
BC1941	15.4	17.6	17.8	32.5	40.3	12.2	18.1	45.7	18.5	78	19.2	46.6
BC1942	85.5	15.3	8.7	12.7	9.8	4.7	4.8	31.3	29	14.9	14.8	23.9
BC1943	6.9	11.9	9.1	6.4	12.7	8.8	10.2	24.1	9.9	6.2	11.4	16.4
BC1944	7.9	43	25.7	5.7	5.6	35.8	23.8	44.2	39.3	21.2	52.7	31.2
BC1945	25.6	25.1	18.8	24.7	3.3	50.7	23.5	38.5	41.4	84.1	74.7	95.1
BC1946	0	11.6	5.1	4.2	6.7	0	4.1	22.7	5.8	6.1	17.6	4.2
BC1947	2847.4	2711.4	3537.2	3680.2	1805.4	8033.5	11156.8	5258.7	6790.1	18221	14405.5	13298.8
BC1948	0	102.4	230.9	123.4	98.5	211.6	42	149.1	46.1	15.4	111.4	79.2
BC1949	48.4	102.9	103.5	153.9	114.9	10.9	29.6	98.4	72.8	21.5	63.4	25.7
BC1950	52.7	21.6	14.4	41	17.7	14.6	240	52.5	27.6	14.8	27.4	25.2
BC1951	114.6	65.8	144.5	53.7	214.4	10.6	28.2	73.9	114.7	35.4	46.5	42.5
BC1952	1184.2	1256.9	1813.6	1505.2	1406	1972.1	2179.7	1626.9	1314.8	1686.7	1545.8	1774.2
BC1953	3336.4	2017.3	2310.9	2189.8	2024	1875.9	1018.5	941.7	1834.8	1010.2	1363.1	1200.8
BC1954	42.4	86.8	66.8	164.1	34.9	51	27	90.9	13.7	38.2	25.6	39.3
BC1955	52.5	44.5	51.4	30.5	49.2	100.8	79.9	37.8	22.2	44.3	53.6	69.1
BC1956	51.9	38.2	38.4	21	91.6	52.3	4.4	67.7	144.6	139.9	34.6	16.6
BC1957	16.2	75.8	79.9	55.8	55.6	168.8	58.6	80.1	86.4	46.9	69.5	135.4
BC1959	235.6	442.1	309.4	403	271.2	177	159	107.8	379.2	550.2	318.5	205.2
BC1960	5	17.9	36.4	62.3	12.6	23.6	43.6	54.6	3.4	10.6	18.3	13.4
BC1961	47.4	278.3	560.8	450.7	340.5	544.9	176.8	610.6	266	215.8	301.8	206.1
BC1962	362.7	464.6	634.1	390.8	310.3	838.9	558.6	554.1	188.2	222.4	216.5	116.4
BC1963	499.6	294.6	266.6	316.3	398.9	346.6	105	348.3	568.7	589.6	668.9	376.8
BC1964	1661.4	1192.3	1513.7	1252.1	1034.2	4182.3	2494.1	1396.8	1544.9	1885.9	1096.3	1710.9
BC1965	2417.1	1771.8	2261.4	1880.6	1969.8	5417.8	2639.8	2500.3	1408.6	2189.9	1920.1	2475.4
BC1966	3297.1	1874	2552.1	2441	1966.7	7427.8	4348.6	3561.3	1802.1	3350	2672.4	2949.2
BC1967	489.7	477.1	667.1	441.6	338.6	487	285.7	390.5	210.1	287.6	237.9	538.4
BC1968	26.9	14	10.8	6.7	20.9	36	7.1	26.3	13.4	12.6	8.6	13.5
BC1969	196.2	92.1	88.2	99.5	140.5	67.2	5.5	47.7	40.8	80.2	70.8	115.2
BC1970	6.9	14.1	12.4	3.3	4.9	7.5	0	12.8	26.2	6.2	12.1	13
BC1971	17.5	15.6	8.4	10.4	4.4	1.8	12.6	17.7	12.7	11.2	27.5	10.3
BC1972	50	32.6	19.1	24.2	68.6	36.2	21.3	63.3	32.3	20	22.6	45.8
BC1973	16.1	35.9	31.1	10	58.9	81	8.5	31.9	55.1	22.6	44.2	24.2
BC1974	168.8	251.8	168.2	123.6	651.6	283.4	63.8	133.9	211.2	175.4	154.3	137.9
BC1975	905.1	333.3	66.8	133.2	773.7	74.1	96.2	37	242.9	143.7	131.8	140.7
BC1976	41	41.8	30.2	34.4	61.3	16	8.4	45.1	96.5	56.4	37.6	28.4
BC1977	8.2	11.3	17.4	12	3.4	8.2	0	21.9	33.3	4.1	23.1	4.5
BC1978	1284.7	1200.5	1105.9	1185.4	1451.8	655.7	598	416.8	1210.5	1162.1	977.3	820
BC1979	402.9	239.5	237.7	171.3	412.6	145.5	244.3	144.7	379.8	353.9	284.3	258.1
BC1980	120.1	64.6	78.9	129.4	83.7	99.2	74.2	130.5	98.4	77.3	86.5	67.4
BC1981	145	116.6	158.5	29	16.9	59.3	10.8	47.4	92.7	75.7	80.2	178.3
BC1982	186.8	74.6	121.7	46.8	330.6	43.8	253.2	96.5	77.1	49.7	91.5	117
BC1983	94.6	40.1	76	54.2	74.6	92.7	10.9	90.3	48.7	37.5	71.7	57.4
BC1984	0	71.7	196.6	364.7	65.6	44	77.7	82.8	61	155.7	112.8	176.5
BC1985	10.4	48.9	24.4	16.1	10	7.5	15.7	50.4	45.1	22.8	31.6	33
BC1986	14	27.6	12.9	20.6	71.6	5.8	13.4	67.8	30.9	5.5	9.3	12.8
BC1987	348.5	196.9	223.5	154.3	548.6	317	266.7	161.1	93.7	89.5	171.6	119.4
BC1988	0	73.8	81.5	15.5	41.6	179	0	6	179.7	205.8	67	66.3
BC1989	54.3	24	60.6	52.2	6.6	6.2	37.6	100	13.6	5.4	73.4	39.2
BC1990	16.5	45.3	27.9	37.3	13.4	2.6	5.2	18.2	75	49.8	45.5	20.7
BC1991	90.4	71.3	81.7	53.2	34	16.4	44.2	22.7	156.3	148.8	129.1	56.4
BC1992	947.3	1522.7	1607.1	2135.9	786	2853.8	985.3	1655.7	162.5	469.6	487	500.4
BC1993	934.5	1629.1	2978.1	3053.2	1595.6	2922.3	1323.9	1473.9	676.6	704.6	325.2	746.4
BC1995	7	17	11.5	25.3	22.1	5.4	0	28.3	13.8	24.1	12	16.1
BC1996	296	671.8	714.3	546.3	769.3	153	474.1	201.3	698.4	669.3	384.1	187.1
BC1997	748.1	805.9	934.8	769.9	740.9	1565.3	3580.5	1262.6	2672.1	3363.4	5043.4	5529.4
BC1998	0	28.9	152.1	47.8	6.5	5.8	19.3	68.5	86.5	58.9	171.6	82.8
BC1999	99.6	25.6	25.3	9.5	50.3	17.3	48.6	63.6	28.4	28.6	15.9	39.6
BC2000	24.1	11.7	13.3	10.2	6.3	12.5	14.9	45.5	10.3	11.6	13.7	7.2
BC2001	284.3	95	138.2	93.3	121.9	109.9	203.3	143.9	215.5	115.8	311.8	76.4
BC2002	8379.4	13535.2	17087.3	19015.3	6584.2	38855.1	28852.2	27616.5	12127.3	18814.1	9204.4	11459.6
BC2003	2210.5	3856.8	4786.3	4636.3	2427.4	8397.5	9943.5	6308.9	1177	1531.8	897.5	1562.8
BC2004	202	253.7	357.7	274.9	129.1	400.6	893.3	330.8	207.8	214.9	156.7	265.7
BC2005	2565	2465	2536.9	2462	2210.8	4393.6	4770	2651.7	5470.1	3475.3	5232.1	4282.8
BC2006	49.6	49.3	87.7	33.1	26.1	96.7	47.6	41.3	42	74.6	54.8	114.4
BC2007	400.5	1074.7	1549	1170.3	200.3	854.5	278.1	734.3	266.9	188.1	109.1	237.5
BC2008	262.8	1074.1	1598	1585.1	203.5	2728.5	815.8	1356.8	281.5	294.2	187.5	376.2
BC2009	121.6	418.3	307.8	491.6	200.2	669.8	454.7	382.2	229.5	215.9	223.5	157.4
BC2010	4	6.3	7.8	9.3	9.2	3.1	6.6	34.2	7.3	12.5	18.2	10.9
BC2011	10625.5	14395.2	20124.1	20824.7	5078.3	25106.8	19746.8	11427	6111.5	9790.3	6395.5	6033.5
BC2012	9555.8	9591	11664.7	13778.4	5016.2	21928.7	9913.8	10009.5	5006.9	8132.8	4373	4472.1
BC2013	340	271.2	269.1	296.2	366.2	240.4	132.6	188.5	409	381.5	330.5	355.4
BC2014	5.5	70.9	38.7	35.9	57.9	18.9	35.8	31.7	76	8.7	103.6	53.3
BC2015	0	14.8	52.7	30.3	0	16.3	371.1	77.3	70.8	21.3	12.2	98.7
BC2016	3.8	27.2	23.8	18.1	31	35.7	30.8	31.6	27.1	2.5	29.9	22.5
BC2017	1012.7	400.3	330.8	401.7	513.6	391.4	188.1	439.9	503.8	578.2	475.2	704.8
BC2018	301.5	622.1	750.5	958.7	241.2	415.4	362.7	437.3	729.8	712.4	481	544.2
BC2019	117.2	133.4	159	210.6	205.9	504.2	140.3	145.1	72.9	127.3	85.5	69.7
BC2020	124.6	85.8	68.5	104.5	12.2	100.2	20	81.3	257.6	150.4	72.3	83.3
BC2021	24	54.8	31.5	44.2	34.9	33.2	51.7	54.5	61.3	46.3	76.4	66.9
BC2022	335.7	559.5	664.5	947.7	412.6	498.4	587.2	353.8	350	490.2	336.4	335.5
BC2023	195.9	241	233.3	164.4	68	560	563.3	268.6	374.1	401.5	370.5	444.8
BC2024	168.4	152.9	224.2	254.6	182.6	76.2	144	165.1	201.6	170.4	168.3	171.1
BC2025	57	130.1	134.6	161.2	161.9	203.3	90.1	108	122.2	145.1	112	53.5
BC2026	6566.3	3046.7	3579.2	1748.5	5184.8	6412.3	7240.2	4762	11617.2	12516.3	10249.7	9528.5
BC2027	253.3	248.8	101.6	143.6	469.9	562.2	616.8	290.7	482.5	157.3	248.6	143.3
BC2028	82.8	152	148.3	168.7	116.3	150.2	16	114.7	175.9	224.3	177.5	179.4
BC2029	219.9	263.7	240.6	233.7	260.5	341.2	393.2	265.6	596	559.8	772.6	667.8
BC2030	1607.6	1857.7	621.5	477	715.1	2726.7	1663.8	618.8	1283.3	802.5	1022.2	678.4
BC2031	29.2	40.4	58.8	17	11	7.2	64.5	39	57.1	19.5	63.2	54
BC2032	255.8	381.7	465	430.1	297.2	482.5	89.3	148.3	208.5	96.4	141.4	144.6
BC2033	36.6	401.9	496.9	359.1	169.7	505.8	221.9	215.9	100	220.9	388.6	94.9
BC2034	17.7	26.6	14.3	17.7	45.5	8	33.2	40	17	32.6	13.2	27.9
BC2035	15	39.9	26.4	59.3	43.7	69.5	19.5	49.3	57.5	77	47.2	55.5
BC2036	1.6	54.1	15	76.1	21.1	19.9	22.2	31.9	37.7	16.2	24.3	57.5
BC2037	6.7	45.1	61.8	42.6	10.2	38.2	28.8	16.4	13	2.9	27.6	31.6
BC2038	351.8	451.9	553.6	549.3	405.3	506.9	678.4	681.5	372.6	394.6	523.5	615.9
BC2039	11.8	5.7	5.3	11.2	10.4	9.5	8.2	26.6	2.2	9.6	6.6	49.4
BC2040	0	14.4	52.8	13.7	0	12.6	6	58.1	33.3	18.8	12.4	80.4
BC2041	137.1	204.5	152.4	224.1	194.2	639.6	693.8	300.9	119	40.6	170.1	70.9
BC2042	14.7	37.9	86.1	62.7	53	13.4	57.4	70.4	192.4	60.9	73.3	87.2
BC2043	37.9	127.2	231.4	278.4	140.5	115.3	160.4	170.7	516.6	561.2	247.2	502.5
BC2044	359.6	237.1	261.1	135.2	398.7	170.1	316.3	233.4	354.8	530.7	315.5	532.7
BC2045	49.2	58.4	78.6	56.5	81.9	340	327.4	225.5	779	782.1	431.7	756.5
BC2046	7084.5	9861.8	10242.2	11506.6	4211.3	13384.1	10102.2	8155.9	5891.1	5690.4	4209.1	4165
BC2047	762.7	756.9	838.6	936.7	721	769.9	872.7	564.5	890.8	987.4	686.1	916.5
BC2048	526	1324.3	1326.1	1168.1	1234.5	2036.2	2069.4	1243.3	3028.2	5370.4	3838.1	4738.7
BC2049	609.2	747.5	997.2	615.1	1013.6	1146.9	1709.2	882.3	1401.9	1896.8	2035.7	2014.1
BC2050	139.2	251.9	355.9	197.9	248.5	438.3	156.6	186.6	232.6	562.3	661.5	459.8
BC2051	1144.1	2016.9	2536.1	1797.7	1647	2427.7	4180.4	2025.8	3957.7	5598.4	5192	5979
BC2052	1126.6	1732.1	1877.4	1512.6	1596.8	1322.4	3833.8	1715.8	3390.4	3666.3	4777.3	4493.6
BC2053	530.4	698.2	811.7	725	634.9	713.6	1979.3	963.5	1777.6	2671.4	2782.9	2362.5
BC2054	62.9	187.5	281.2	250	329.5	460.5	252.8	178.4	230.7	463.7	622.1	572.1
BC2055	11.3	58.1	71.8	82.6	20.5	261.3	25.3	36.6	56.8	46.9	91	169.9
BC2056	1405.4	1817.4	2594.6	2648.8	1352.1	4022.2	2619.6	1635.4	809.8	1831.7	1296.4	1150.7
BC2057	3127.1	3493.6	5390.6	5062.4	4505.8	6706.6	6657.9	3900.8	1992.5	3379.3	3084.5	2540.4
BC2058	51.2	40.2	26.7	33.6	41.2	44.9	26.5	90.8	36.5	13.8	31.6	39.3
BC2059	17.5	124	144.6	45.6	12.1	18.4	21	35	27.6	2.6	3.8	2
BC2060	0	30.4	6.7	39.5	51.8	22.2	79	26.9	40	30.3	23.8	14.1
BC2061	41.7	26.1	142.1	24.8	11.3	48.4	24.1	27.7	54.9	75.1	26.2	18.6
BC2062	72.5	42.4	122.6	14.7	87.7	151.4	12.4	27.6	7.5	141.7	101.1	44.4
BC2063	460.4	514.7	389.4	367.5	579.3	246.5	326.7	160.1	766.8	718.5	988.9	704.7
BC2064	115.8	59.2	44.7	71.7	23.6	63.8	14.5	44.7	62.5	66.3	60.6	38.3
BC2065	26.3	86.1	116.4	47.8	18.9	203.9	52	67.4	30.6	44.5	37	49.3
BC2066	21.7	17.8	16	11.7	38	11.5	56.5	29.7	24.4	8.1	17	15.4
BC2067	184.4	121.2	65	118.9	72.3	12.7	154.1	73.1	318.6	266.4	272.2	188.6
BC2068	44.4	34.9	45.2	64.6	22.9	40.5	17.5	54	42.9	23.4	54.7	63.9
BC2069	820.8	561.9	466.4	734.9	306.8	567.6	157.6	502.6	221.4	303.2	360.4	306.1
BC2070	158.5	97.8	73	65.9	75.6	113.3	79.9	51.7	60	57.1	40.2	33.2
BC2071	430	106.2	84.3	81	97.2	168.4	101.2	87.5	56.3	62.8	72.5	49.3
BC2072	273.9	527	555.2	377.2	215.2	453.9	1423.8	299.1	315.1	460.9	300.5	380.9
BC2073	124.3	164.6	129.4	164.8	93.3	194.2	49.6	56.7	89.2	82	138.7	112.4
BC2074	311	217	149.6	240.2	367.1	108.4	126.8	74.6	84.2	152.7	190.6	61.9
BC2075	1130.6	69	106	50.3	59.4	34.2	0	37.8	40.1	75.9	74.8	40.5
BC2076	185.8	61.6	40.3	42.6	65.5	4.2	0	43.3	16.6	41.4	20	24.8
BC2077	138939	74514.5	94277.7	99383.8	24277.8	124190	145362	88326.6	91862.4	117950	84917	81073
BC2078	4748.8	1076.4	720.5	789	3549.2	955.4	684.6	519.5	1177.7	1502.4	942.5	759
BC2079	896.3	293.8	252.4	216.3	1163.2	323.4	477.1	786.6	383.8	370.4	165	488
BC2080	92.9	47	50.1	60.6	205.5	100.1	22.2	31	66.7	48.9	51.1	22.4
BC2081	318.9	114.7	62.9	44.4	314.7	54.9	57	72.1	143	187.2	119.1	112.3
BC2082	256.4	110.8	33.9	75.1	275.8	53.3	140.3	105.6	104.3	144.4	105.2	57
BC2083	322.6	261	230.2	202.8	757.9	334.2	351	237.1	296.9	334.7	290.6	325.2
BC2084	1339.2	568.8	432.9	489	612.6	595.4	1159.8	755.2	449.2	761.4	464.5	563.9
BC2085	49.3	59.8	50.9	36.2	89.8	13.6	18.9	55.5	71.7	26.4	107.6	48
BC2086	0	28	8	19.5	95	33.4	122.1	28.3	26.8	39.9	34.9	2.4
BC2087	72.2	73.4	34.5	36.9	180.8	28.8	74.5	41.3	76.5	165.4	165.7	134
BC2088	0.4	13.1	9.5	2.4	5	4.6	7.6	18.7	5.5	4.7	47.5	15.8
BC2089	52.4	17.2	11	9.1	27.2	15.9	24.6	47.7	22.9	31.4	21.6	40
BC2090	116.7	3	17.5	10.4	14.4	4.7	7.3	18.9	5.4	6.2	6.4	12.4
BC2091	33.4	18.6	24.9	3.4	48.7	6.9	5.3	24.9	34.1	31.2	14.9	50
BC2092	38.1	12	11.3	7.6	26.8	8.9	18.1	22.9	19.4	22	17.6	22
BC2093	20.1	11.1	9.5	11.1	60.2	54.6	8.3	56.6	24.5	37.7	24.4	31.5
BC2094	182.7	101	112	122.9	94.2	435.4	57	125	281.6	278.4	91.8	173.7
BC2095	0	28.8	45.2	57.6	9	17.7	52	52.7	28.1	42.1	114.5	26.2
BC2096	461.5	695.9	636.4	705.2	543.1	622.2	812.7	498.1	534.4	523.4	650.8	272.8
BC2097	0	155.8	128.8	129.4	146.5	46.4	0	114.3	155.8	34.7	123.2	83.3
BC2098	0	7.5	0	5.1	8.6	9	0	16	6	1.3	3.6	58.3
BC2099	0	29.2	11.3	7.5	0	22	0	19.4	11	5	29.1	14.4
BC2100	123.7	154.9	145.5	110.5	60	377.7	439.8	98.7	328.8	349.5	502.8	511.7
BC2101	2583.2	2170.4	2429.6	2493.3	2413.7	2546.3	3735.3	1768.3	3399.3	3151	3641.2	3877.8
BC2102	353.4	386.2	259.5	562.6	648.3	360.6	198.4	289.7	463.7	359.5	315.2	363.6
BC2103	651.9	737.6	541.3	712.1	896.1	791.5	1097	563.7	1334.3	1608.8	1805.1	1324.5
BC2104	12.8	43.6	37.2	27.9	24	19.3	27	18.1	66.7	73.9	38.4	49.3
BC2105	699.2	780.1	1025.1	1077.9	241	2190.2	2001.1	1264	4200.9	7185.5	8190.6	7488.8
BC2106	157.2	579.5	680.7	927.9	256.8	1393.7	1868	1555.6	1319	1444.4	1993.5	1931.5
BC2107	91.3	112.7	128.7	115.5	323.9	215.5	387.8	298.1	550.3	359.3	460.7	339.5
BC2108	70.9	6.2	27.4	15.2	8.6	4.1	7.5	31.3	16.9	0	23.5	52.4
BC2109	108.5	46.3	42.8	28.5	171.9	44.6	44.2	47.2	35.1	26.7	62.2	42.6
BC2110	70	55.1	51.1	36.2	19	106.4	31.7	70.2	57.1	103.2	83.3	98.3
BC2111	10.3	19.3	12.3	16.2	13.6	21.2	36.5	91.9	21.9	3.9	16	52.5
BC2112	8.5	63.1	107.2	82.8	55.6	62.3	11.6	88.7	162.4	116.2	84.2	77.2
BC2113	1937.6	1793.5	1832.7	1834.2	816.2	3263.5	2736.4	2303.2	6354.5	7729.6	5084.7	5289.2
BC2114	392.3	212.2	280.7	339.7	428.2	333.5	403.6	237.4	642.7	585.4	682.5	521.9
BC2115	33.9	39.8	42.3	50.8	71.1	47.2	129.6	77	49.2	80.8	52.9	66.4
BC2116	59.9	32	17.7	9.7	67.8	31.7	41.2	44.3	91.6	30.2	51.8	71.5
BC2117	26.9	22.5	19	20.2	14.3	9.6	107.2	35.4	81.2	56.1	46.7	40.2
BC2118	43.1	48.6	42.2	27.8	47.5	60.5	62.4	64	30.5	31.2	34.7	57.1
BC2119	3.3	17.9	17	13.5	7.2	41.1	18.2	39.4	12	33.6	15.6	29.5
BC2120	24.7	9.1	6.2	7.9	3.5	28.6	5.2	24	10.1	6.6	12.3	11.6
BC2121	0	13.7	20.7	45.4	170.6	0	50.3	21.4	8.7	35.6	10.7	39.9
BC2122	67.2	58.7	48.9	47.8	79.8	58.9	68.3	67.1	91.9	48.7	102.8	50.3
BC2123	12.6	80.1	69.2	69	47.5	18.9	8.8	63.5	19	11	11.7	15.3
BC2124	36.8	122.3	44.1	75.5	61.5	26.7	64.1	75	42.6	3.4	29.5	44.9
BC2125	67.4	64.9	27.1	23.1	111.2	146	25.3	75.7	14.4	29.1	16	20.1
BC2126	90.1	16.2	12.3	22.7	112.4	26.2	5.9	22.9	11.1	43.4	5.8	13.3
BC2127	47.2	6.8	9	7.6	4.6	22.3	0	201.9	58.4	86.2	8.8	78.9
BC2128	35.1	16	5.5	11.3	5.6	20.1	2.6	23.4	11.8	5.8	12.6	25.1
BC2129	0	19.3	14.3	0	13.7	0	0	35.6	12	0	21.6	8.6
BC2130	49.2	83.8	83.3	70.7	106	232.5	171.5	114.9	304.8	180.6	263.9	337.7
BC2131	220.2	130.2	118.1	88.8	101.1	195.5	537.4	333.2	634.8	599.9	506.5	588.6
BC2132	26.2	29.4	25.8	12.1	21.3	34.9	36.4	43.6	33.7	117.9	20.4	29.5
BC2133	24.8	53.5	57.2	95	79.9	51.7	65.6	84.4	25.4	62.9	67.4	18
BC2134	200.5	54.1	52.6	122.1	68.7	108.6	36.9	55.1	25.4	15.4	11.5	37.8
BC2135	13	229	290.6	702.3	300.3	257.9	54.9	130.3	23.8	13.8	12.8	20
BC2136	413.1	891.1	805.8	1426.3	1152	1123	340.4	507.5	22.1	35.9	33.1	40.7
BC2137	7916.7	6744.2	2534.7	5176.3	16241.7	33319.7	14491.7	18724.4	787	1178.6	427.7	486
BC2138	205.3	71.8	25	25.5	89.3	73.9	36.1	189.7	94.2	303.4	56.5	60.6
BC2139	0	25.7	19.8	7.2	0	15.1	0	4.3	39.7	54.2	21.9	0
BC2140	9.9	39	18.7	45.5	33.8	15.4	6.8	19.1	18.5	63.8	16.4	8.5
BC2141	37.3	47.5	35	55.6	84.5	155.4	231.6	107.3	158	317.8	300.2	385.1
BC2141b	14.5	24.8	0	1.6	118.4	46.5	15.2	29.4	53	87.4	12.3	17.6
BC2142	4512.8	6247.8	9334.1	6508.8	6281.6	10564.9	17442	7635.2	13400.5	19316	20778	16396.7
BC2143	68.3	190.7	110.3	65.4	263.1	183.5	177.2	126.8	173.9	16.2	140.8	73.9
BC2144	341.9	159.5	198.4	109.1	100.1	39.3	9.4	50.9	40.4	211.2	157.3	39.6
BC2145	508.3	190.1	102	97.1	473.2	146.3	222.8	224.4	197.3	331.2	255.1	154.4
BC2146	23.8	12.2	24.8	7.9	23.6	15.4	39.6	26.4	3.3	5.7	8.5	10.1
BC2147	837.7	568.8	596.4	530.4	292.7	1282.7	1205.8	830.2	854.8	1637.6	1266.1	1330.6
BC2148	4713.8	3903.5	4782.3	3814.8	2190.8	10973.9	8590.6	8164.9	7304.2	14823.4	10978.9	12587.5
BC2149	0.8	3.4	19.8	2	4.7	8.8	0	12.1	3	2.7	6.6	20.2
BC2150	67.1	92.2	53.3	86.7	275.8	20	207.9	31.1	29	5.9	31	60.3
BC2151	176	100.3	114.1	131.1	185.1	126.6	116.9	121.6	99.9	96.7	91.9	93.5
BC2152	3168.7	3336.1	3826.2	4206.5	2040.6	3636.6	3814.7	3874.7	2566.2	3599.2	2763.6	3346.4
BC2153	1920.5	3844.9	5061.5	6697.3	2490.8	10269.2	9557.7	5463	3409.8	6938.3	3839.9	3206.7
BC2154	35.9	49.7	135.7	57.6	41.1	10.6	36.3	99.4	100.9	41.6	17.1	56.7
BC2155	426.2	733.6	677.1	901.9	690	839.2	718.7	680	552.7	571.2	429.1	676.5
BC2156	149.2	315.9	351.8	353.3	413.2	396.6	545.3	266.7	153	424.4	281.6	375.5
BC2157	519.7	1195.3	1119.6	1244.5	356.6	1353.7	1237	842.1	1317.9	835.3	1508	1349
BC2158	44.9	62	82.6	75.9	24.2	2.3	17.7	23.7	61.3	19.2	62.5	85.4
BC2159	320.9	187.5	191	179.6	236.7	501.9	215.1	198.3	198.6	214.8	170.3	152.6
BC2160	0	7.5	50.1	111.2	26.3	11.3	36.9	91.8	20.5	28.2	33.1	44.7
[truncated: 3,412 more rows]

## Sheet: S3_Sign hits T5
The dataset from Table S2 was filtered to contain data only from genes expressed at T5 that showed little variation between biological replicates of the same strain.
Excel conditional formatting was used to visualize differences in gene expression values between two replicates (similar colour) and between two strains (two diferent colours).
Down-regulation in gene expression in the spoVT-mutant strain is visualized in red, whereas up-regulation is visualized in green.
The data for two biological replicates of the same strain are shown separately.
The ratio in gene expression was calculated by taking the difference of the 2log-transformed values at T5 between the wt and the spoVT mutant strain.
The fold change in gene expression was calculated by raising the number 2 to the power of the absolute ratio value.
Orthologs of known sporulation genes in B. subtilis are indicated in bold face. Regulation during sporulation in B. subtilis was derived from information on SporeWeb (http://sporeweb.molgenrug.nl).
Downregulated genes in the spoVT background - enhanced expression by SpoVT
Locus tag	RPKM values				Biological ratio	Fold-change	Gene function	Sporulation regulation
	T=5 wt1	T=5 wt2	T=5 VT1	T=5 VT2
BC1117	40473.7	45489.9	18.6	10.2	11.5434	2984.85	hypothetical protein, homology to B. cereus group-specific hypothetical protein
BC0059	396.2	933.1	18	8.9	5.62692	49.4164	spoVT	SigF, SigG, SpoVT (-)
BC1116	194.4	391.1	1.6	12.9	5.33554	40.3793	glyoxalase/bleomycin resistance protein/dioxygenase superfamily protein	In operon with BC1115
BC0987	274.3	687.4	10.7	15.3	5.209	36.9885	hypothetical protein, homology to hypothetical protein
BC1457	288.9	570.2	21.1	22.3	4.30706	19.7949	hypothetical protein, homology to hypothetical protein
BC2492	188.7	333.4	17.9	11.8	4.13579	17.5791	hypothetical protein, homology to B. cereus group-specific hypothetical protein
BC2270	327	164.3	4.6	28.6	3.88735	14.7982	hypothetical protein, homology to B. cereus group-specific hypothetical protein
BC3002	103.3	160.8	11.9	15.7	3.25834	9.56884	hypothetical protein, homology to B. cereus group-specific hypothetical protein
BC0973	24	37.4	2.6	4.4	3.13281	8.77143	hypothetical protein, B. cereus group membrane protein	SigA
BC2874	279	291.6	37.3	30.1	3.08166	8.46588	spore coat protein X	GerE, SigK
BC2426	538.5	797	65.3	106.8	2.95606	7.76002	hypothetical protein, homology to B. cereus group-specific hypothetical protein	SigA
BC2872	865.5	1793.8	181.8	167.3	2.92933	7.61759	spore coat protein X	GerE, SigK
BC3290	79	64	13.8	7.8	2.72691	6.62037	cytoplasmic protein
BC1115	573	446	114.4	64.2	2.51235	5.70549	AraC family transcriptional regulator	SigE
BC5349	1458	848.5	178.3	256.4	2.40761	5.30596	PapR protein
BC1678	242.5	147.4	29	56.1	2.19587	4.58167	JEMB
BC0669	35.9	31.9	6	10.2	2.06529	4.18519	potassium channel protein
BC5323	221.5	345.9	85.1	62.6	1.9417	3.84157	hypothetical protein
BC4482	30.2	45.9	2.7	17.6	1.90642	3.74877	hypothetical protein
BC4731	20.9	31.9	7.3	7.3	1.85457	3.61644	spore germination protein IA	SigG, SpoVT
BC0985	28	48.2	13.8	7.5	1.83894	3.57746	hypothetical protein
BC3300	72.7	66.9	16.7	23	1.81409	3.51637	hypothetical protein
BC0391	105.5	74.5	24.6	27.1	1.79976	3.48162	hypothetical protein, sporulation protein ywrJ ortholog	SigK
BC3677	84.5	91.6	11.6	40.3	1.76259	3.39306	N-acetylmuramoyl-L-alanine amidase
BC4219	19.8	23.2	3.3	9.6	1.73697	3.33333	ABC transporter permease
BC2858	977.2	1080.7	355.5	271.5	1.71464	3.28214	hypothetical protein
BC3276	153.2	141.5	52.7	42.7	1.62719	3.0891	hypothetical protein
BC2493	462	592.1	180.7	164.4	1.61093	3.05448	hypothetical protein
BC5180	47.9	43	15.4	14.8	1.58973	3.00993	transposase
BC1988	179.7	205.8	67	66.3	1.53205	2.89197	hypothetical protein
BC2342	180.5	145.6	52.7	60.9	1.52135	2.8706	transposase
BC5199	254.5	176.8	82.7	70.6	1.49233	2.81344	Xaa-Pro dipeptidase, sporulation protein yvyE ortholog	Spo0A (-)
BC0500	579.9	753.5	265.3	208.7	1.49215	2.81308	hypothetical protein
BC1836	85.5	59	22.2	29.4	1.48563	2.80039	branched chain amino acid ABC transporter carrier protein
BC0546	248.1	163.9	93.2	57.3	1.45288	2.73754	RNA methyltransferase, sporulation protein cspR ortholog	SigE
BC3108	30.7	43.7	13.5	14	1.43587	2.70545	amino acid permease; basic amino acid/polyamine antiporter, APA family
BC0226	25.9	27	6.7	13.2	1.4105	2.65829	hypothetical protein
BC2527	591.3	678.4	239.2	242.4	1.39858	2.63642	CAAX amino protease; uncharacterized protein
BC3685	41.5	53.4	15	21.1	1.39441	2.62881	phosphonate ABC transporter ATP-binding protein
BC3657	124.7	179.5	56.3	60.2	1.38469	2.61116	4-methyl-5(B-hydroxyethyl)-thiazole monophosphate biosynthesis enzyme
BC0292	605.6	756.9	245.4	277.7	1.3811	2.60466	hypothetical protein
BC1603	1928.4	2280.4	953.3	694.8	1.35261	2.55373	cold shock protein; beta-ribbon, CspA family
BC4548	739.3	869.7	368.6	312.8	1.23959	2.36131	cell surface protein
BC0688	315.9	335.2	124	158	1.20718	2.30887	permease; K03293 amino acid transporter, AAT family
BC0551	248.8	244.2	127.9	89.4	1.1819	2.26875	hypothetical protein, sporulation protein yhbH ortholog	SigE, SpoIIID (-)
BC1279	28191.5	23386.2	10184.7	12751.7	1.16911	2.24873	spore coat-associated protein N
BC1913	669.5	495.8	288.5	239.5	1.14209	2.20701	Phage protein
BC0615	106.6	140	57.4	55.4	1.12841	2.18617	di-/tripeptide transporter; sporulation protein yclF ortholog	ScoC, SigE
BC2444	27.2	36.4	12.6	16.8	1.11321	2.16327	transcription state transcriptional regulator AbrB
BC2231	724.7	967.2	390.3	392.8	1.11138	2.16052	cytoplasmic protein
BC2643	23.6	32.2	12.6	13.7	1.0852	2.12167	HAD superfamily hydrolase
BC3043	37.8	40.7	16.3	21.5	1.05431	2.07672	two-component response regulator ybdJ
BC4280	300.5	297.1	173.3	134.2	0.958594	1.94341	hypothetical protein, sporulation protein yqfU ortholog	SigG
BC0298	120.9	182.5	91.7	64.5	0.957827	1.94238	two-component response regulator
BC5275	46.7	66.4	32.6	26.1	0.946167	1.92675	UTP-glucose-1-phosphate uridylyltransferase
BC4100	432.2	366.3	143.6	272.8	0.939322	1.91763	5'-nucleotidase, sporulation protein yhcR ortholog	SigH
BC5268	124.1	76.7	51.9	53	0.936745	1.9142	secreted polysaccharide polymerase
BC3732	1134.9	1031.5	520.6	638.3	0.902544	1.86936	cytoplasmic protein
BC4578	296.7	287.9	150.1	170.1	0.868477	1.82573	hypothetical protein
BC3577	73.5	70.7	43.9	35.7	0.857231	1.81156	amino acid permease
BC4148	4594.4	3274.8	2240.3	2150.1	0.841865	1.79237	arginine ABC transporter ATP-binding protein
BC5437	606.4	662.8	287.5	423.4	0.836201	1.78534	hypothetical protein, sporulation protein ydbI ortholog	SigE, SpoIIID (-)
BC2279	83.8	103.1	51.1	54	0.830504	1.77831	hypothetical protein
BC3960	11401.3	9380.4	5526.7	6258.9	0.818288	1.76331	hypothetical protein
BC1586	2214.2	1977	1313.3	1071.6	0.813435	1.75739	undecaprenyl-phosphate galactosephosphotransferase
BC0041	85.7	90.5	46.7	53.7	0.811455	1.75498	Corrin/porphyrin methyltransferase
BC4705	107.3	97	48.4	68.2	0.809121	1.75214	export protein for polysaccharides and teichoic acids
BC2371	66.8	57.2	39.5	31.7	0.800391	1.74157	multidrug ABC transporter permease/ATP-binding protein
BC0601	1804.1	1675.9	1079.4	925.3	0.795701	1.73592	transcriptional activator NprR
BC3217	33.6	41.9	19.3	24.6	0.782256	1.71982	Icc family phosphohydrolase
BC1584	1477.7	1144.9	734.9	798.9	0.773887	1.70987	capsular polysaccharide protein CpsC
BC3398	31.8	43.9	19.5	24.9	0.769734	1.70495	Serine transporter
BC0866	37.1	30.7	18.4	21.7	0.757683	1.69077	glutamate racemase
BC5400	99.7	66.9	49.7	49.6	0.746523	1.67774	bacitracin transport ATP-binding protein bcrA
BC0012	38	38.7	17.6	29.1	0.715804	1.6424	hypothetical protein, sporulation protein yaaC ortholog
BC2382	2394.3	1994.7	1510.5	1165.2	0.713976	1.64032	hypothetical protein
BC5208	44.9	47.6	26.5	30.6	0.695963	1.61996	hypothetical protein; chitin disaccharide deacetylase
BC0504	34.7	37.7	19.6	25.1	0.695715	1.61969	A/G-specific adenine glycosylase (DNA repair), sporulation protein mutY ortholog	SigG
BC1340	1214.1	1038.8	626.6	765	0.695039	1.61893	two-component system, sporulation sensor kinase B
BC4483	898.8	827.8	575.8	503.1	0.678373	1.60033	hypothetical protein, sporulation protein yvbH ortholog	SigE
BC0914	32.9	40.9	23.8	22.4	0.675728	1.5974	hypothetical protein
BC3635	18354	21297	11031.2	13838.9	0.672945	1.59432	hypothetical protein
BC4081	2446.8	2970.5	1716.3	1688.2	0.670131	1.59122	MarR family transcriptional regulator
BC4370	738.8	797	491	487.3	0.650642	1.56987	hypothetical protein, sporulation protein yrzA ortholog	SigK
BC0114	9883.7	10822.7	6902.7	6356.6	0.643072	1.56165	RNA polymerase factor sigma-70	AbrB, SigH
secY	887.9	822.6	571.4	525.5	0.640986	1.55939	protein translocase subunit
BC4785	2995.4	2756.8	1887.3	1998.7	0.565828	1.48024	phosphohydrolase (MutTA)	SigF
BC0539	1972.4	2338.6	1527.9	1384.6	0.565765	1.48017	hypothetical protein
BC0200	1357.1	1489.6	997.5	985.1	0.521897	1.43584	hypothetical protein
BC4666	63.4	65.1	40.9	49	0.515375	1.42937	two component system histidine kinase
BC5048	2140.6	1835.4	1328.2	1458.4	0.512812	1.42683	ferritin; K02217 ferritin
BC0651	71.3	69.4	48.8	52.3	0.476839	1.39169	two component system histidine kinase
BC2046	5891.1	5690.4	4209.1	4165	0.467816	1.38301	CBS domain-containing protein
Upregulated genes in the spoVT background - repressed by SpoVT
	T=5 wt1	T=5 wt2	T=5 VT1	T=5 VT2
BC1392	6.3	5.9	100.6	54.1	-3.66452	12.6803	hypothetical protein
BC2722	11.5	12.5	69.9	97.4	-2.80133	6.97083	dATP pyrophosphohydrolase
BC5385	81.5	129.7	773.2	437.2	-2.5188	5.73106	prespore specific transcriptional activator rsfA	SigG, RsfA (-), SigF
BC5390	34.1	49.4	168.1	280.9	-2.42687	5.37725	cell wall hydrolase cwlJ1	SigE, SpoIIID (+)
BC3935	29.4	14.7	99.4	130.2	-2.38027	5.20635	hypothetical protein, sporulation protein ylbE ortholog	SigK
BC3763	13.1	12	39.4	81.4	-2.26686	4.81275	BC3763
BC0830	27.1	14.3	118	76.1	-2.2291	4.68841	hypothetical protein
BC5283	177.7	222.6	1094.1	707	-2.16972	4.49938	stage II sporulation protein Q, spoIIQ	SigF
BC3174	54.4	43.9	234.1	202.8	-2.15204	4.44456	short chain dehydrogenase, fabG
BC1849	19.8	16.2	68.6	90.9	-2.14749	4.43056	Phage protein
BC4336	18.6	21.3	62.9	109.4	-2.11046	4.3183	sporulation sigma factor SigK; RNA polymerase sporulation-specific sigma factor	GerR (-), GerE (-), SigE, SpoIIID (+), SigK
hisE	231.9	140.7	823.9	741	-2.07037	4.19995	phosphoribosyl-ATP pyrophosphohydrolase, histidine biosynthesis
BC1470	15	9.1	56.2	44.3	-2.06009	4.17012	spore maturation protein A, spmA	SigE
BC1356	13	11.9	45.8	55.9	-2.0301	4.08434	GntR family transcriptional regulator
BC1560	236.3	226.6	1083.4	777.2	-2.007	4.01944	spore coat protein D, cotD	GerE (+), SpoIIID (-), SigK
BC3607	5.1	7	20.9	25.5	-1.93912	3.83471	spore peptidoglycan hydrolase, yaaH	SigE, SpoIIID (-)
BC3777	53.5	39.4	227.3	125.6	-1.92551	3.79871	phosphodiesterase; sporulation protein ymdB ortholog (control of bistable gene expression)	SigK
BC3190	18.4	12.4	58.9	57	-1.91188	3.76299	LysR family transcriptional regulator
BC2187	27.4	38.5	119.7	116.8	-1.84349	3.58877	phosphoglycolate phosphatase
BC5050	8	8.3	23.5	33.5	-1.80609	3.49693	nucleoside permease nupC	SigK
tgl	17.1	35.8	108	76.5	-1.80228	3.48771	protein-glutamine gamma-glutamyltransferase
BC5480	18.4	25.3	68.7	83.1	-1.79647	3.47368	hypothetical protein, sporulation protein yyaC ortholog	SigF
BC3759	11.5	13.4	42.5	43.8	-1.79321	3.46586	6-phospho-beta-glucosidase
BC4318	62.7	64	134.2	298.8	-1.77295	3.41752	hypothetical protein, sporulation protein yqxA ortholog	SigE
BC1509	102.6	103.4	446.7	233.7	-1.72374	3.30291	spoIVA	SigE, SpoIIID (-)
BC0363	11.1	12	40.2	35.4	-1.71049	3.27273	nucleoside permease nupC
BC4186	84.6	47.9	185.8	247.5	-1.70937	3.27019	spoIIIAH	SpoIIID (-), SigE
BC1723	21.9	18.7	68.7	62.1	-1.68781	3.22167	prolipoprotein diacylglyceryl transferase
BC4246	30.8	62.9	146.2	137.5	-1.59825	3.02775	hypothetical protein
BC3028	11	17.8	38.4	48.4	-1.59163	3.01389	phosphohydrolase (MutT/nudix family protein)
BC4501	278.8	386.9	1119.5	853.6	-1.56752	2.96395	germination protein gerE, transcriptional regulator of spore coat protein	SigK, SpoIIID (+)
BC0888	55	43.3	128.3	151.8	-1.51068	2.84944	N-acetylmuramoyl-L-alanine amidase
prmA	304.4	189.2	662.1	731.1	-1.49699	2.82253	ribosomal protein, ribosome biogenesis
BC3712	132.7	73.1	298.4	271	-1.4682	2.76676	hypothetical protein
BC2586	12.4	8.6	28	29.2	-1.44563	2.72381	Phage prohead protease
BC1174	1552.6	1471.4	4881.5	3327.8	-1.4408	2.71472	3-oxoacyl-ACP synthase
BC0757	13.4	8.5	26.1	31.1	-1.38508	2.61187	bicyclomycin resistance protein
prsA	61.2	59.1	151.8	161	-1.3786	2.60017	ribose-phosphate pyrophosphokinase
BC3750	12.5	11.3	28.4	31.5	-1.33159	2.51681	UDP-N-acetylglucosamine 4,6-dehydratase
BC2055	56.8	46.9	91	169.9	-1.33108	2.51591	macrolide-efflux protein, sporulation protein yfmI ortholog	AbrB, Spo0A
BC2900	17.3	16.5	42.2	42.7	-1.32874	2.51183	CcdC protein
BC3795	26.5	19.9	70.6	45.6	-1.32441	2.50431	protease tepA (degradation of SASPs)	SigG
BC0713	49.9	29	85.1	109.5	-1.30241	2.46641	ATP-binding protein (P-loop)
hisH	670.8	540.9	1645.1	1342.7	-1.30205	2.46579	histidine biosynthesis
BC2980	67.7	71.1	121.4	219.1	-1.29465	2.45317	arginine permease, rocC
BC1854	13.9	7.2	26.5	25	-1.28733	2.44076	cytoplasmic protein
BC3123	117.9	142	318.4	313	-1.2806	2.4294	hydrolase
BC3131	139.9	148.1	393.2	298.7	-1.26449	2.40243	hypothetical protein
rpsN	726.6	403.6	1498.1	1212.6	-1.26209	2.39843	small ribosomal subunit protein
rplE	638.7	868	1837.3	1704	-1.23289	2.35037	large subunit ribosomal protein
BC3173	35.7	30	76.1	77.8	-1.22803	2.34247	hypothetical protein
BC3903	34.6	37.4	56.9	111.3	-1.22411	2.33611	sporulation sigma factor SigG	AbrB, SigF, SigG, Spo0A (+), SpoVT (-), SinR (-)
BC1915	546.1	772.2	1525.5	1540.8	-1.21782	2.32595	PbsX family transcriptional regulator
rpsQ	1201	1682.5	3005	3669.5	-1.21084	2.31472	small ribosomal subunit protein
BC3358	33.1	51.8	83.3	113.1	-1.20996	2.31331	glucose-1-phosphate cytidylyltransferase, yfnH
rpsJ	506.2	578.6	1280	1215.6	-1.20196	2.30052	small ribosomal subunit protein
BC4850	190.7	221.7	411	509.2	-1.1579	2.23133	BC4850
BC3892	318.4	224.1	550.4	641.9	-1.13605	2.19779	ribosomal large subunit pseudouridine synthase D
rplC	3786.6	2469.8	5958.9	7766.7	-1.13346	2.19385	large subunit ribosomal protein
BC1309	67.8	93.9	144.7	209.3	-1.13043	2.18924	TerC-like protein, sporulation protein ykoY ortholog	SigK
dnaK	3222.9	3607.9	7939	6980.1	-1.12703	2.18409	molecular chaperone
BC3181	231.2	292	514.2	624.5	-1.12195	2.17641	hypothetical protein
BC1884	63.8	67	172.2	112.2	-1.12056	2.17431	transcription state transcriptional regulator AbrB
BC1127	1494	1467.3	3012.4	3406.8	-1.11616	2.1677	malate synthase
BC4313	1419.8	1752.2	4021	2733.3	-1.09041	2.12935	heat shock protein GrpE
BC4325	29.8	36.6	55.5	85.8	-1.08951	2.12801	late competence protein ComER	SigE
BC0034	22.6	20.4	48.6	42.9	-1.08944	2.12791	CsfB protein	SigF
BC4920	56.6	41.9	72.5	137	-1.08875	2.1269	hypothetical protein, sporulation protein cdaS ortholog	SigG
rpmD	3507.3	2992.4	6413.2	7383.1	-1.08584	2.12261	large subunit ribosomal protein
rpsC	1096.3	864.4	2087.9	1966.1	-1.04798	2.06763	small ribosomal subunit protein
BC0667	62.2	58.5	151.6	97.8	-1.04704	2.06628	bicyclomycin resistance protein
BC1579	36.2	42.3	85.6	75.8	-1.03988	2.05605	synthetase/amidase
rplD	2430.5	1914.8	4976.8	3871.4	-1.02593	2.03627	large subunit ribosomal protein
BC0127	2060.8	1936.3	3930.6	4203.9	-1.0251	2.0351	BC0127
rplO	1441.2	1630.8	3321.2	2913.9	-1.02123	2.02965	large subunit ribosomal protein
rplR	4269.2	4352.8	7796.1	9615.5	-1.01395	2.01944	large subunit ribosomal protein
BC3676	16.9	19.1	33.8	38.7	-1.00998	2.01389	hypothetical protein
fabG	556.6	862.5	1418.3	1434.9	-1.0076	2.01057	3-oxoacyl-[acyl-carrier protein] reductase, Fatty acid biosynthesis
rplQ	6728.3	8037.7	16828.6	12749.9	-1.00227	2.00315	large subunit ribosomal protein
BC5441	27.6	17.5	39.2	51	-1	2	autolysin sensor kinase
BC1410	1276	1057.4	2545.9	2095.5	-0.992126	1.98911	imidazole glycerol phosphate synthase subunit HisF
BC3153	26.5	23.9	58.6	41.6	-0.991387	1.9881	arsenical-resistance protein arsB	SigF
BC2906	137.1	120.2	285.4	225.5	-0.989589	1.98562	hypothetical protein
BC1221	379.9	259.5	594	670.5	-0.983776	1.97764	hypothetical protein
BC4158	332.6	166.5	443.8	542.6	-0.982844	1.97636	2-oxoisovalerate dehydrogenase subunit beta
BC4191	68.7	83.7	128.2	171.3	-0.974693	1.96522	stage III sporulation protein AC, spoIIIAC	SpoIIID (-), SigE
BC0400	340.8	467.9	858.1	727.5	-0.971352	1.96068	Fatty acid desaturase
BC4762	1185.5	1573.6	2450.2	2922.9	-0.961557	1.94741	phosphoenolpyruvate carboxykinase
BC5466	1633.6	1452.2	2964.7	2965.7	-0.942485	1.92184	tRNA-Glu
BC1128	2269.4	2066.7	3954.6	4373.6	-0.941607	1.92067	isocitrate lyase
BC5270	28.9	25	40.3	62.7	-0.934287	1.91095	epsL	AbrB, SigH, SinR (-)
BC0158	3048.5	2866.8	5506.2	5771	-0.930886	1.90645	DNA-directed RNA polymerase subunit alpha
BC1138	156.7	180.3	284.5	356.7	-0.928026	1.90267	ATP-dependent nuclease subunit A
BC2952	40.3	47.5	66.4	100	-0.922363	1.89522	enterotoxin / cell-wall binding protein
BC3130	250.3	299	547.7	486.4	-0.91271	1.88258	hypothetical protein
BC4981	1105.6	1200	2200.1	2104.4	-0.900703	1.86698	cysteine desulfhydrase
rpsE	3518.5	3409.7	6222.3	6641.7	-0.892787	1.85676	small ribosomal subunit protein
BC0342	217.7	166.3	361.6	350.3	-0.890568	1.85391	sex pheromone staph-cAM373 precursor
BC1170	20.1	16.1	35.7	31.2	-0.886017	1.84807	hydrolase, sporulation protein yjaU ortholog	GerE (+), SigK
BC1413	872.8	1014.8	1841.1	1640.8	-0.883322	1.84462	histidinol-phosphatase (PHP family)
BC3908	102.4	124.1	239.9	177	-0.88019	1.84062	cell division protein ftsQ	SigE, SpoIIID (-)
BC0581	293	339.4	498.1	665.6	-0.87981	1.84013	hypothetical protein
BC3970	317.2	305.3	528.5	611.9	-0.873394	1.83197	dihydrolipoamide dehydrogenase
BC3424	12.7	14.1	23.1	25.8	-0.867601	1.82463	BC3424
BC0157	2570	2368	4057.3	4952.2	-0.86752	1.82452	30S ribosomal protein S11;small subunit
BC1610	12640.4	14386.4	22233.1	26699.9	-0.856417	1.81054	aminotransferase
BC0031	49818.9	33832.7	76118	73122.8	-0.835177	1.78408	tRNA-Ala; K14218 tRNA Ala
BC0258	141.7	123.9	225.7	244.3	-0.823406	1.76958	UDP-N-acetylmuramoylalanyl-D-glutamyl-2,6-diaminopimelate--D-alanyl-D-alanyl ligase
BC0123	5439.1	5354.4	8674.9	10363.8	-0.818772	1.7639	DNA-directed RNA polymerase subunit beta
BC5003	4662.9	4120.1	7604	7832.8	-0.813588	1.75758	acetyl-CoA acetyltransferase
BC1997	2672.1	3363.4	5043.4	5529.4	-0.808812	1.75177	intracellular serine protease
BC1030	27	29.5	41.6	57.3	-0.80772	1.75044	hypothetical protein
BC0063	194.7	235.2	365.2	382.3	-0.798072	1.73878	hypothetical protein, sporulation protein yabP otholog	SigE, SpoIIID (-)
BC3781	211.9	173.5	326	342.3	-0.794139	1.73404	CDP-diacylglycerol--glycerol-3-phosphate 3-phosphatidyltransferase
BC4157	564.9	700.8	1054.7	1127.8	-0.786046	1.72434	branched-chain alpha-keto acid dehydrogenase subunit E2
BC5306	4276.3	3946.3	6437.5	7679.5	-0.779767	1.71685	ATP synthase F0F1 subunit beta
BC1628	14.3	17.5	27.5	27	-0.777229	1.71384	two-component sensor kinase CheA (chemotaxis)	Spo0A (-)
BC0061	495.6	365.5	780.7	694.9	-0.777049	1.71362	MazG protein; K02499 tetrapyrrole methylase family protein
BC5286	22.4	28.7	41.3	46	-0.772658	1.70841	transcriptional regulator; K01990 ABC-2 type transport system ATP-binding protein
BC4072	43465.9	81262.7	105856	106707	-0.769098	1.7042	sporulation sigma factor SigF	AbrB, SigF, SigG, SigH, SinR (-), Spo0A (+)
BC4073	25272.2	41919.5	59526.8	54956.4	-0.768781	1.70383	stage II sporulation protein AB (anti-sigma F factor); spoIIAB	AbrB, SigF, SigG, SigH, SinR (-), Spo0A (+)
BC5307	3272.4	3235.7	5062.5	6013	-0.767064	1.7018	ATP synthase F0F1 subunit gamma
BC4074	15293.9	26596.9	36719.6	34360.3	-0.762808	1.69679	stage II sporulation protein AA (anti-sigma F factor antagonist); spoIIAA	AbrB, SigF, SigG, SigH, SinR (-), Spo0A (+)
BC5004	2762.1	3098.1	4449.6	5366.7	-0.744229	1.67508	enoyl-CoA hydratase
BC4463	1166.5	1499.1	2427	2000	-0.731869	1.66079	stage II sporulation protein B; spoIIB	Spo0A (+)
BC4478	78.6	105.7	155.1	150.7	-0.730532	1.65925	ATP-dependent protease LonB	SigF
BC2252	8556.7	8946.7	13860.6	15111.6	-0.727034	1.65523	cytoplasmic protein, sporulation protein yokU ortholog	SigE
rpsM	5622.7	5266.2	9793.5	8197.8	-0.724441	1.65226	small ribosomal subunit protein
rpsL	6642.2	6315.5	11118.4	10263.2	-0.72256	1.65011	small ribosomal subunit protein
BC5405	17093	17517.5	24991.5	32064	-0.721156	1.6485	homoserine O-succinyltransferase
BC5435	336.1	267.4	489.5	504	-0.719166	1.64623	acriflavin resistance plasma membrane protein
BC2517	43.9	58.7	70.4	98.2	-0.716574	1.64327	MarR family transcriptional regulator
BC5404	21950.7	22338.5	33128.7	39398.8	-0.711573	1.63759	homoserine dehydrogenase
BC4987	2166	1775.3	3548.1	2887.2	-0.707336	1.63279	ABC transporter ATP-binding protein
BC2251	9517.9	9102.2	14233.6	16111.4	-0.704598	1.62969	lysine 2,3-aminomutase, sporulation protein kamA ortholog	SigE
BC4979	2895.6	3613	5365.9	5134.4	-0.690011	1.6133	ABC transporter-associated protein SufB
BC4270	612.7	517.4	995.1	823.8	-0.686616	1.6095	penicillin-binding protein
BC4884	9650.9	8408.1	11966.7	17082.5	-0.68578	1.60857	tRNA-Ala; K14218 tRNA Ala
fusA	5974.6	4650.6	8004.1	8966.4	-0.675539	1.59719	elongation factor G
BC4893	5.72105e+06	4.87263e+06	7.92271e+06	8997077	-0.675506	1.59716	23S ribosomal RNA; K01980 23S ribosomal RNA
BC0863	76	96.6	142.6	133	-0.675143	1.59676	catalase
BC2833	21667.8	20415.4	32022.3	34710.6	-0.665154	1.58574	dihydrodipicolinate synthase
BC4901	1738.1	1413.6	2489.6	2489.4	-0.659726	1.57978	hypothetical protein
BC4963	377.9	483.5	651.8	703.2	-0.653538	1.57302	cytoplasmic protein
rplP	1158.3	1777	2457.6	2157.7	-0.652916	1.57234	large subunit ribosomal protein
BC3178	817.8	776.2	1270.9	1218.4	-0.643088	1.56167	lactoylglutathione lyase
BC5308	4843.5	3727.1	6802.8	6539.3	-0.638518	1.55673	ATP synthase F0F1 subunit alpha
BC0103	890.7	680.4	1189.3	1254.1	-0.637115	1.55522	DNA repair protein RadA
BC5288	5281.7	5283.7	8827	7441.7	-0.622752	1.53981	UDP-N-acetylglucosamine 1-carboxyvinyltransferase
BC3906	10648.1	13704.6	18052.1	19286.1	-0.616571	1.53323	cell division protein FtsZ	SigH
BC4218	18.8	19.9	28.1	31.1	-0.613264	1.52972	ABC transporter permease
BC3688	372.8	442.7	603.4	633.4	-0.600855	1.51662	hypothetical protein
BC0717	23185.5	28974	38616.6	40272.9	-0.596903	1.51247	tRNA-Val; K14237 tRNA Val
BC2100	328.8	349.5	502.8	511.7	-0.580773	1.49565	methyltransferase
BC3916	1387.8	1615.2	2315.6	2164.5	-0.577126	1.49187	division specific D,D-transpeptidase / cell division protein ftsI
BC3679	74.8	62	102.1	101.4	-0.572961	1.48757	multidrug ABC transporter permease	SpoIIID (+)
BC2038	372.6	394.6	523.5	615.9	-0.5706	1.48514	acyl-CoA hydrolase
BC5129	1312	1169	1782.9	1850.8	-0.550518	1.46461	exoribonuclease II
BC5002	3727	4348.1	6017.4	5782.5	-0.547223	1.46127	acyl-CoA dehydrogenase
rplK	6693.8	5381.4	8716.4	8670.5	-0.525954	1.43989	large subunit ribosomal protein
BC4874	27438	29528.6	38803.1	42715.8	-0.517018	1.43099	tRNA-Ile; K14227 tRNA Ile
BC3907	4610.4	5468.7	7218.2	7143.5	-0.51086	1.4249	cell division protein ftsA	SigH
BC3033	59.1	59.2	86.2	81.9	-0.50687	1.42096	AraC family transcriptional regulator
BC2106	1319	1444.4	1993.5	1931.5	-0.506248	1.42035	hypothetical protein
BC2896	1178.5	1034.3	1507.3	1413.6	-0.40054	1.32	aspartate aminotransferase
rplU	5840.1	5690.2	7709.9	7292.2	-0.379734	1.3011	large subunit ribosomal protein
BC5358	44.3	46.8	57.1	59.7	-0.358517	1.28211	collagen adhesion protein
gltX	1444.3	1341.5	1780	1747.8	-0.340677	1.26635	glutamyl-tRNA synthetase
